# Supplementary material for: Proteogenomic Analysis of Protein Sequence Alterations in Breast Cancer Cells
Source: PubMed Central journal article supplement (PMC6637242; doi:10.1038/s41598-019-46897-z), 2019-07-17

# Proteogenomic Analysis of Protein Sequence Alterations in Breast Cancer Cells

## Supplemental Dataset S1

<sup>1,2</sup>Iulia M. Lazar,\* <sup>1</sup>Arba Karcini, <sup>1</sup>Shreya Ahuja, and <sup>3</sup>Carli Estrada-Palma

<sup>1</sup>Department of Biological Sciences, <sup>2</sup>Carilion School of Medicine, and <sup>3</sup>Department of Biochemistry, Virginia Tech  
1981 Kraft Drive, Blacksburg, VA 24061

\*Correspondence to: Iulia M. Lazar

E-mail: [malazar@vt.edu](mailto:malazar@vt.edu)

Phone: 540-231-5077

Sequence: AFQHLSEAVQAAEEEAQPPSWSCGLAAGVIDAYMTLADFCDDQLR, Charge: +3, Monoisotopic m/z: 1624.28000 Da (+1194.34 mmu/+735.31 ppm), MH+: 4870.82545 Da, RT: 204.08 min

Identified with: Sequest HT (v1.3); XCorr:5.64

Fragment match tolerance used for search: 1 Da

Fragments used for search: a; a-H<sub>2</sub>O; a-NH<sub>3</sub>; b; b-H<sub>2</sub>O; b-NH<sub>3</sub>; y; y-H<sub>2</sub>O; y-NH<sub>3</sub>

**Protein references (1):** c.10214C>T p.P3405L|SCGLAAG|Missense|COSMIC|Autonomic ganglia(1)

CANCER\_sp\_P78527,PRKDC\_HUMAN DNA-dependent protein kinase catalytic subunit

Extracted from: C:\Users\lazar\Desktop\MCF10\_raw\MCF10\_Raw\_2011\MCF10\_SN2\_C18SCX\_100511\_1.RAW #24141 RT: 204.08  
ITMS, CID@35.00, z=+3, Mono m/z=1624.28000 Da, MH+=4870.82545 Da, Match Tol.=1 Da

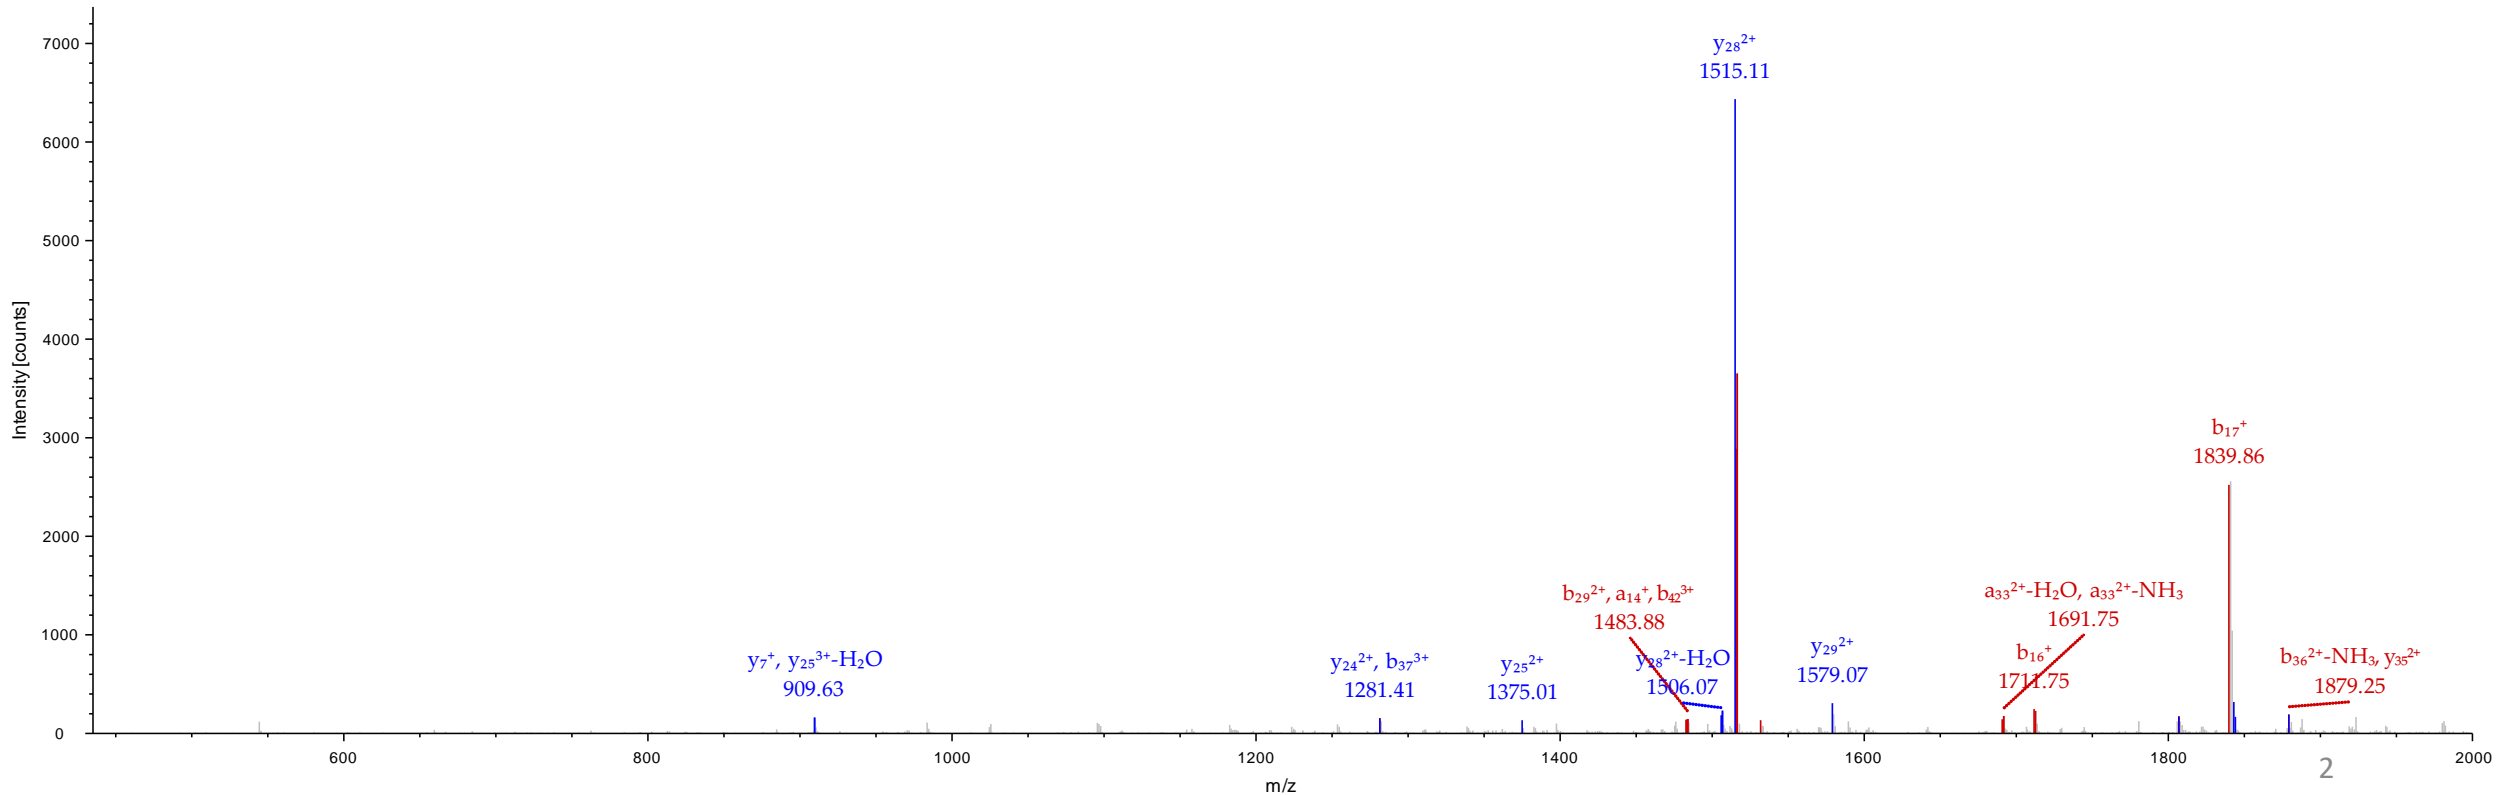

Sequence: AGNVSKDEIDSAVKMLVSLK, Charge: +3, Monoisotopic m/z: 702.26000 Da (+211.37 mmu/+300.98 ppm), MH+: 2104.76545 Da, RT: 170.12 min

Identified with: Sequest HT (v1.3); XCorr:4.20

Fragment match tolerance used for search: 1 Da

Fragments used for search: a; a-H<sub>2</sub>O; a-NH<sub>3</sub>; b; b-H<sub>2</sub>O; b-NH<sub>3</sub>; y; y-H<sub>2</sub>O; y-NH<sub>3</sub>

**Protein references (1):** c.92C>T p.A31V|AGNVSKD|Missense|COSMIC|Large intestine(1) CANCER\_sp\_P23381,SYWC\_HUMAN

Tryptophan--tRNA ligase, cytoplasmic

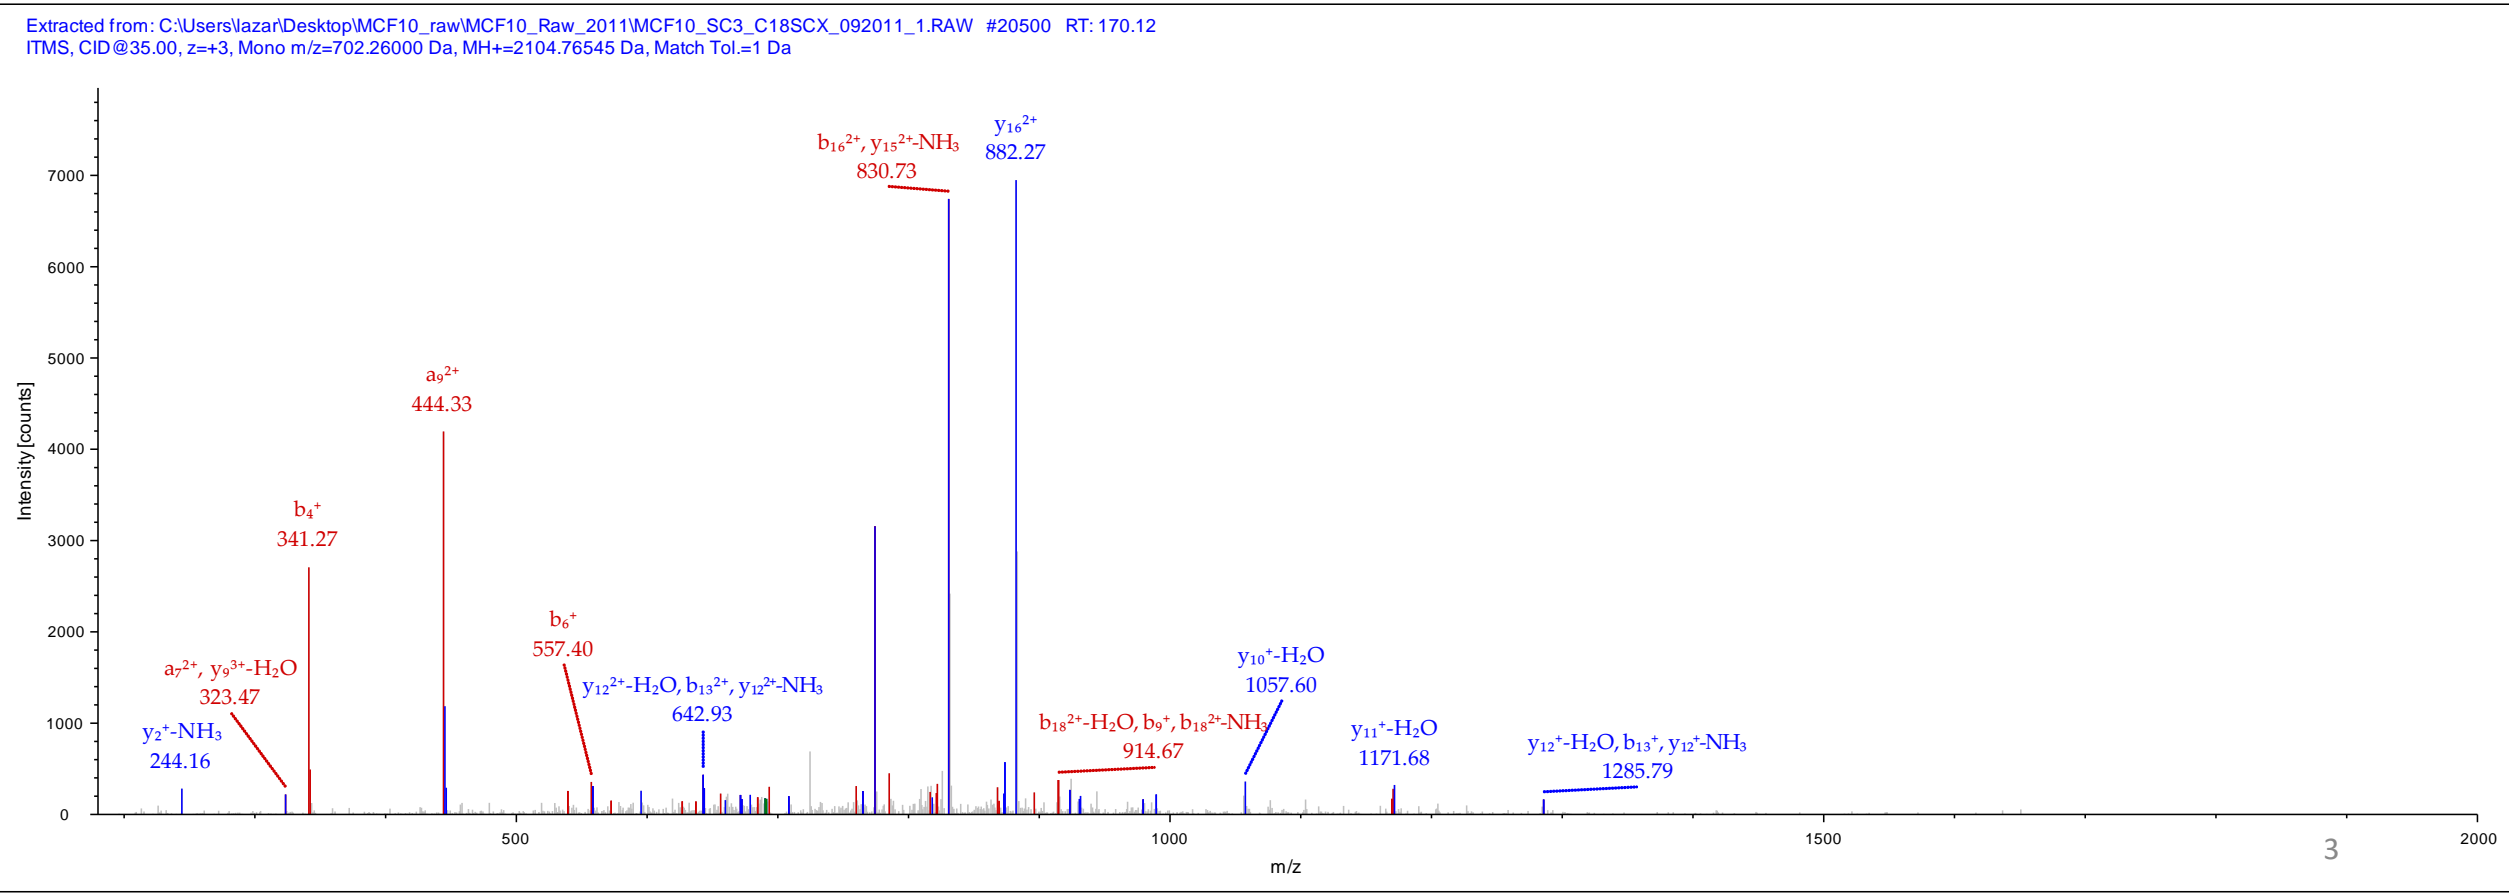

Sequence: AINQSQSVQESLESLLQSIGEVEQNLE GK, Charge: +3, Monoisotopic m/z: 1054.04000 Da (+840.34 mmu/+797.25

ppm), MH+: 3160.10545 Da, RT: 205.58 min

Identified with: Sequest HT (v1.3); XCorr:6.26

Fragment match tolerance used for search: 1 Da

Fragments used for search: a; a-H<sub>2</sub>O; a-NH<sub>3</sub>; b; b-H<sub>2</sub>O; b-NH<sub>3</sub>; y; y-H<sub>2</sub>O; y-NH<sub>3</sub>

**Protein references** (1): p.A2547>?|KAINQSQ|Missense|COSMIC|Lung(1) OR sp|Q9UPN3-2,MACF1\_HUMAN Isoform 2 of Microtubule-actin cross-linking factor 1, isoforms

1/2/3/5|c.6133\_6134GC>AA|p.A2045>?|KAINQSQ|Missense|COSMIC|Lung(1) - [c.7639\_7640GC>AA] CANCER\_sp\_Q9UPN3-5,MACF1\_HUMAN Isoform 4 of Microtubule-actin cross-linking factor 1, isoforms 1/2/3/5

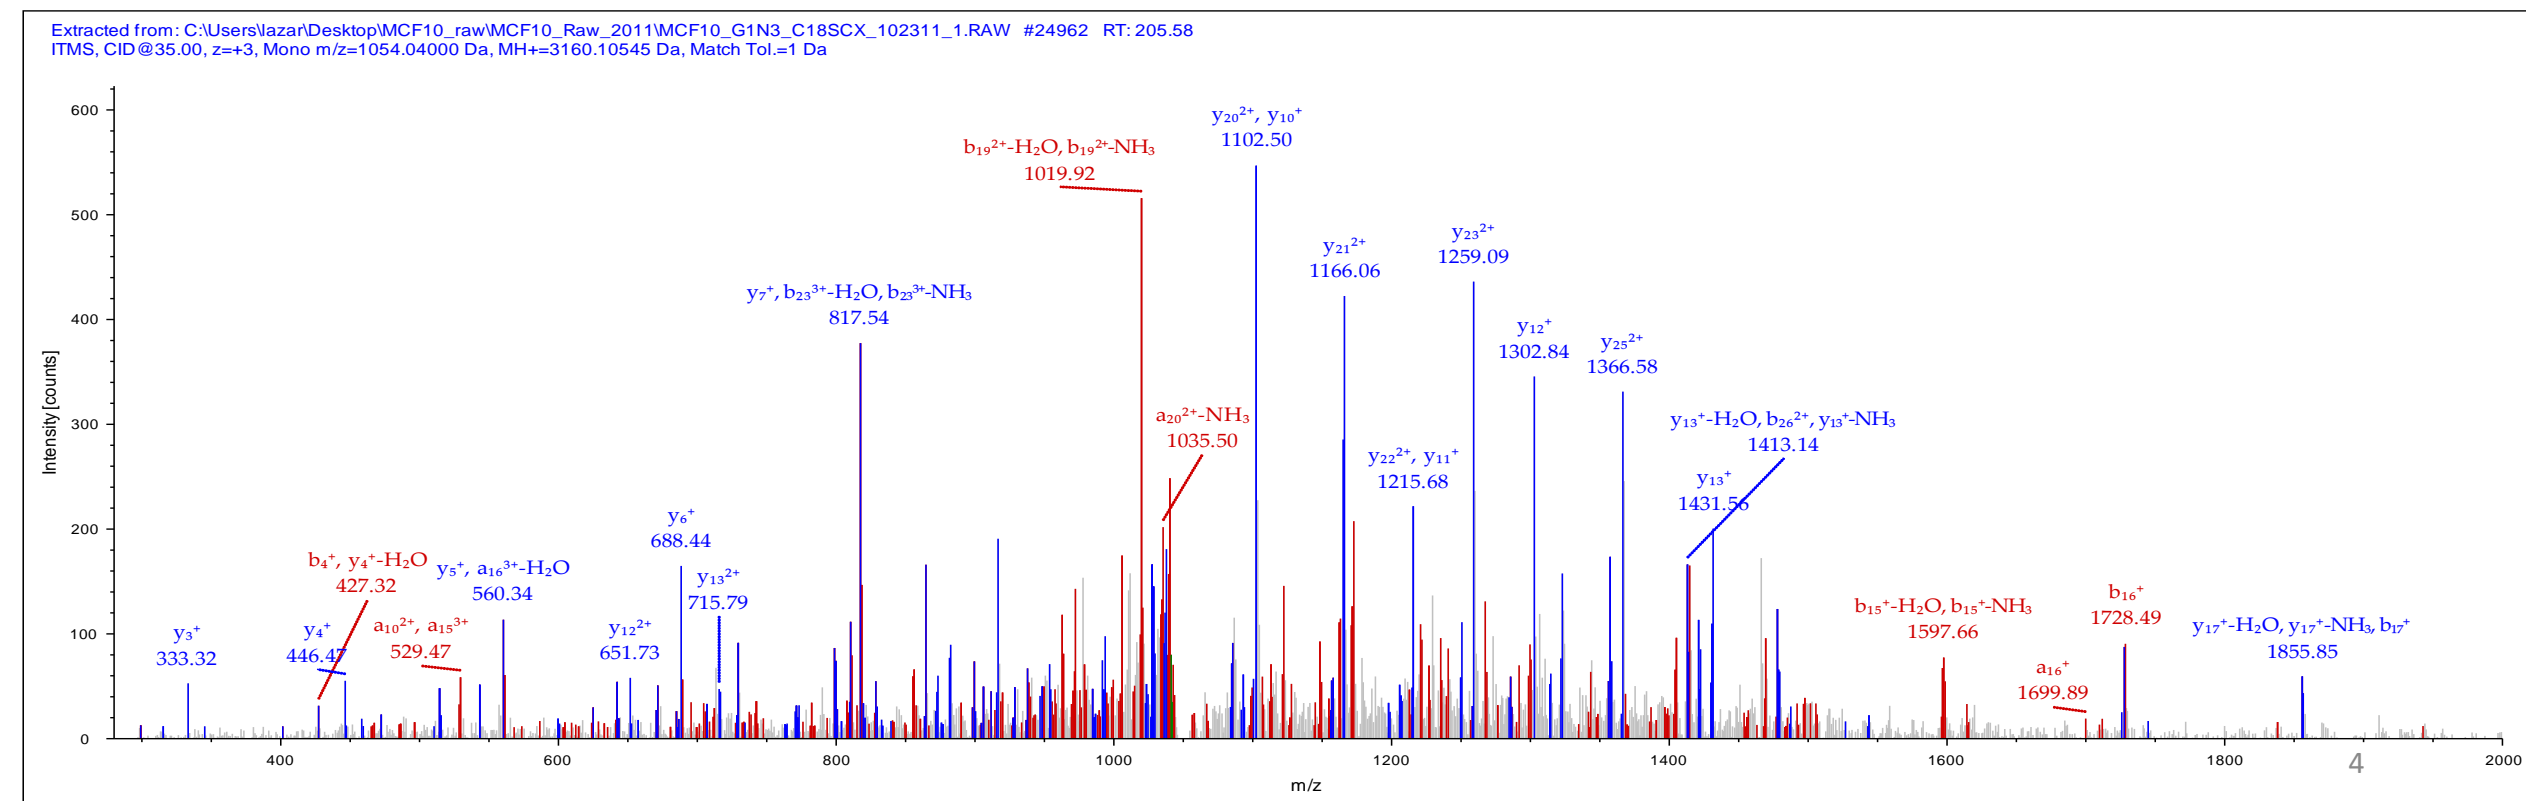

Sequence: ALMLQGVDLLDDAVAVTMGPK, Charge: +2, Monoisotopic m/z: 1080.84000 Da (+1772.42 mmu/+1639.86 ppm),

MH+: 2160.67272 Da, RT: 217.04 min

Identified with: Sequest HT (v1.3); XCorr:4.11

Fragment match tolerance used for search: 1 Da

Fragments used for search: a; a-H<sub>2</sub>O; a-NH<sub>3</sub>; b; b-H<sub>2</sub>O; b-NH<sub>3</sub>; y; y-H<sub>2</sub>O; y-NH<sub>3</sub>

**Protein references (1):** c.269C>A p.A90D|DLLDDAV|Missense|COSMIC|Lung(1) OR sp|P10809,CH60\_HUMAN 60 kDa heat shock protein, mitochondrial|c.143C>A|p.A48D|DLLDDAV|Missense|COSMIC|Lung(1) CANCER\_tr\_C9JL25,C9JL25\_HUMAN 60 kDa heat shock protein, mitochondrial (Fragment)

Extracted from: C:\Users\lazar\Desktop\MCF10\_raw\MCF10\_Raw\_2011\MCF10\_SC3\_C18SCX\_092111\_4.RAW #25978 RT: 217.04  
ITMS, CID@35.00, z=+2, Mono m/z=1080.84000 Da, MH+=2160.67272 Da, Match Tol.=1 Da

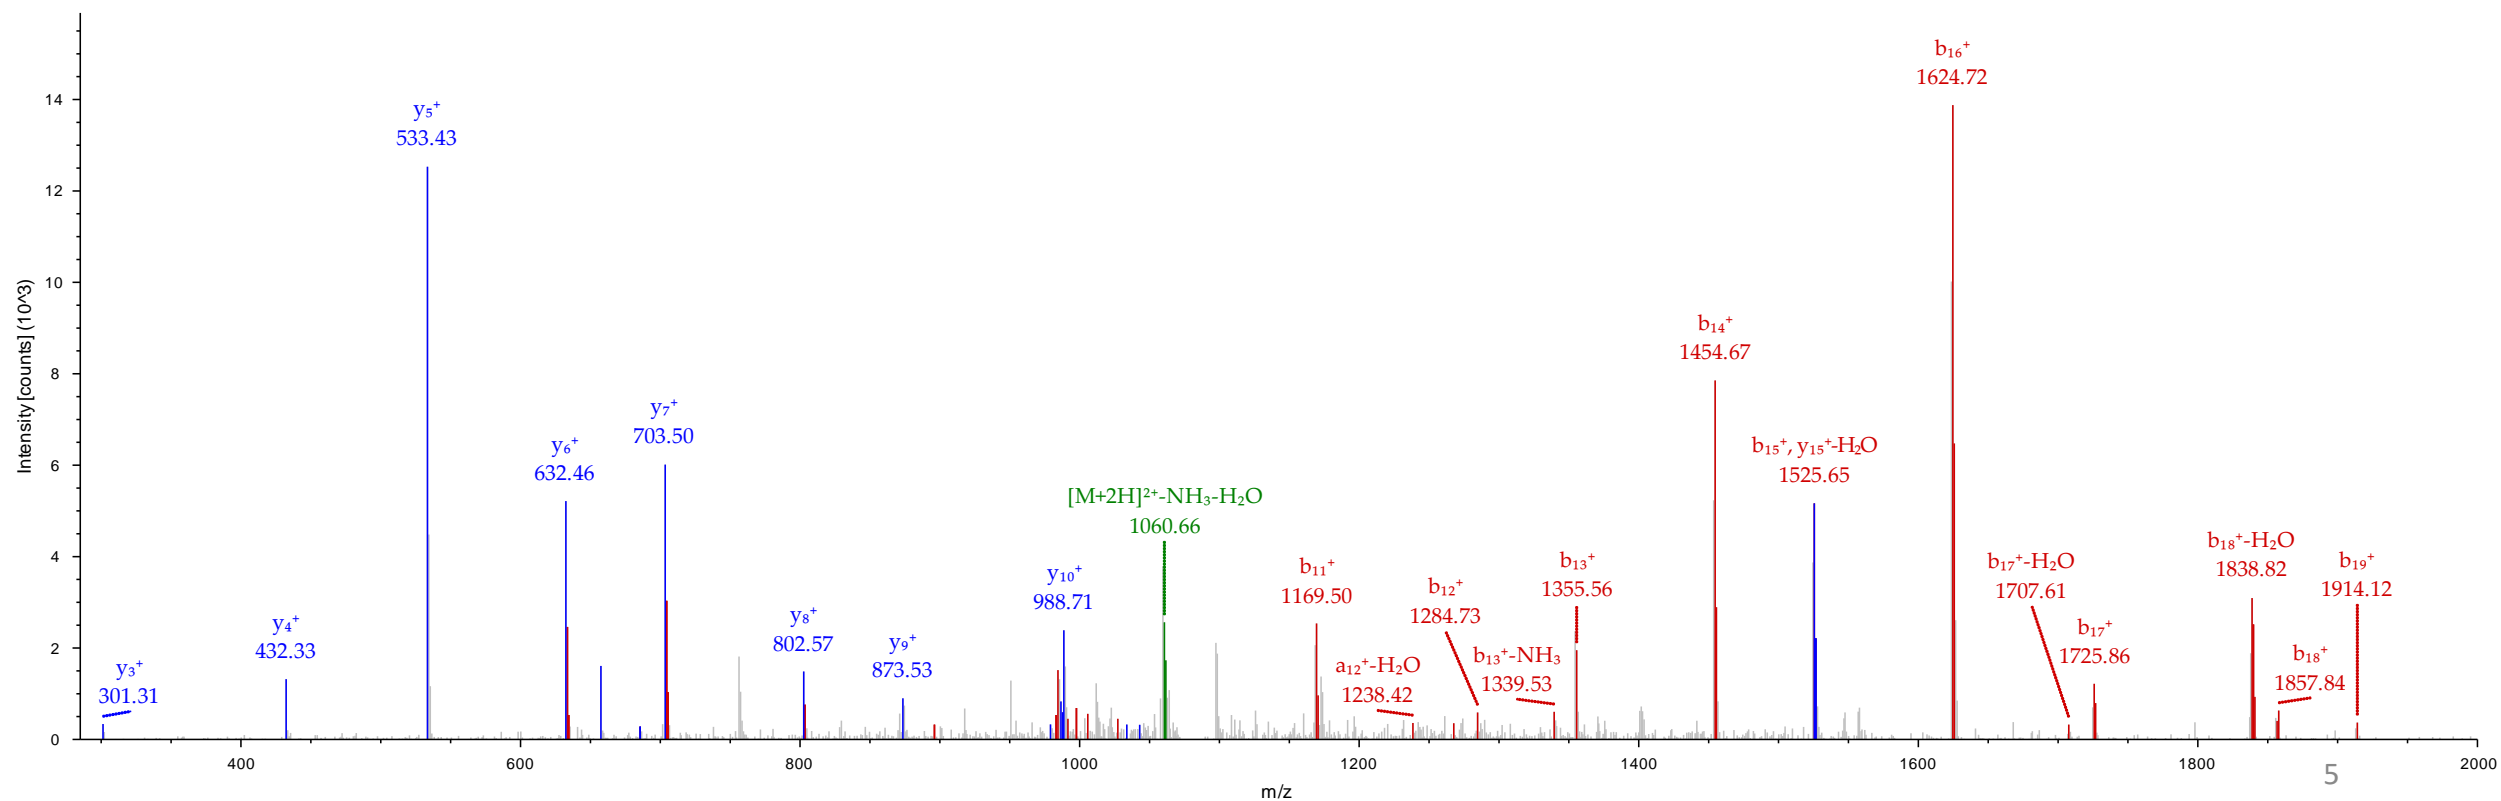

Sequence: AMQAAGQIPATALLPTMTPDGLSVTPVPVVGSMTR, Charge: +3, Monoisotopic m/z: 1269.46000 Da (+465.43 mmu/+366.64 ppm), MH+: 3806.36545 Da, RT: 112.02 min

Identified with: Sequest HT (v1.3); XCorr:4.92

Fragment match tolerance used for search: 1 Da

Fragments used for search: a; a-H<sub>2</sub>O; a-NH<sub>3</sub>; b; b-H<sub>2</sub>O; b-NH<sub>3</sub>; y; y-H<sub>2</sub>O; y-NH<sub>3</sub>

**Protein references** (1): c.391G>T p.A131S|DGLSVTP|Missense|COSMIC|Lung(1) CANCER\_sp\_P26368,U2AF2\_HUMAN Splicing factor U2AF 65 kDa subunit

Extracted from: C:\Users\lazar\Desktop\MCF7\_raw\MCF7\_G1S\_2009\MCF7\_G1N1\_C18SCX\_112309\_1.RAW #13779 RT: 112.02  
ITMS, CID@35.00, z=+3, Mono m/z=1269.46000 Da, MH+=3806.36545 Da, Match Tol.=1 Da

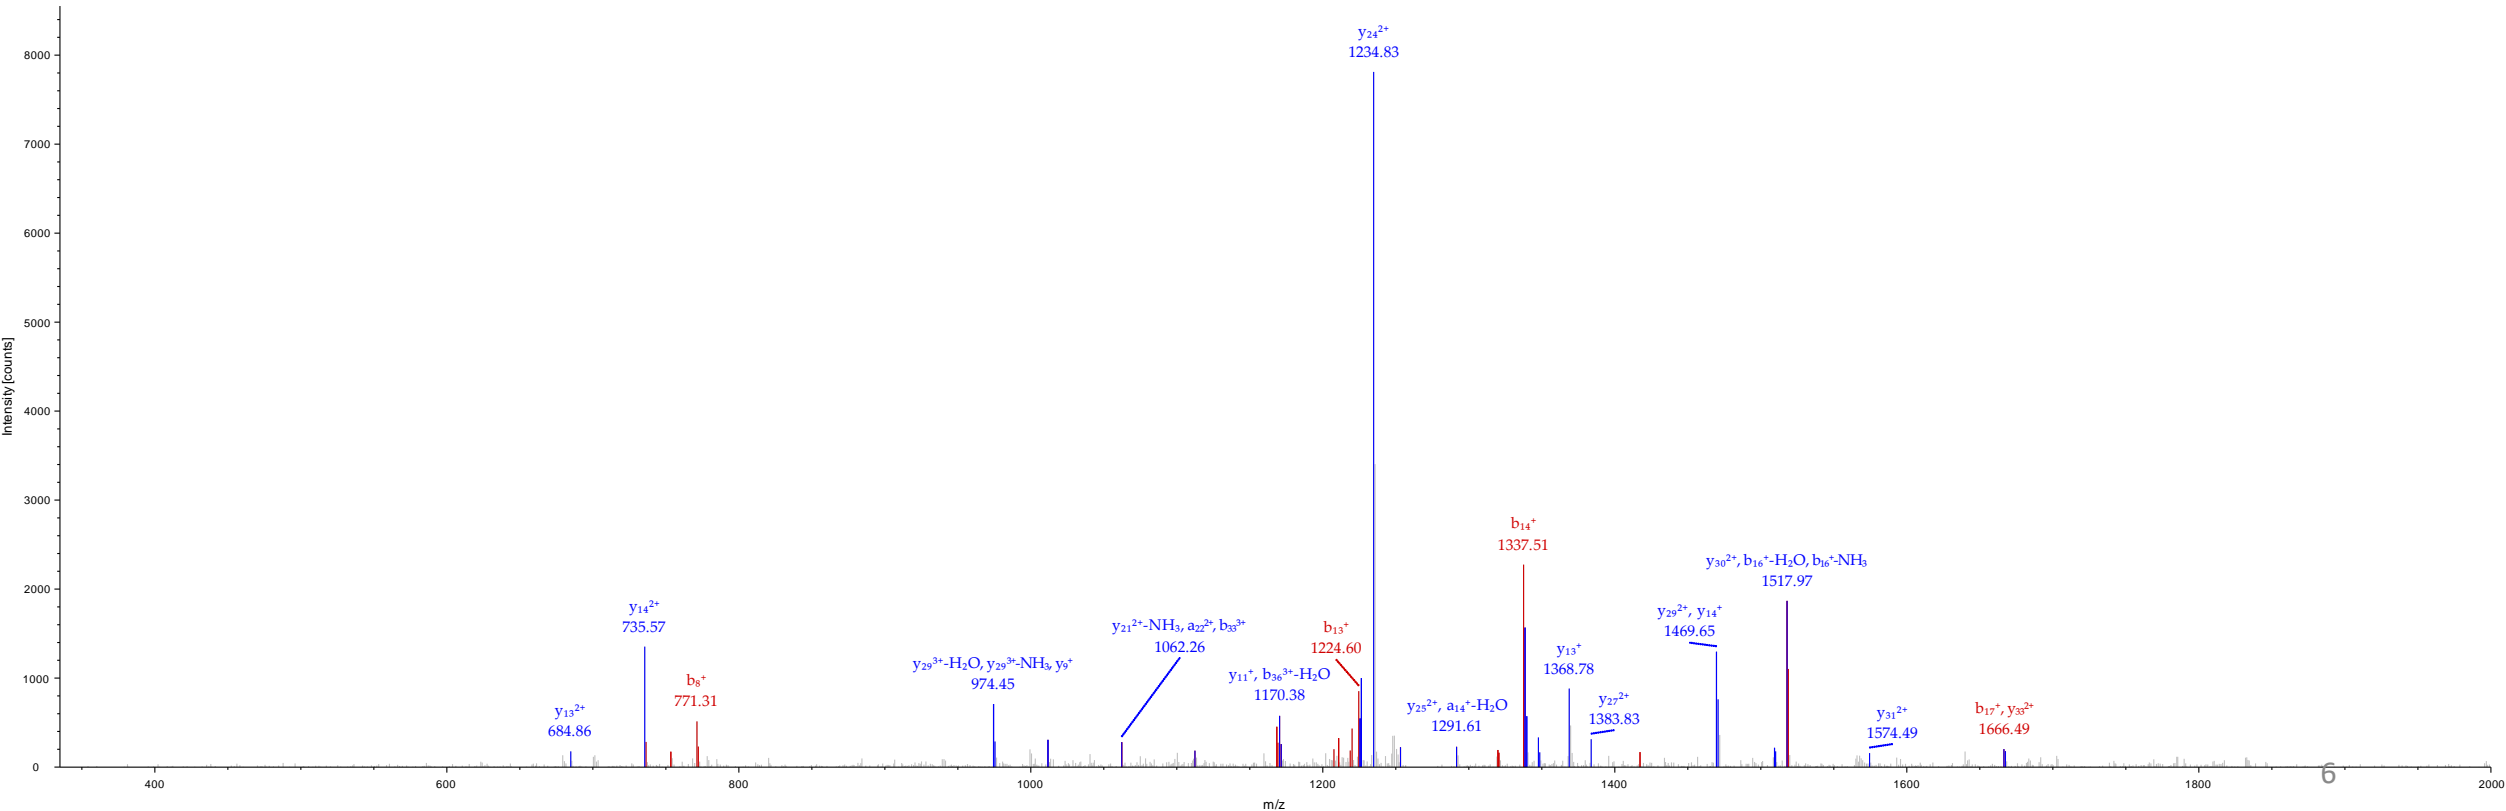

Sequence: ASTVKSVLELIPELNEKGEAYNSLMK, Charge: +3, Monoisotopic m/z: 954.88000 Da (-295.82 mmu/-309.79 ppm), MH+: 2862.62545 Da, RT: 175.52 min

Identified with: Sequest HT (v1.3); XCorr:4.38

Fragment match tolerance used for search: 1 Da

Fragments used for search: a; a-H<sub>2</sub>O; a-NH<sub>3</sub>; b; b-H<sub>2</sub>O; b-NH<sub>3</sub>; y; y-H<sub>2</sub>O; y-NH<sub>3</sub>

**Protein references** (1): c.3953A>G p.E1318G | NEKGEAY | Missense | COSMIC | Liver(2) CANCER\_sp\_P42704, LPPRC\_HUMAN  
Leucine-rich PPR motif-containing protein, mitochondrial

Extracted from: C:\Users\lazar\Desktop\MCF7\_raw\MCF7\_G1S\_2009\MCF7\_SC2\_C18SCX\_121109\_1.RAW #20163 RT: 175.52  
ITMS, CID@35.00, z=+3, Mono m/z=954.88000 Da, MH+=2862.62545 Da, Match Tol.=1 Da

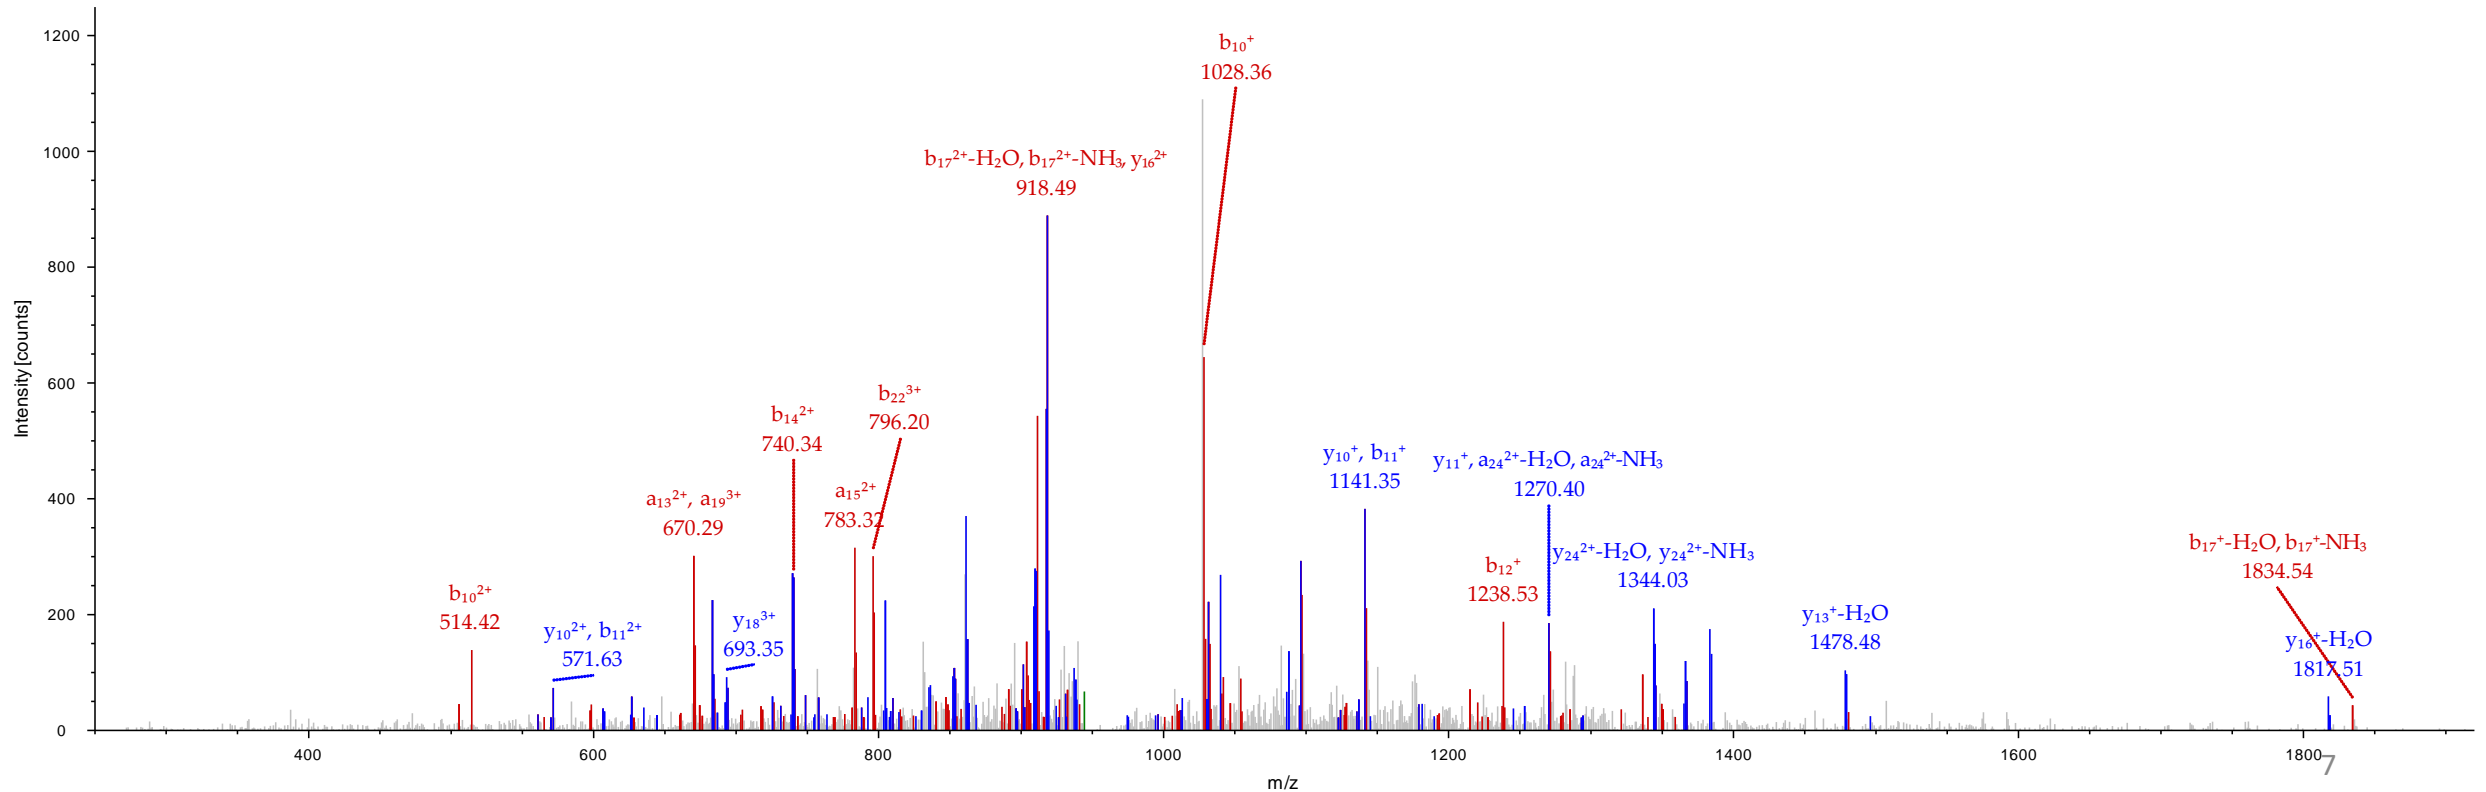

Sequence: CAPLFSGTEHHASLIDSLHTVYRLSK, Charge: +3, Monoisotopic m/z: 999.54000 Da (+353.41 mmu/+353.57 ppm), MH+: 2996.60545 Da, RT: 106.52 min

Identified with: Sequest HT (v1.3); XCorr:4.41

Fragment match tolerance used for search: 1 Da

Fragments used for search: a; a-H<sub>2</sub>O; a-NH<sub>3</sub>; b; b-H<sub>2</sub>O; b-NH<sub>3</sub>; y; y-H<sub>2</sub>O; y-NH<sub>3</sub>

**Protein references** (1): c.7606G>T p.A2536S | PLFSGTE | Missense | COSMIC | Lung(1) CANCER\_sp\_Q92736,RYR2\_HUMAN Ryanodine receptor 2

Extracted from: C:\Users\lazar\Desktop\MCF7\_raw\MCF7\_G1S\_2009\MCF7\_SN2\_C18SCX\_121109\_5.RAW #12866 RT: 106.52  
ITMS, CID@35.00, z=+3, Mono m/z=999.54000 Da, MH+=2996.60545 Da, Match Tol.=1 Da

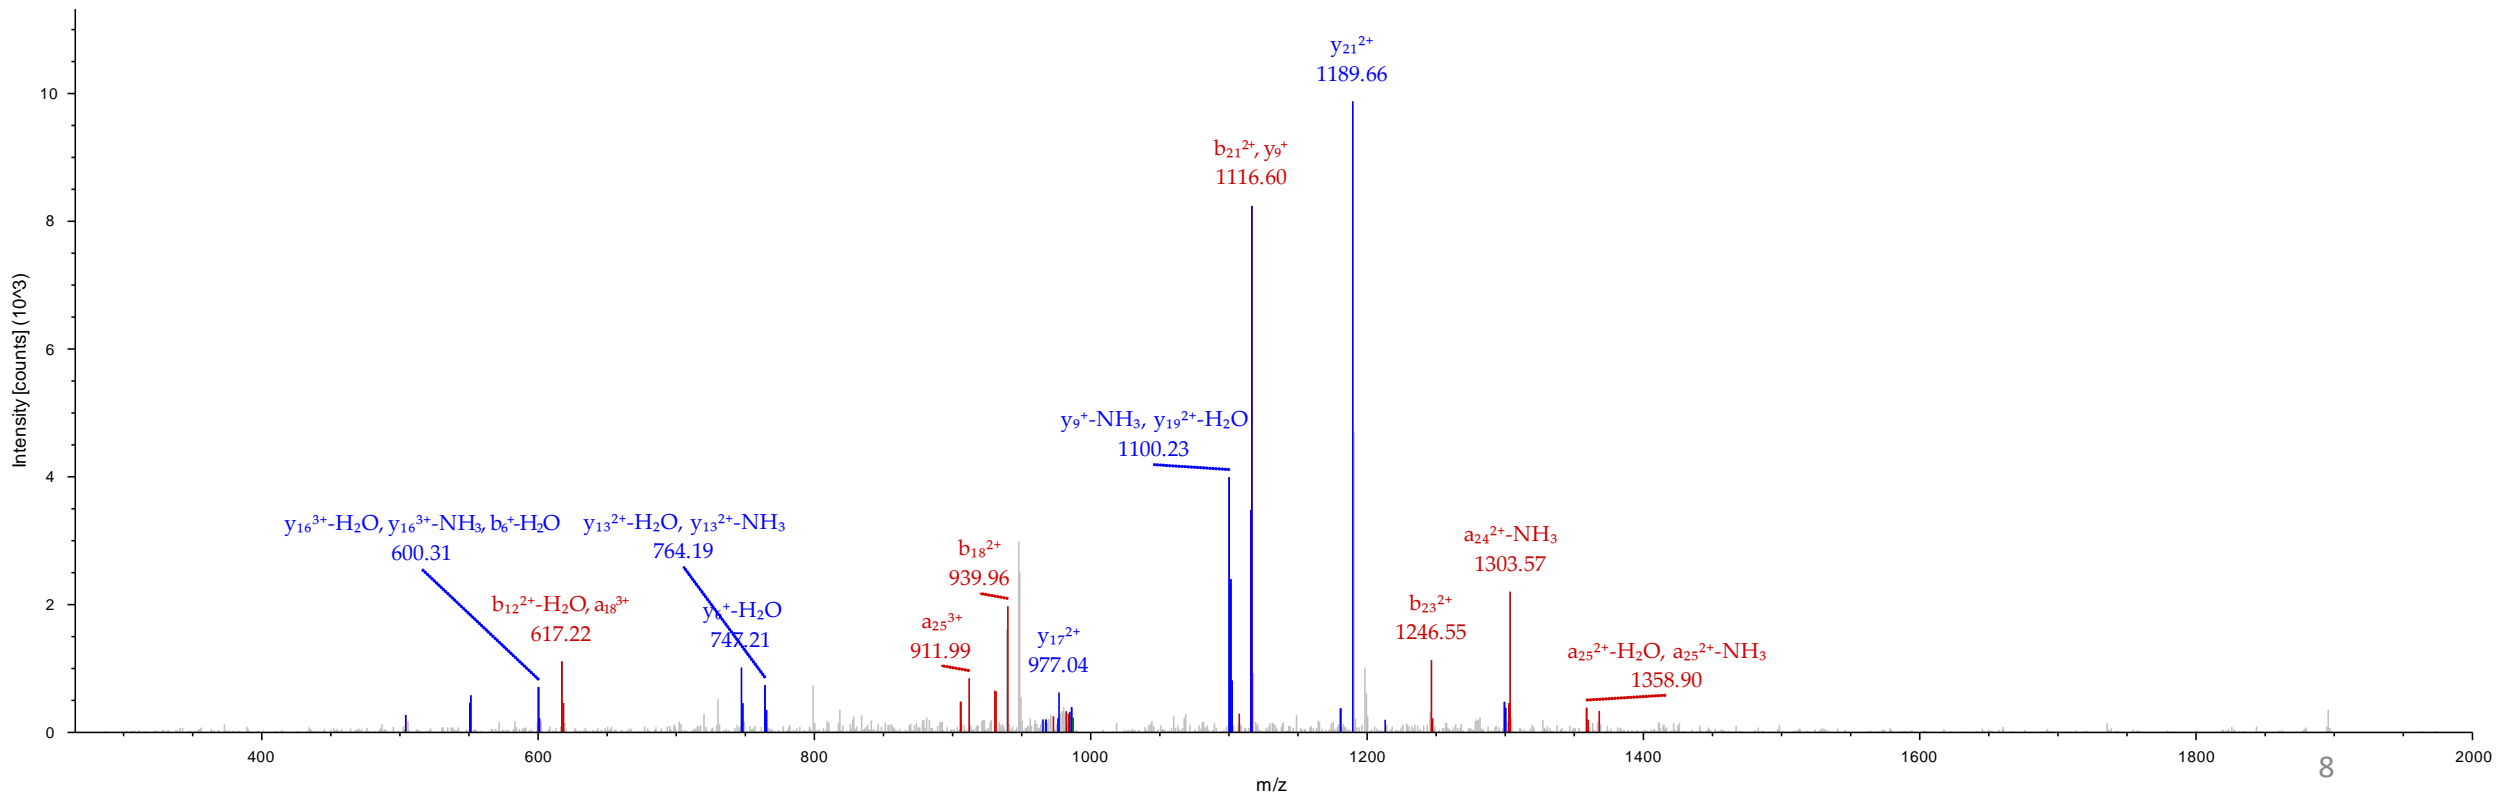



Sequence: CQEKWDKLLLTSTEK, Charge: +2, Monoisotopic m/z: 913.32000 Da (+1846.58 mmu/+2021.84 ppm), MH+: 1825.63272 Da, RT: 115.09 min

Identified with: Sequest HT (v1.3); XCorr:4.05

Fragment match tolerance used for search: 1 Da

Fragments used for search: a; a-H<sub>2</sub>O; a-NH<sub>3</sub>; b; b-H<sub>2</sub>O; b-NH<sub>3</sub>; y; y-H<sub>2</sub>O; y-NH<sub>3</sub>

**Protein references** (1): c.785A>G p.Y262C|VKRCQEK|Missense|COSMIC|Large intestine(1);Ovary(1)

CANCER\_sp\_Q7L0Y3,MRRP1\_HUMAN Mitochondrial ribonuclease P protein 1

Extracted from: C:\Users\lazar\Desktop\MCF10\_raw\MCF10\_Raw\_2011\MCF10\_SN1\_C18SCX\_092811\_dil\_2.RAW #13737 RT: 115.09  
ITMS, CID@35.00, z=+2, Mono m/z=913.32000 Da, MH+=1825.63272 Da, Match Tol.=1 Da

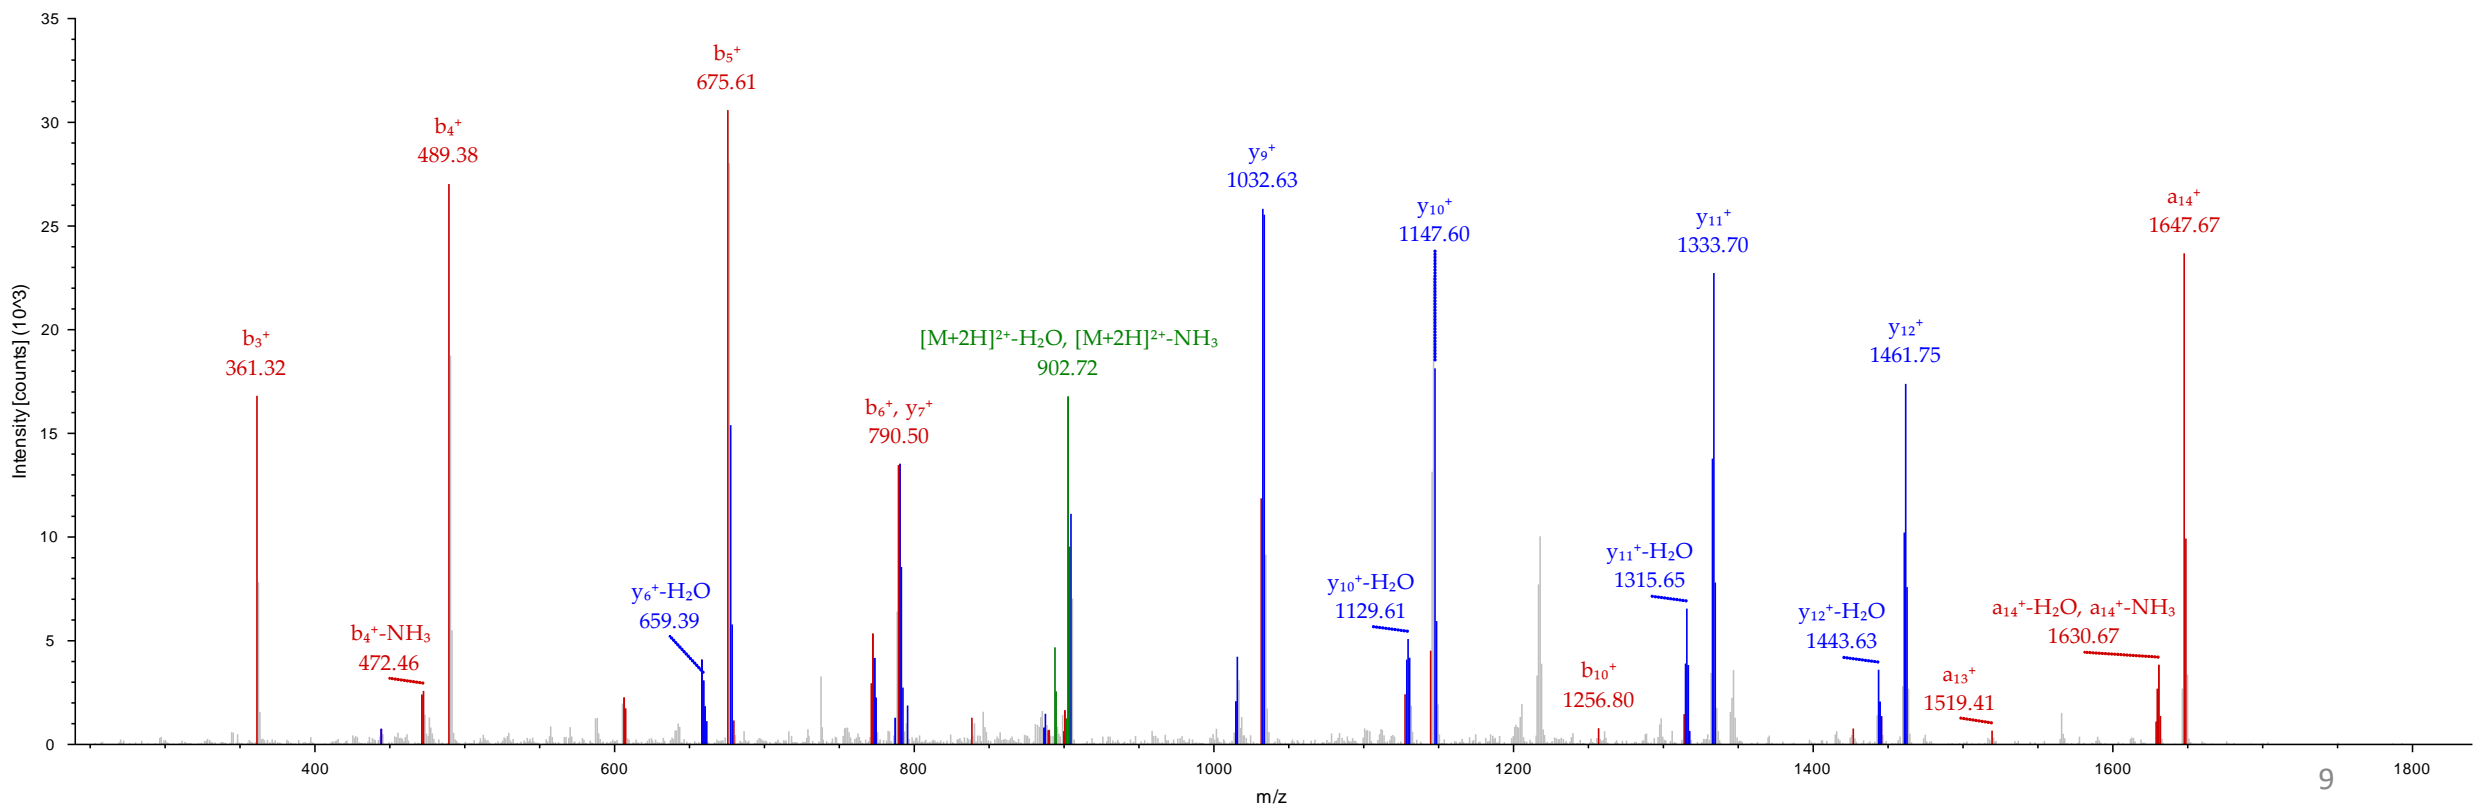

Sequence: DDLQFLADLEELITKFQVFRISQR, Charge: +3, Monoisotopic m/z: 975.06000 Da (-462.43 mmu/-474.25 ppm), MH+: 2923.16545 Da, RT: 199.91 min

Identified with: Sequest HT (v1.3); XCorr:4.35

Fragment match tolerance used for search: 1 Da

Fragments used for search: a; a-H<sub>2</sub>O; a-NH<sub>3</sub>; b; b-H<sub>2</sub>O; b-NH<sub>3</sub>; y; y-H<sub>2</sub>O; y-NH<sub>3</sub>

**Protein references** (1): c.2913C>A p.H971Q|RISQRSY|Missense|COSMIC|Large intestine(1)

CANCER\_sp\_Q9Y6X0,SETBP\_HUMAN SET-binding protein

Extracted from: C:\Users\lazar\Desktop\MCF10\_raw\MCF10\_Raw\_2011\MCF10\_G1C1\_C18SCX\_101311\_3.RAW #22282 RT: 199.91  
ITMS, CID@35.00, z=+3, Mono m/z=975.06000 Da, MH+=2923.16545 Da, Match Tol.=1 Da

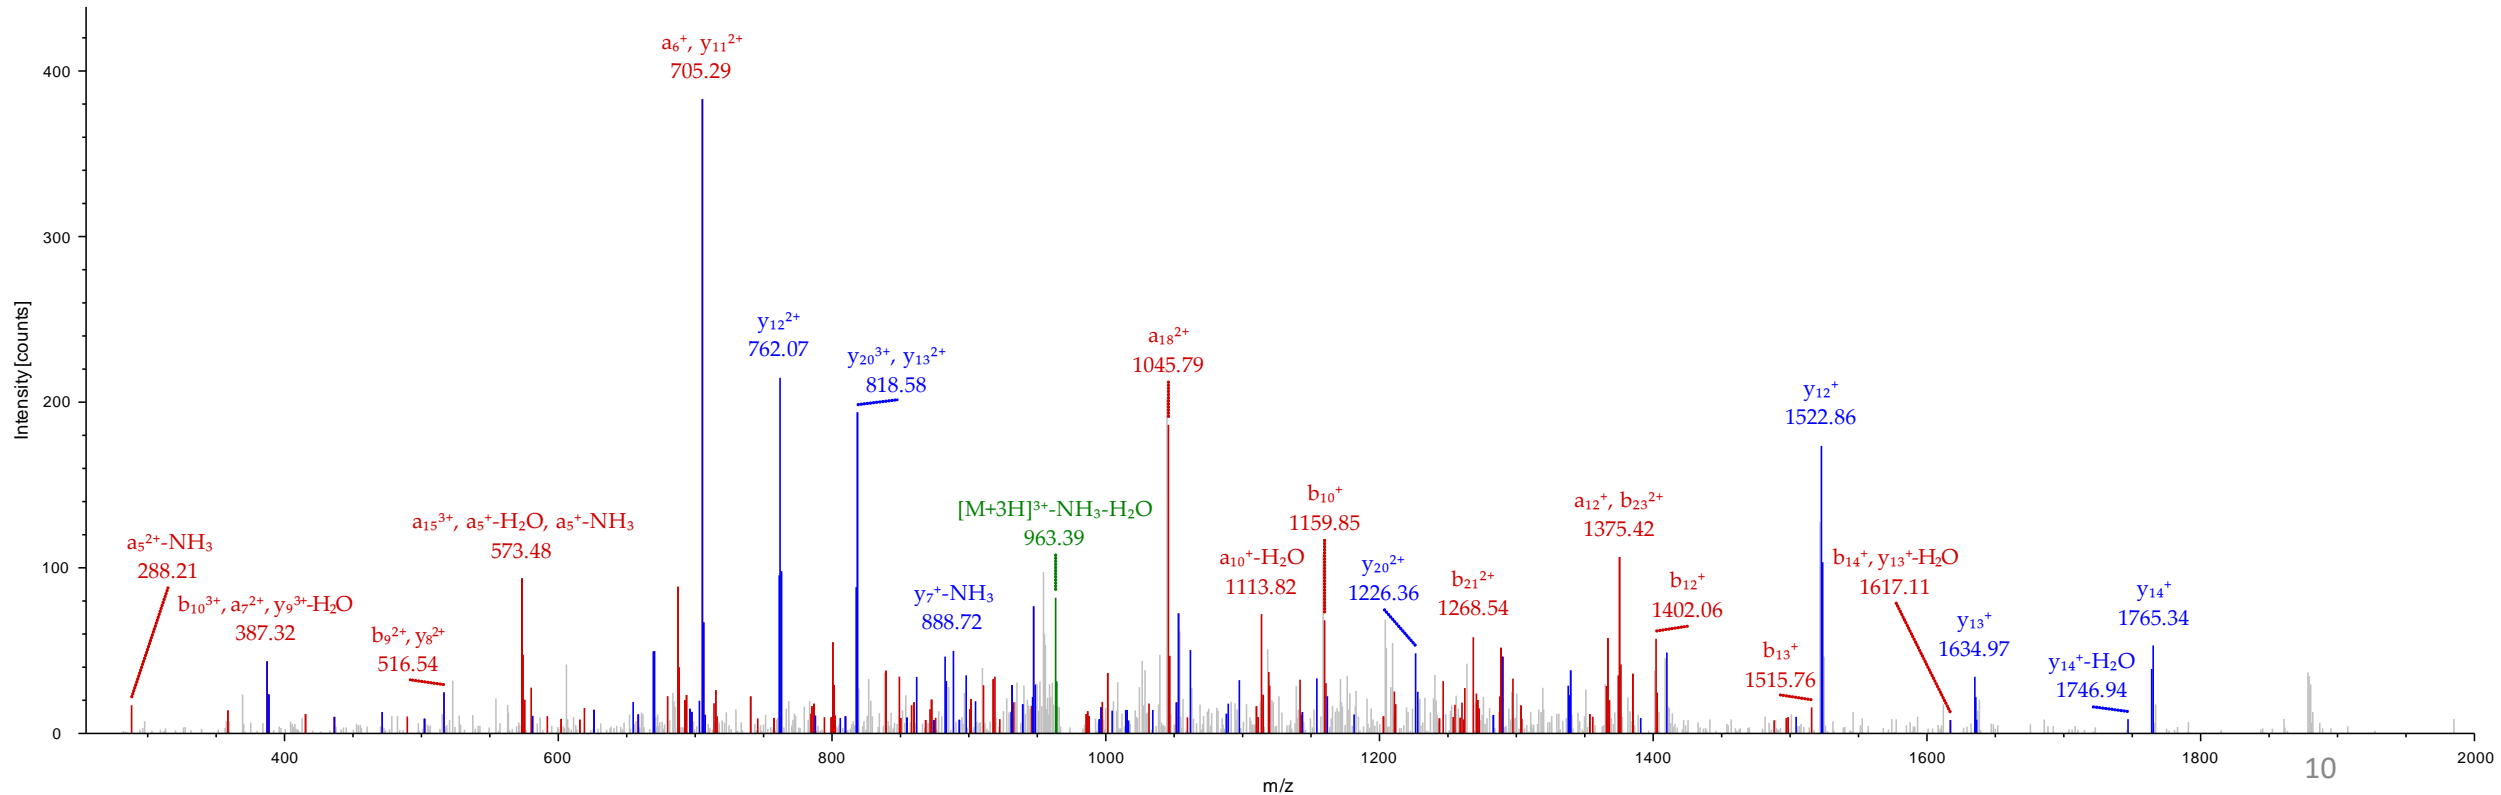

Sequence: DIMTYVSSFYHAFSGAQK, Charge: +2, Monoisotopic m/z: 1026.72000 Da (+239.88 mmu/+233.64 ppm), MH+: 2052.43272 Da, RT: 180.14 min

Identified with: Sequest HT (v1.3); XCorr:3.34

Fragment match tolerance used for search: 1 Da

Fragments used for search: a; a-H<sub>2</sub>O; a-NH<sub>3</sub>; b; b-H<sub>2</sub>O; b-NH<sub>3</sub>; y; y-H<sub>2</sub>O; y-NH<sub>3</sub>

**Protein references (1):** c.767C>A p.A256D|DEKDIMT|Missense|COSMIC|Ovary(1) CANCER\_sp\_O43707,ACTN4\_HUMAN Alpha-actinin-4

Extracted from: C:\Users\lazar\Desktop\MCF10\_raw\MCF10\_Raw\_2011\MCF10\_G1C3\_C18SCX\_122810\_5.RAW #20900 RT: 180.14  
ITMS, CID@35.00, z=+2, Mono m/z=1026.72000 Da, MH+=2052.43272 Da, Match Tol.=1 Da

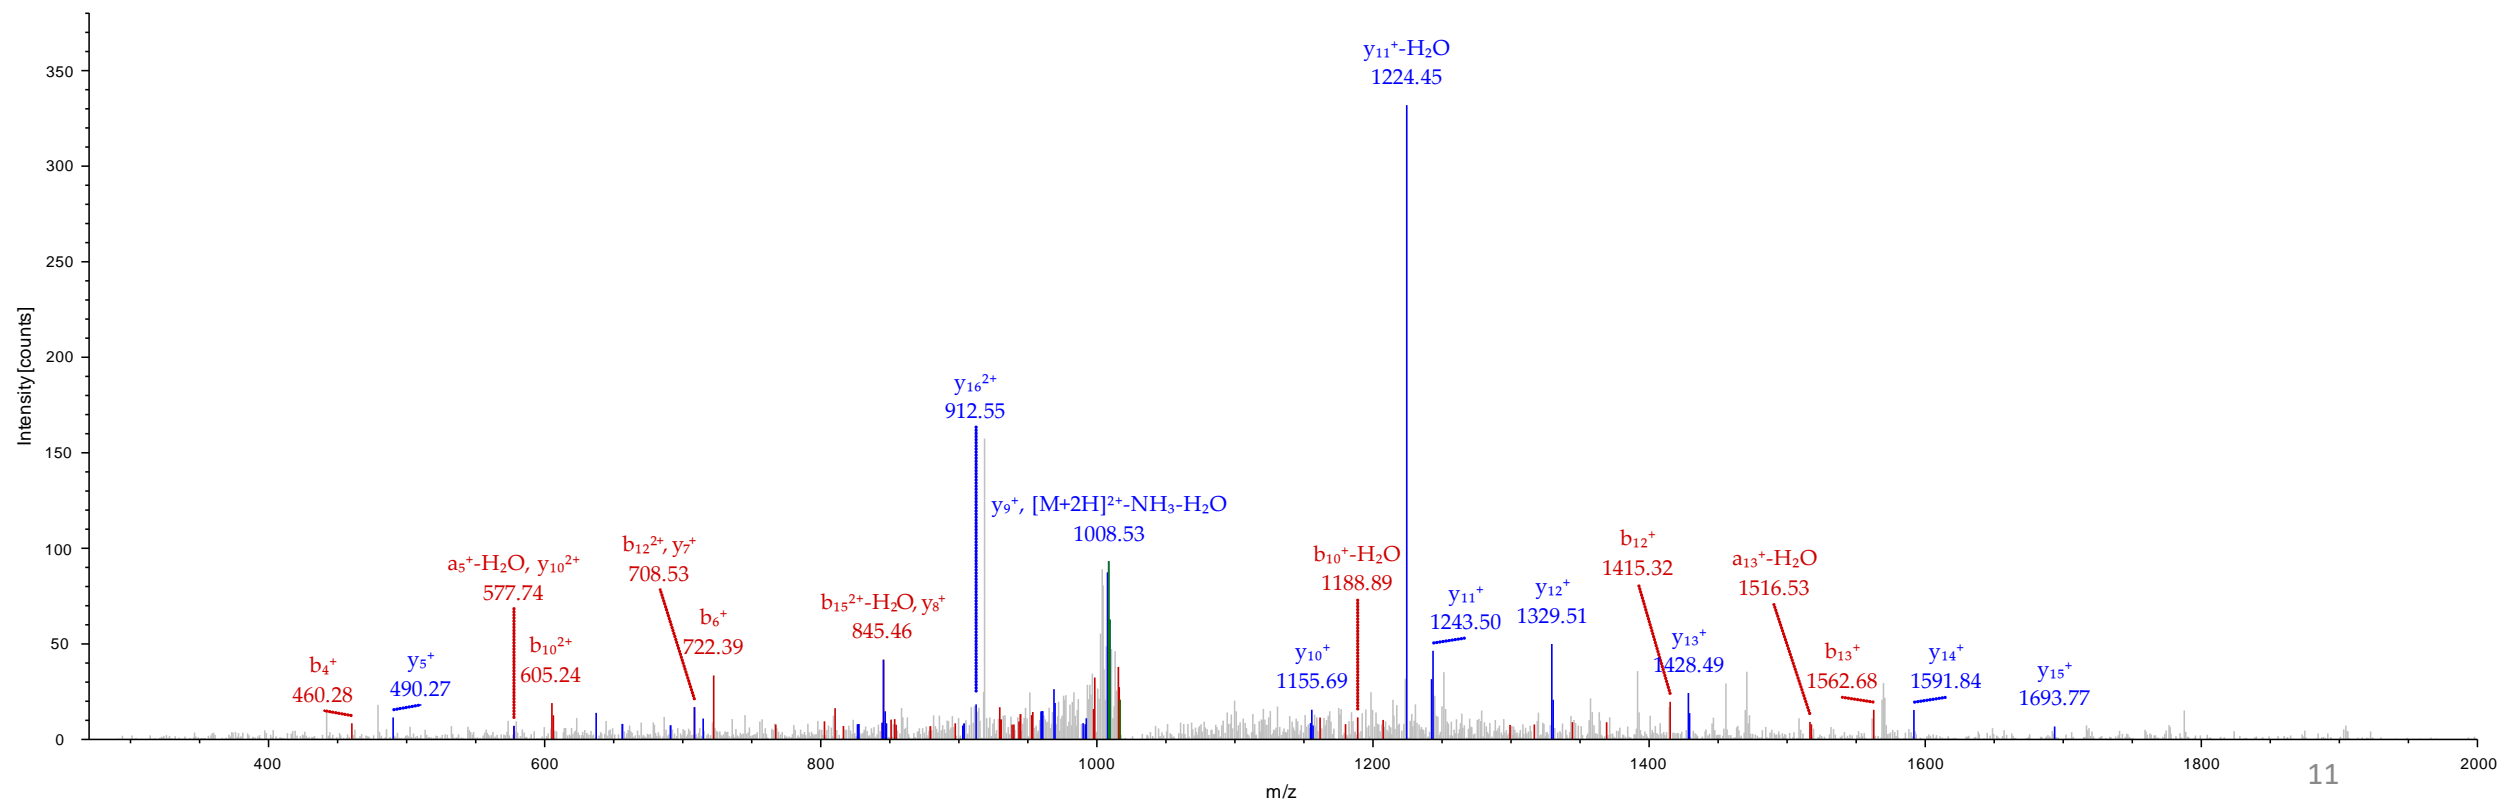

Sequence: DQEGQDLLLFDNIFR, Charge: +2, Monoisotopic m/z: 968.78000 Da (+285.93 mmu/+295.14 ppm), MH+: 1936.55272 Da, RT: 195.72 min,

Identified with: Sequest HT (v1.3); XCorr:4.66

Fragment match tolerance used for search: 1 Da

Fragments used for search: a; a-H<sub>2</sub>O; a-NH<sub>3</sub>; b; b-H<sub>2</sub>O; b-NH<sub>3</sub>; y; y-H<sub>2</sub>O; y-NH<sub>3</sub>

**Protein references** (1): c.901G>T p.V301L|GQDLLLF| Missense|COSMIC|Kidney(1) CANCER\_sp\_P06576,ATPB\_HUMAN ATP synthase subunit beta, mitochondrial

Extracted from: C:\Users\lazar\Desktop\SKBR3\_raw\SKBR3\_G1S\SKBR3\_SC2\_2uguL\_8uL4H\_DDA30\_LTQ\_051515\_70%\_2\_5.RAW #22799 RT: 195.72  
ITMS, CID@30.00, z=+2, Mono m/z=968.78000 Da, MH+=1936.55272 Da, Match Tol.=1 Da

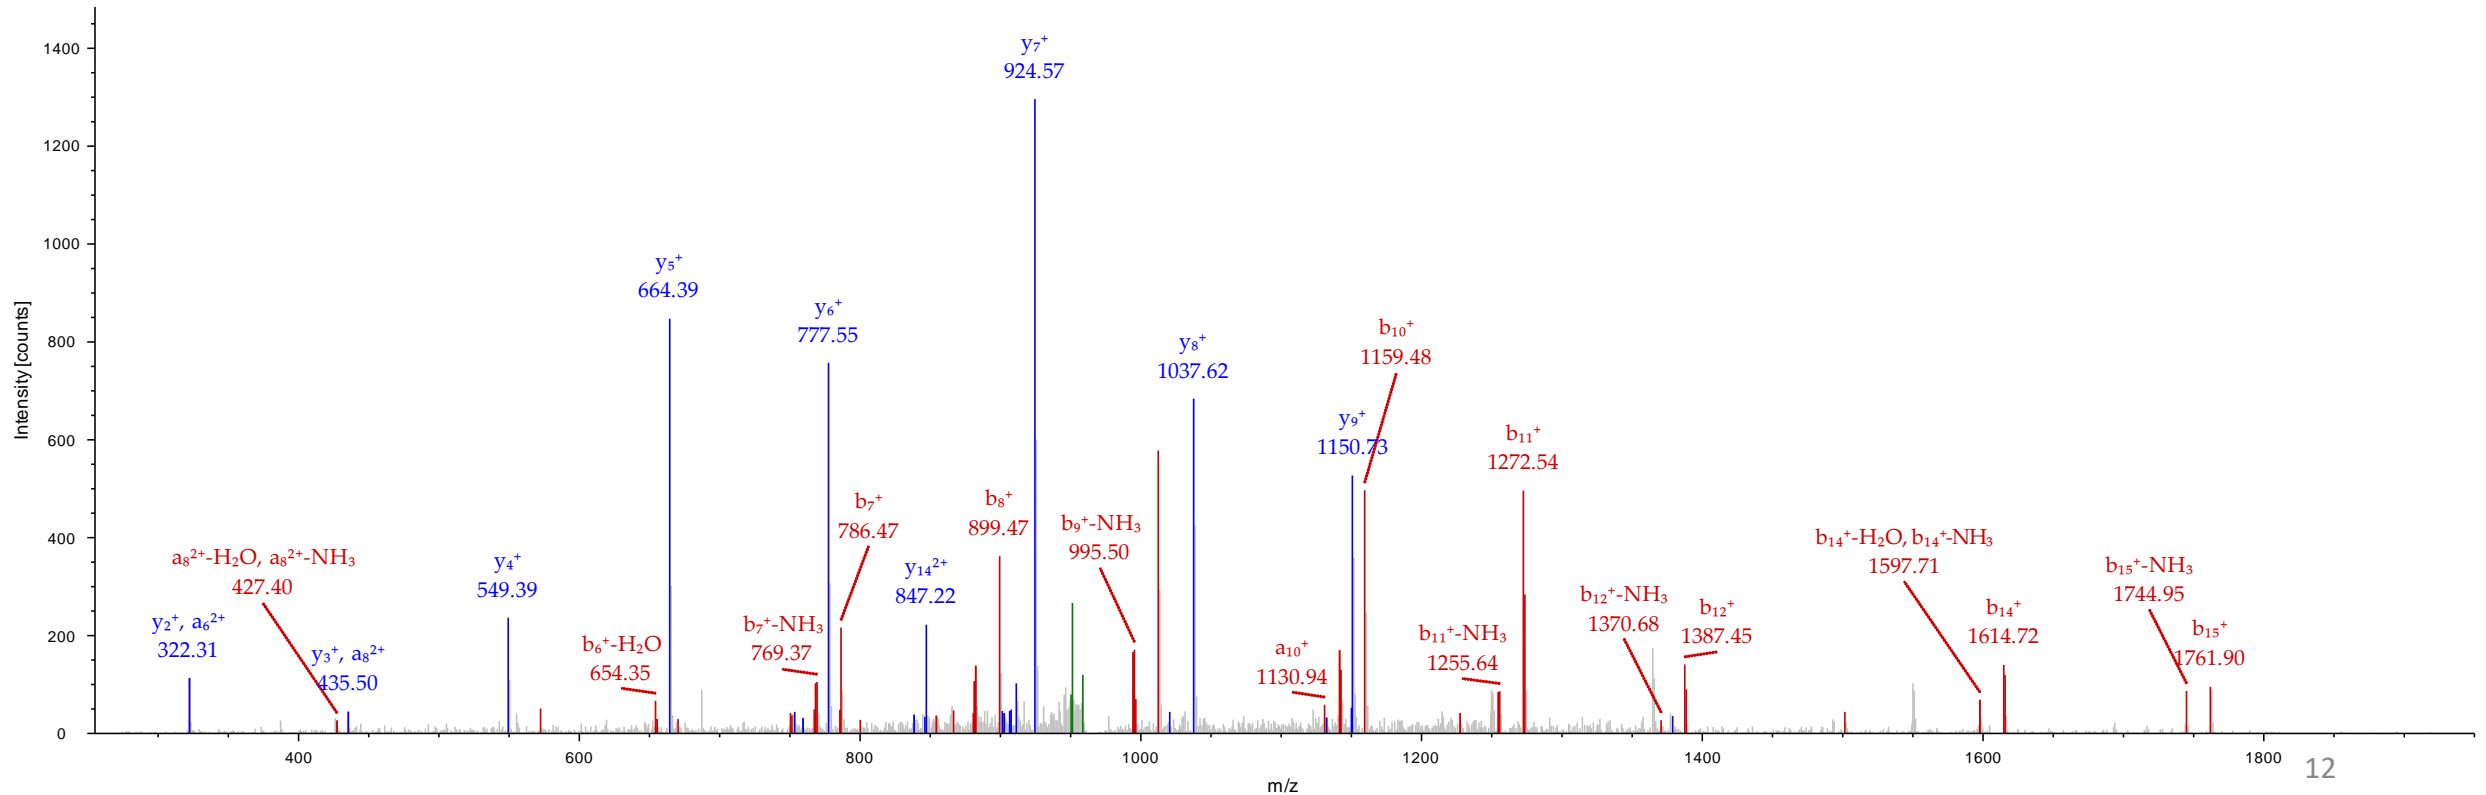

Sequence: EAMQQADDWLGIPQVITPEEIVDPNVDEHSVMTYMSQFPK, Charge: +3, Monoisotopic m/z: 1529.98000 Da (-70.18 mmu/-45.87 ppm), MH+: 4587.92545 Da, RT: 158.82 min

Identified with: Sequest HT (v1.3); XCorr:5.67

Fragment match tolerance used for search: 1 Da

Fragments used for search: a; a-H<sub>2</sub>O; a-NH<sub>3</sub>; b; b-H<sub>2</sub>O; b-NH<sub>3</sub>; y; y-H<sub>2</sub>O; y-NH<sub>3</sub>

**Protein references** (1): c.781C>A p.L261M|MTYMSQF|Missense|COSMIC|Pancreas(2) CANCER\_sp\_P21333,FLNA\_HUMAN

Filamin-A

Extracted from: C:\Users\lazar\Desktop\MCF10\_raw\MCF10\_Raw\_2011\MCF10\_SN3\_C18SCX\_092211\_3.RAW #19602 RT: 158.82  
ITMS, CID@35.00, z=+3, Mono m/z=1529.98000 Da, MH+=4587.92545 Da, Match Tol.=1 Da

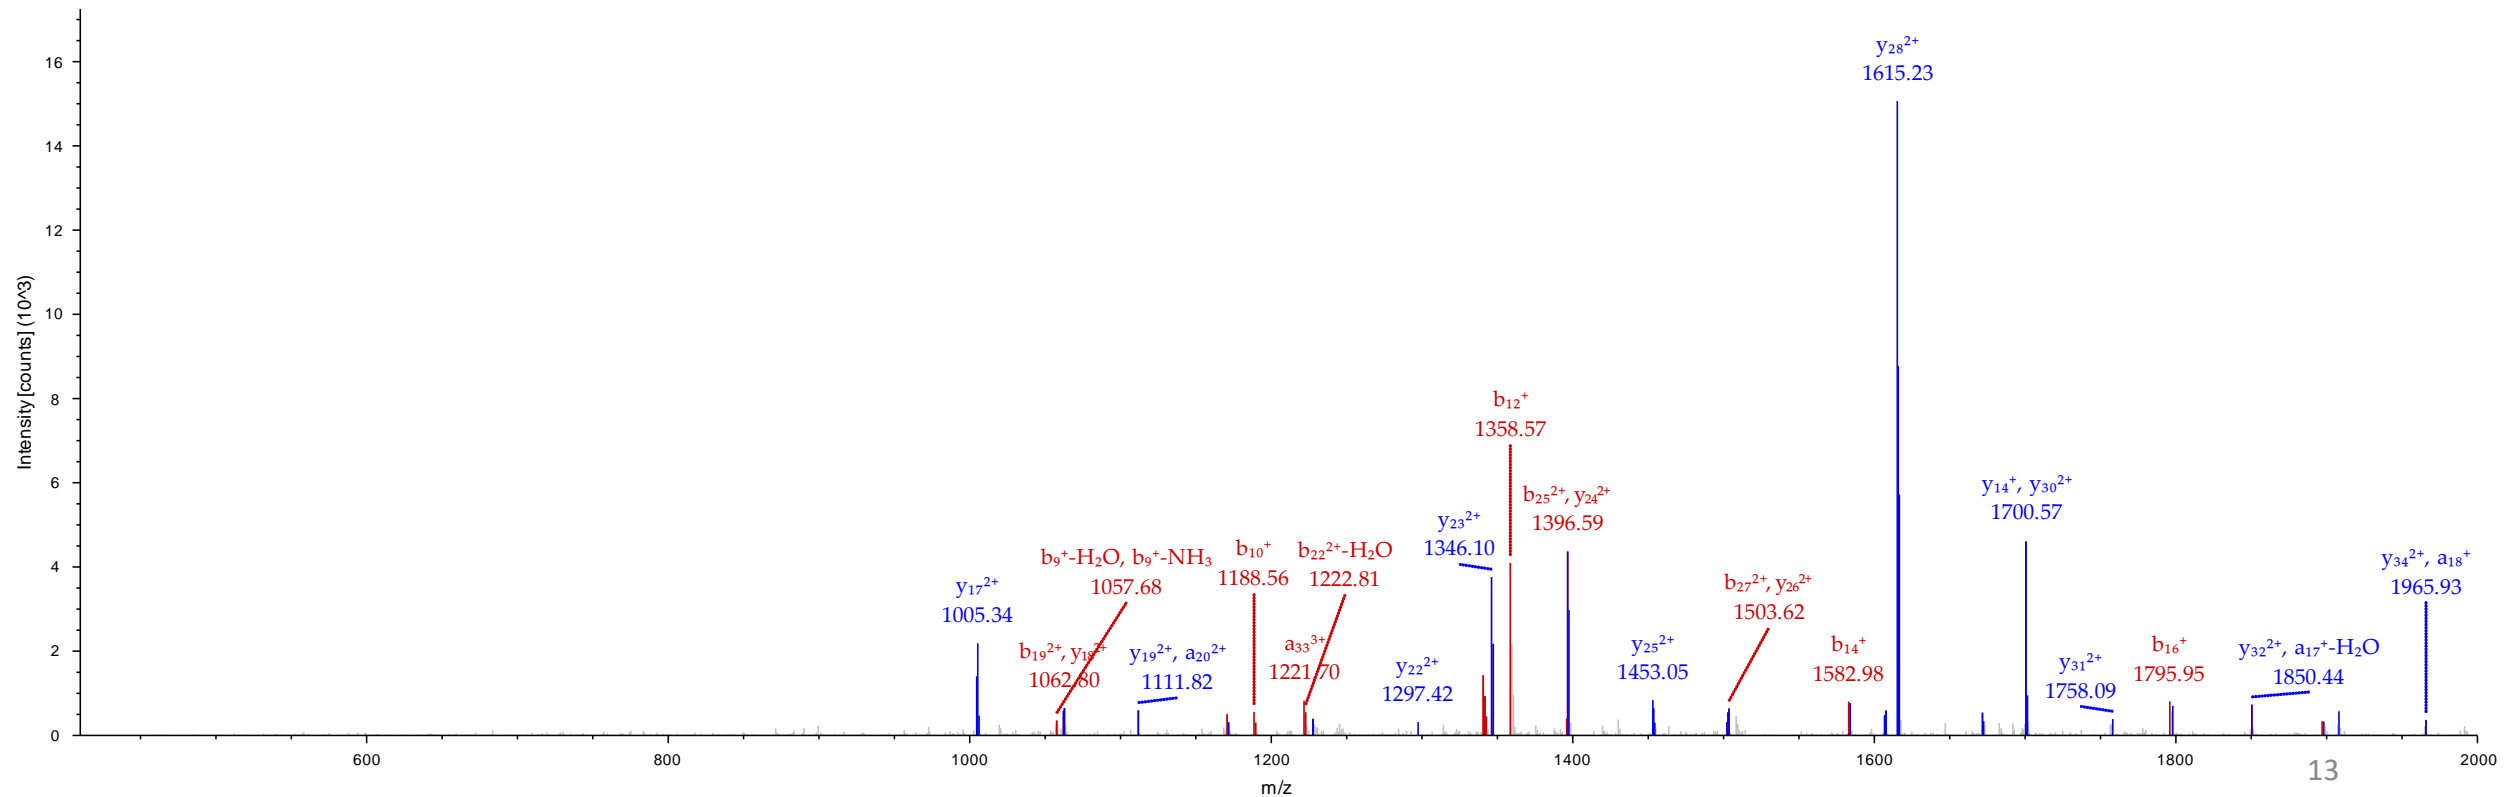

Sequence: EAVMSFSITETEKIK, Charge: +3, Monoisotopic m/z: 571.17108 Da (-460.18 mmu/-805.67 ppm), MH+: 1711.49869 Da, RT: 156.46 min

Identified with: Sequest HT (v1.3); XCorr:4.25

Fragment match tolerance used for search: 1 Da

Fragments used for search: a; a-H<sub>2</sub>O; a-NH<sub>3</sub>; b; b-H<sub>2</sub>O; b-NH<sub>3</sub>; y; y-H<sub>2</sub>O; y-NH<sub>3</sub>

**Protein references** (1): c.1058A>G p.N353S|AVMSFSI|Missense|COSMIC|Large intestine(1)

CANCER\_sp\_Q5T4T6,SYC2L\_HUMAN Synaptonemal complex protein 2-like

Extracted from: C:\Users\lazar\Desktop\MCF10\_raw\MCF10\_Raw\_2011\MCF10\_G1N1\_C18SCX\_100911\_2.RAW #18821 RT: 156.46  
ITMS, CID@35.00, z=+3, Mono m/z=571.17108 Da, MH+=1711.49869 Da, Match Tol.=1 Da

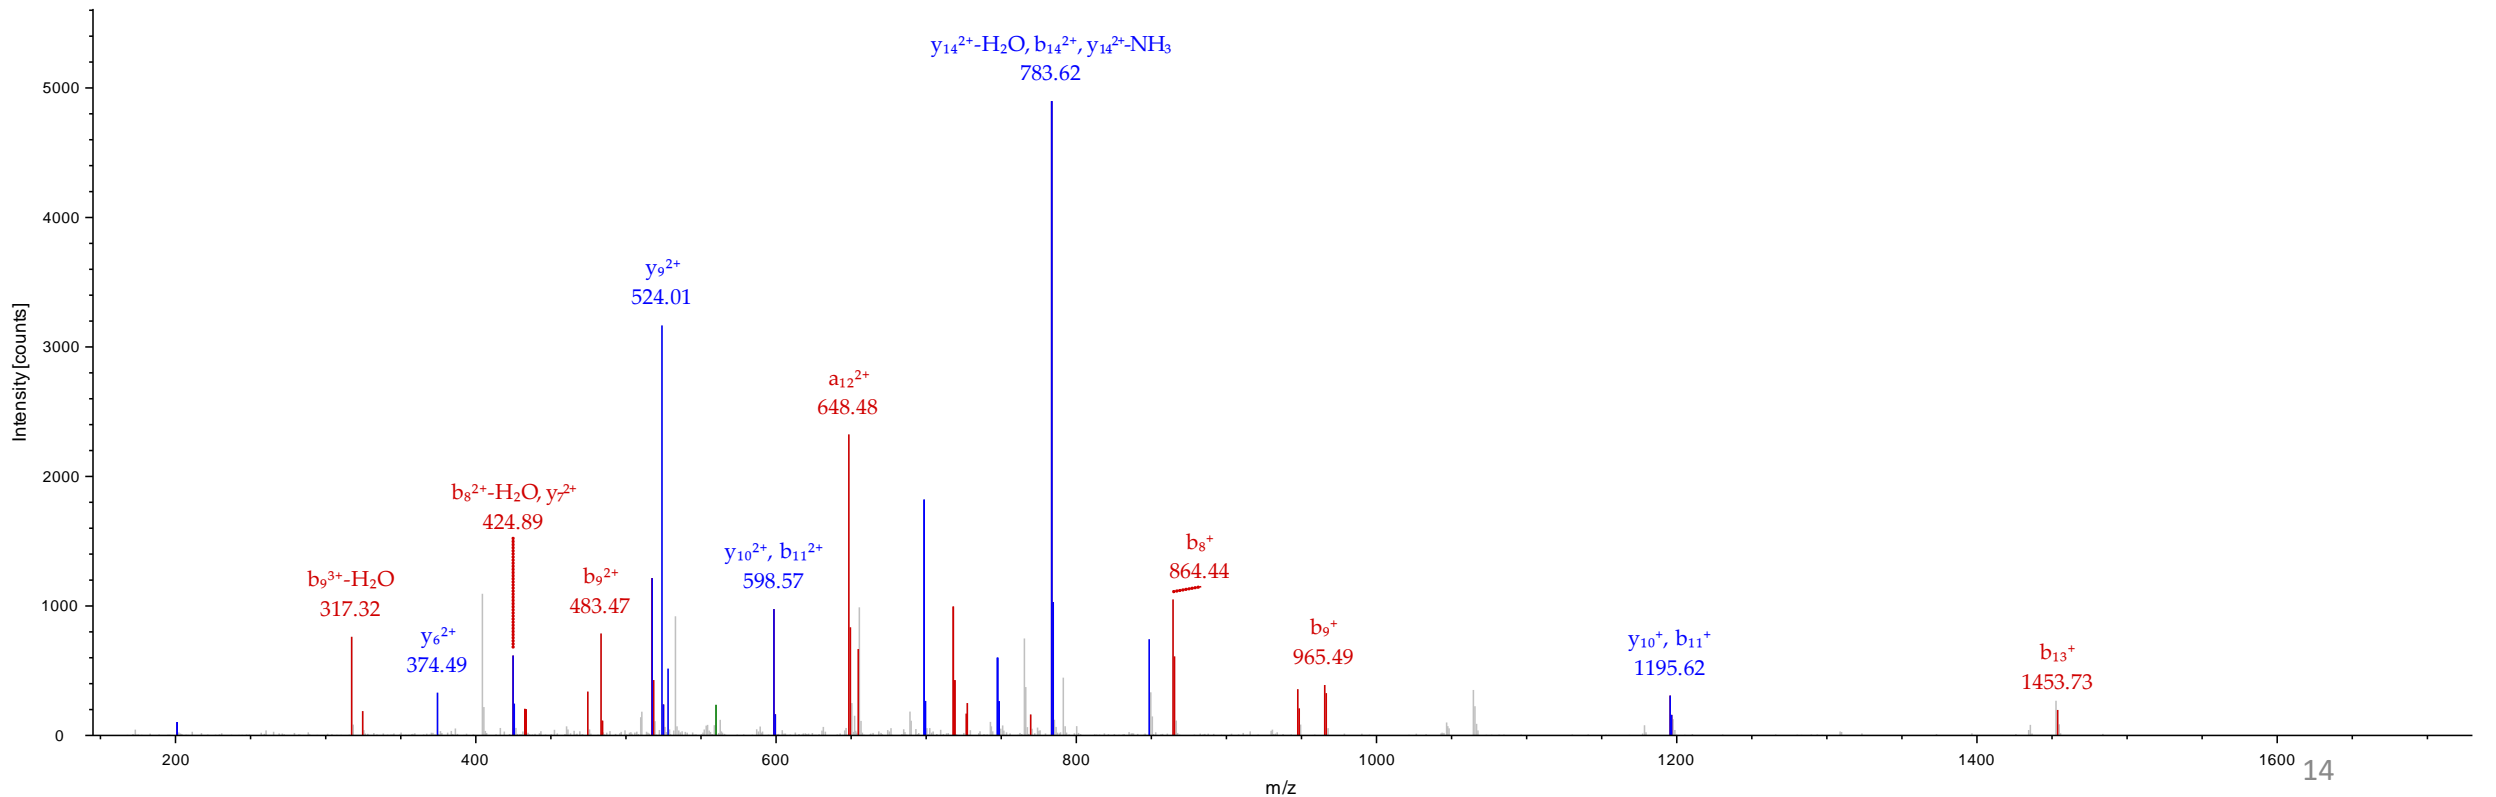

Sequence: EFADSLGIPFLETSAKNAMNVEQSFMTMAAEIK, Charge: +3, Monoisotopic m/z: 1207.28000 Da (-302.46 mmu/-250.53 ppm), MH+: 3619.82545 Da, RT: 204.55 min

Identified with: Sequest HT (v1.3); XCorr:4.59

Fragment match tolerance used for search: 1 Da

Fragments used for search: a; a-H<sub>2</sub>O; a-NH<sub>3</sub>; b; b-H<sub>2</sub>O; b-NH<sub>3</sub>; y; y-H<sub>2</sub>O; y-NH<sub>3</sub>

**Protein references** (1): c.476C>T p.T159M|KNAMNVE|Missense|COSMIC|Large intestine(1) CANCER\_sp\_P62820,RAB1A\_HUMAN

Ras-related protein Rab-1A

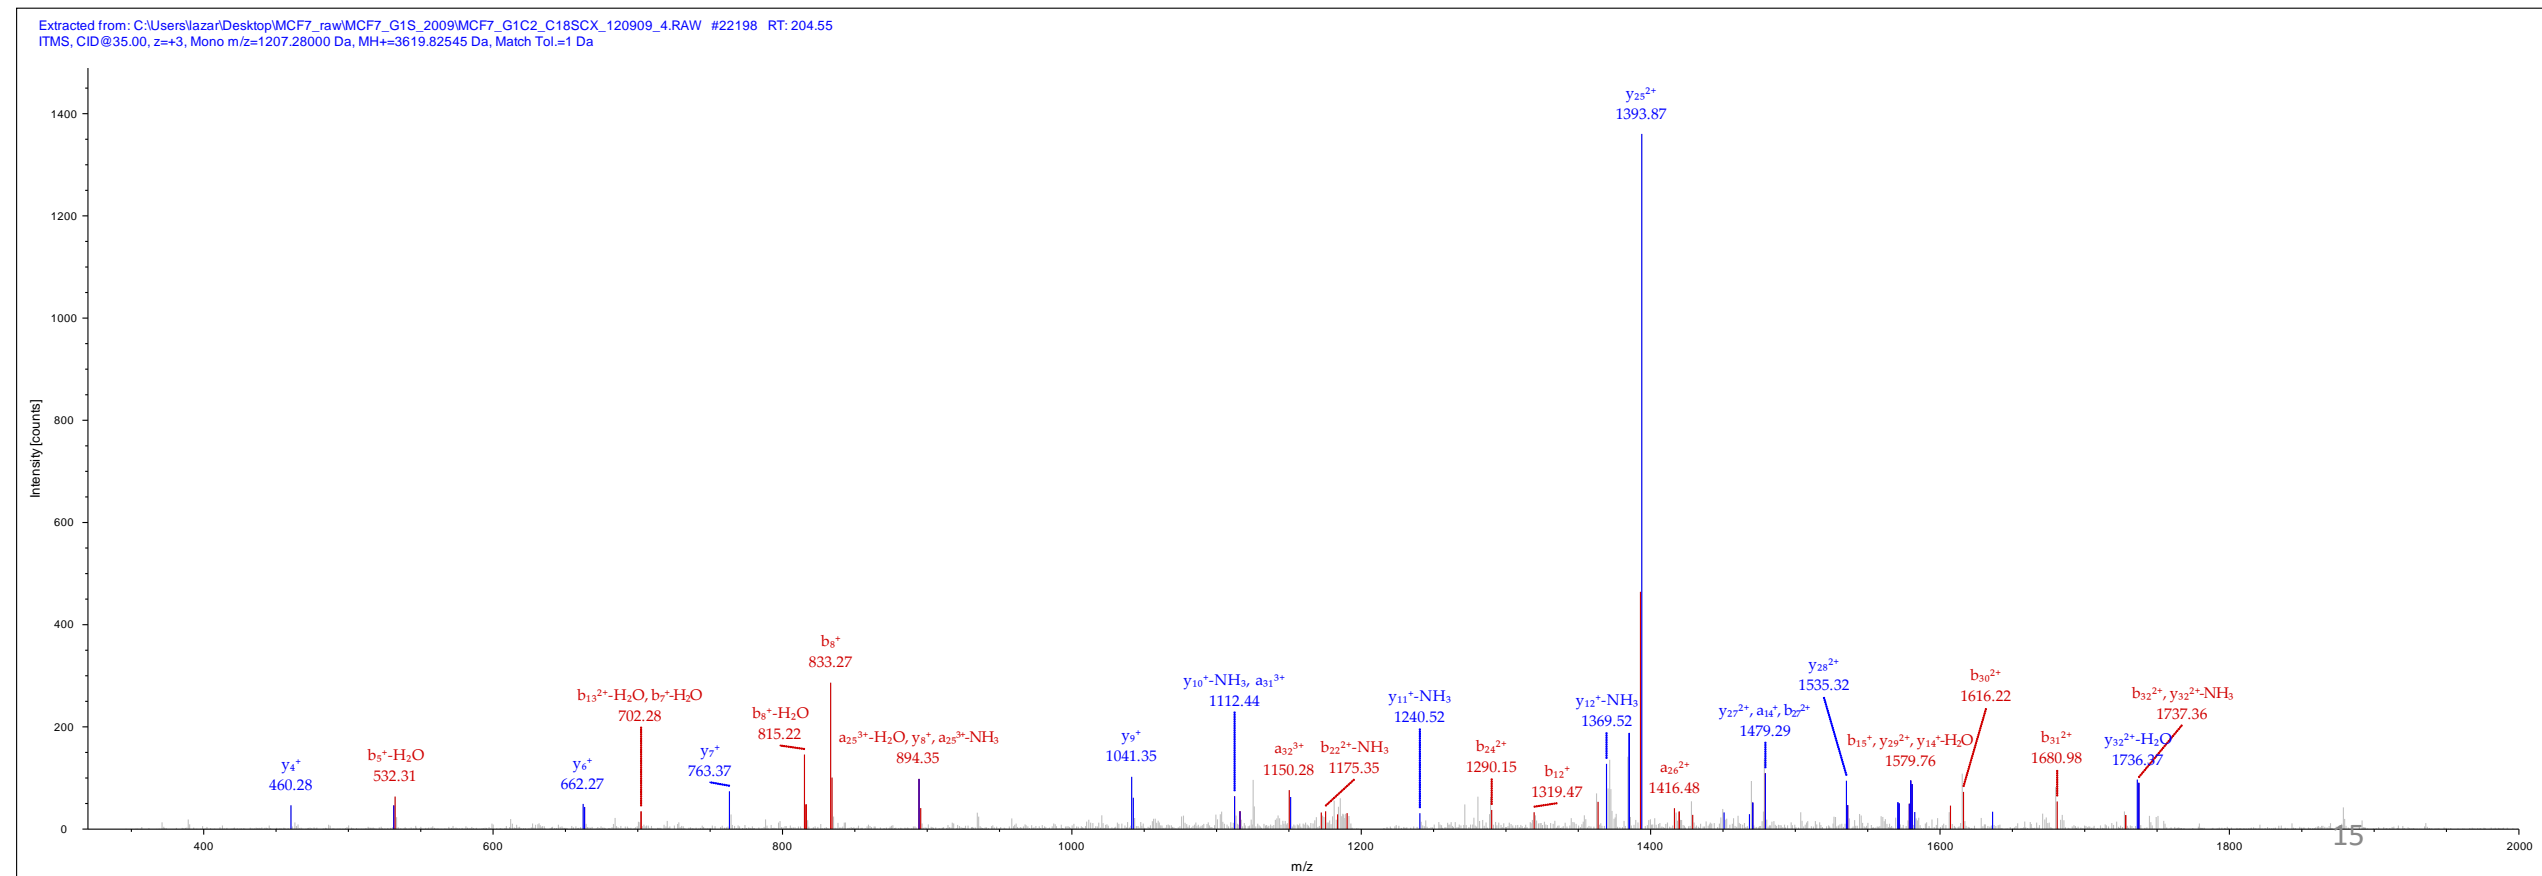

Sequence: EFDTLSGKVEESPDK, Charge: +2, Monoisotopic m/z: 842.64000 Da (+1739.22 mmu/+2064.01 ppm), MH+: 1684.27272 Da, RT: 85.24 min

Identified with: Sequest HT (v1.3); XCorr:3.47

Fragment match tolerance used for search: 1 Da

Fragments used for search: a; a-H<sub>2</sub>O; a-NH<sub>3</sub>; b; b-H<sub>2</sub>O; b-NH<sub>3</sub>; y; y-H<sub>2</sub>O; y-NH<sub>3</sub>

**Protein references** (1): c.2278T>G p.L760V|SGKVEES|Missense|COSMIC|Breast(1) CANCER\_sp\_Q9BXX2,AN30B\_HUMAN

Ankyrin repeat domain-containing protein 30B

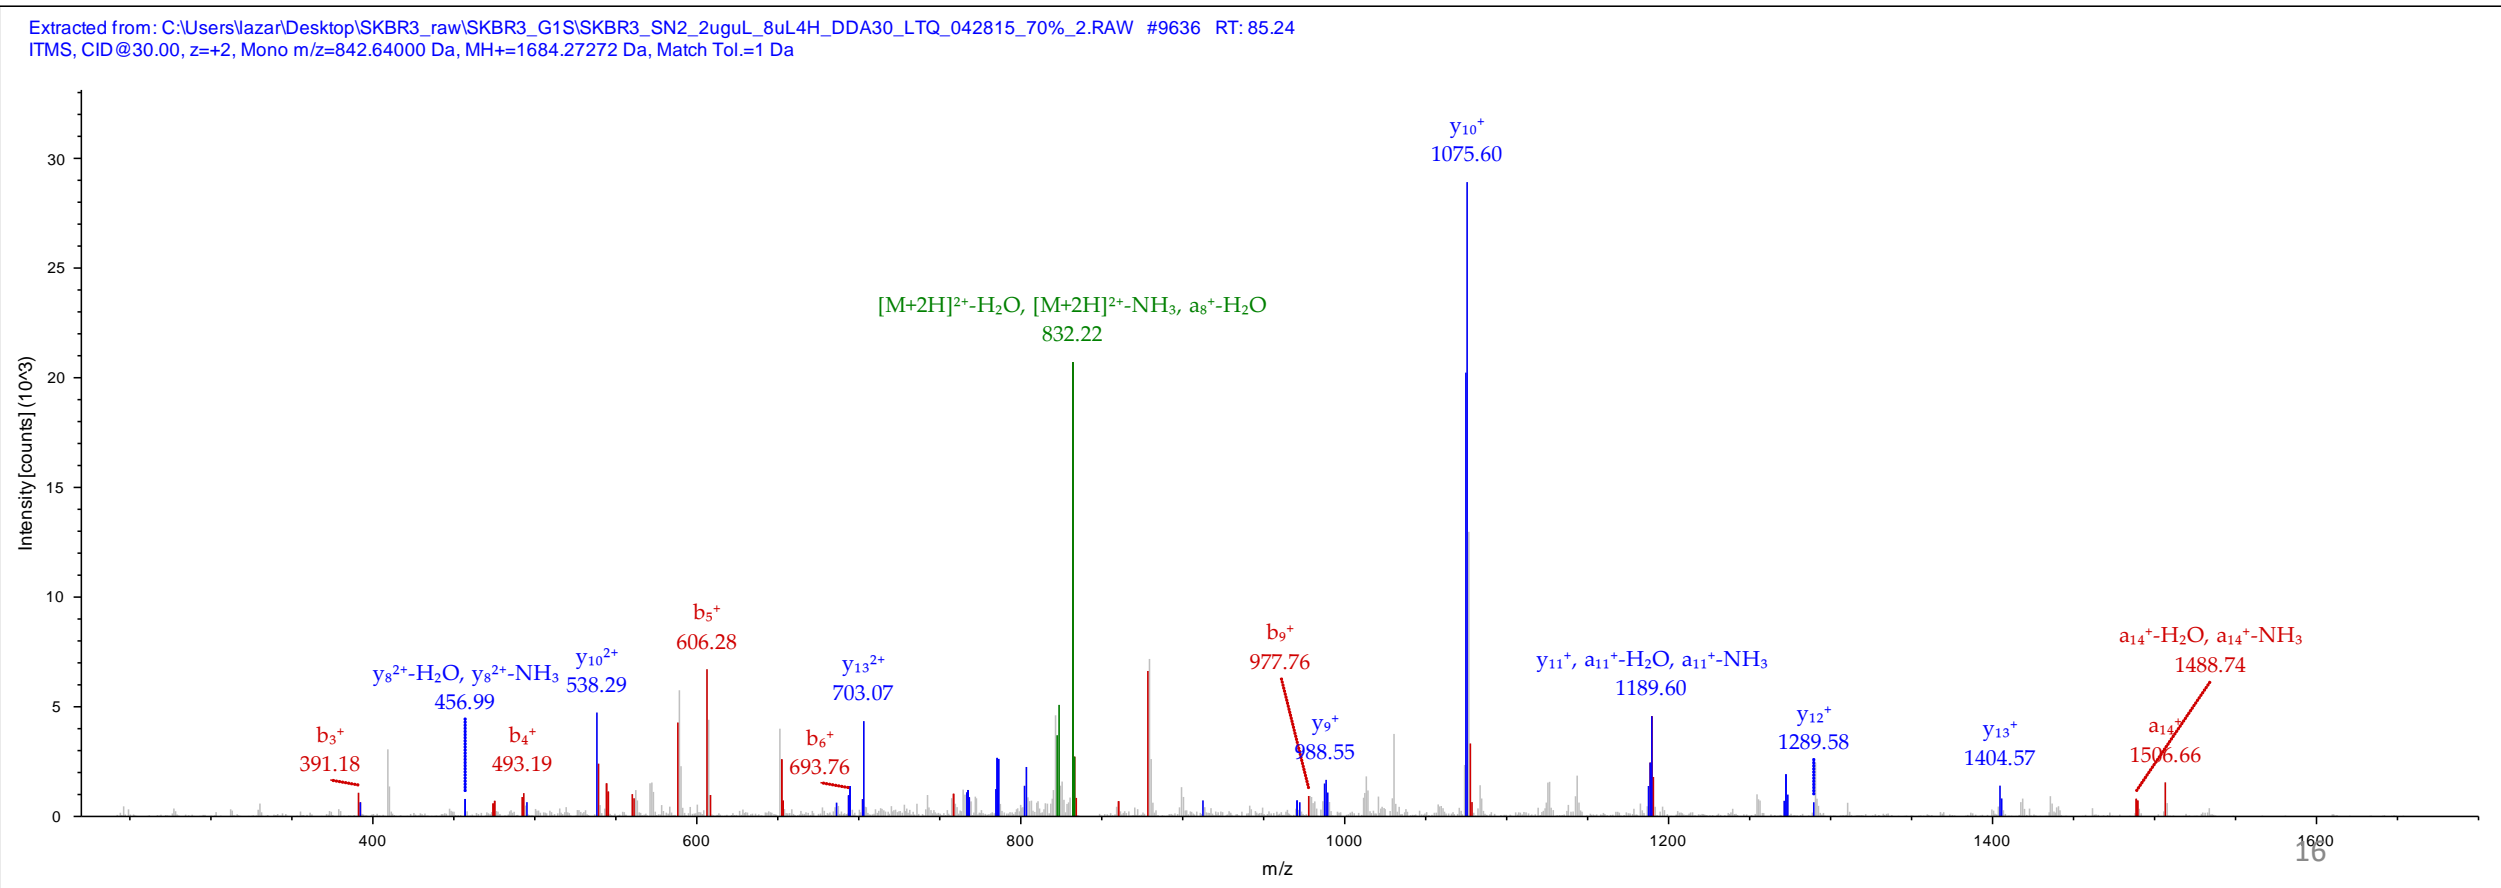



Sequence: EIYPYVIQERRPTLNELGISTPEELGLDKV, Charge: +3, Monoisotopic m/z: 1158.68000 Da (+729.86 mmu/+629.91 ppm), MH+: 3474.02545 Da, RT: 177.58 min

Identified with: Sequest HT (v1.3); XCorr:4.84

Fragment match tolerance used for search: 1 Da

Fragments used for search: a; a-H<sub>2</sub>O; a-NH<sub>3</sub>; b; b-H<sub>2</sub>O; b-NH<sub>3</sub>; y; y-H<sub>2</sub>O; y-NH<sub>3</sub>

**Protein references** (1): c.389T>G p.L130R|IQERRPT|Missense|COSMIC|Pancreas(1) CANCER\_sp\_P20674,COX5A\_HUMAN  
Cytochrome c oxidase subunit 5A, mitochondrial

Extracted from: C:\Users\lazar\Desktop\MCF7\_raw\MCF7\_G1S\_2009\MCF7\_SN1\_C18SCX\_120309\_3.RAW #21794 RT: 177.58  
ITMS, CID@35.00, z=+3, Mono m/z=1158.68000 Da, MH+=3474.02545 Da, Match Tol.=1 Da

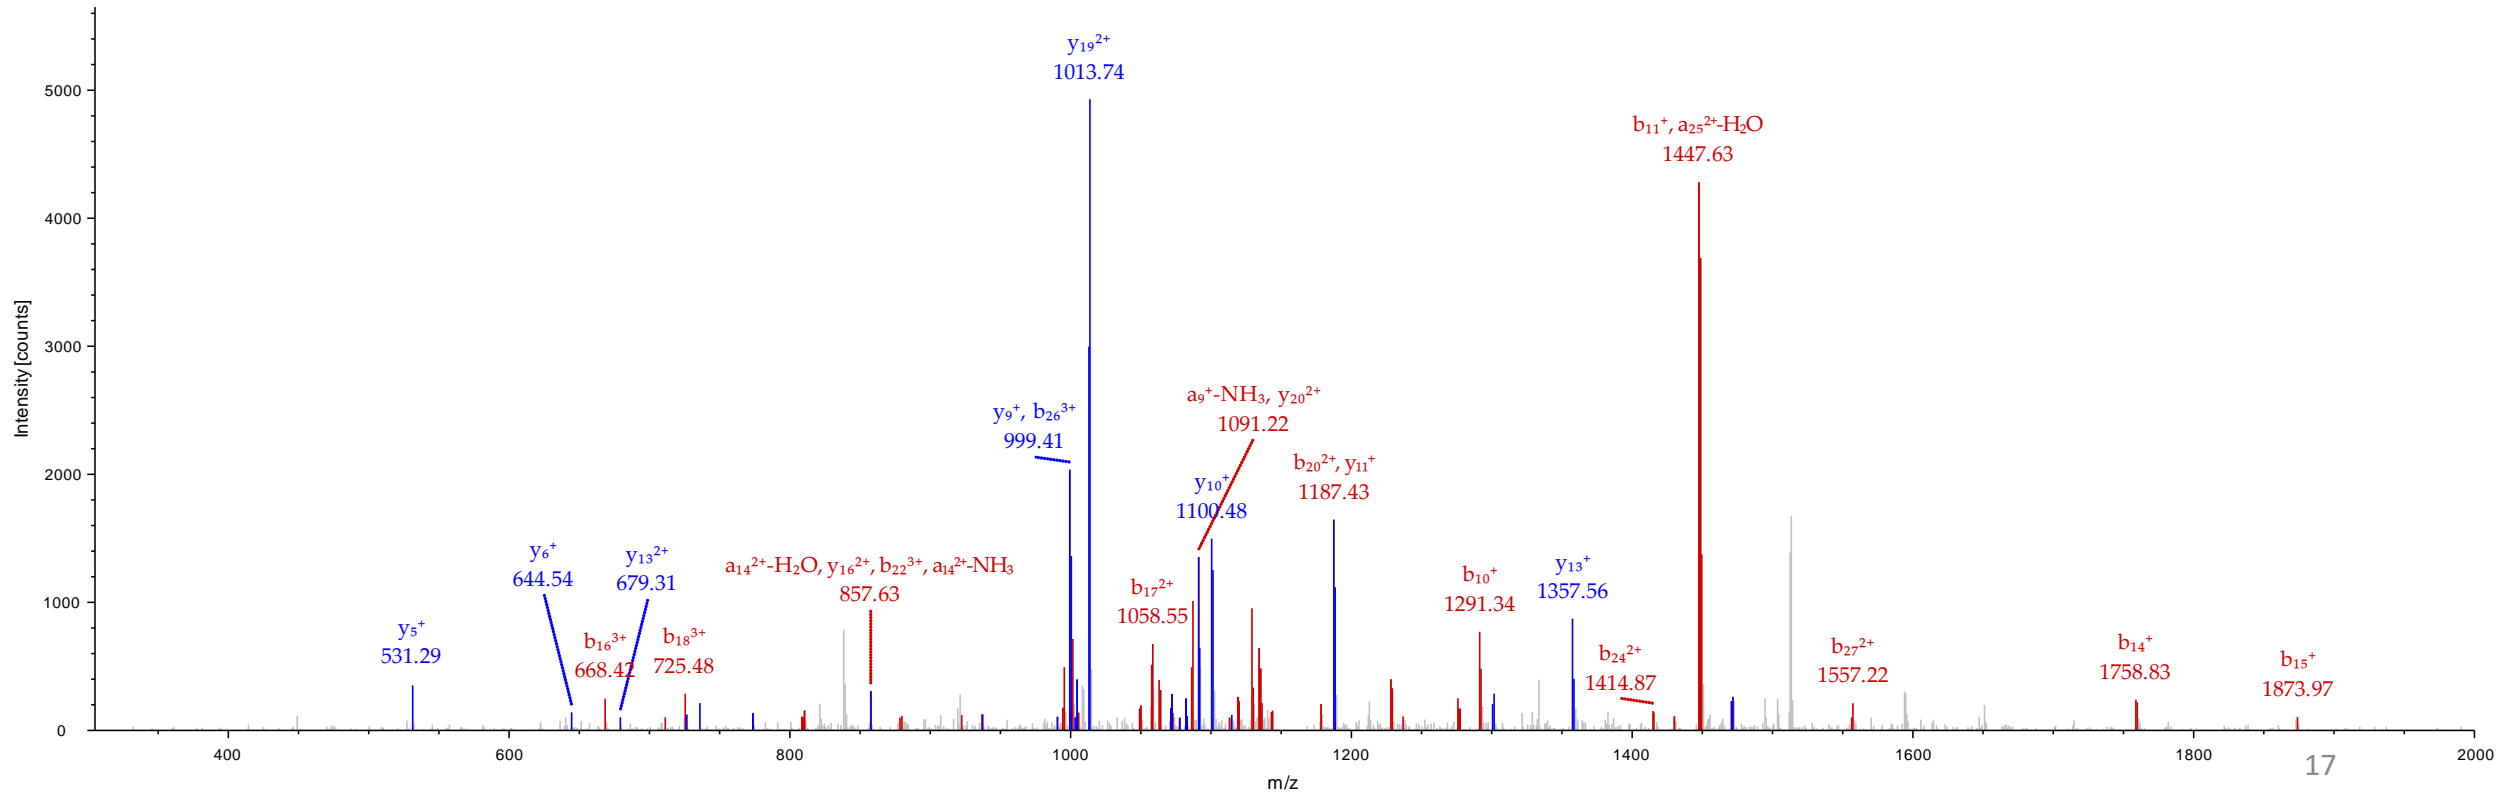

Sequence: EQLQQEQALLEEIER, Charge: +2, Monoisotopic m/z: 928.82000 Da (+346.71 mmu/+373.28 ppm), MH+: 1856.63272 Da, RT: 85.13 min

Identified with: Sequest HT (v1.3); XCorr:4.64

Fragment match tolerance used for search: 1 Da

Fragments used for search: a; a-H<sub>2</sub>O; a-NH<sub>3</sub>; b; b-H<sub>2</sub>O; b-NH<sub>3</sub>; y; y-H<sub>2</sub>O; y-NH<sub>3</sub>

**Protein references** (1): c.4157G>A p.R1386Q|EQLQQEQ|Missense|COSMIC|Breast(1) OR sp|Q15149-2,PLEC\_HUMAN Isoform 2 of Plectin|c.3827G>A|p.R1276Q|EQLQQEQ|Missense|COSMIC|Breast(1) OR sp|Q15149-4,PLEC\_HUMAN Isoform 4 of Plectin|c.3746G>A|p.R1249Q|EQLQQEQ|Missense|COSMIC|Breast(1) CANCER\_sp\_Q15149,PLEC\_HUMAN Plectin

Extracted from: C:\Users\lazar\Desktop\MCF7\_raw\MCF7\_G1S\_2009\MCF7\_SN1\_C18SCX\_120209\_2.RAW #9779 RT: 85.13  
ITMS, CID@35.00, z=+2, Mono m/z=928.82000 Da, MH+=1856.63272 Da, Match Tol.=1 Da

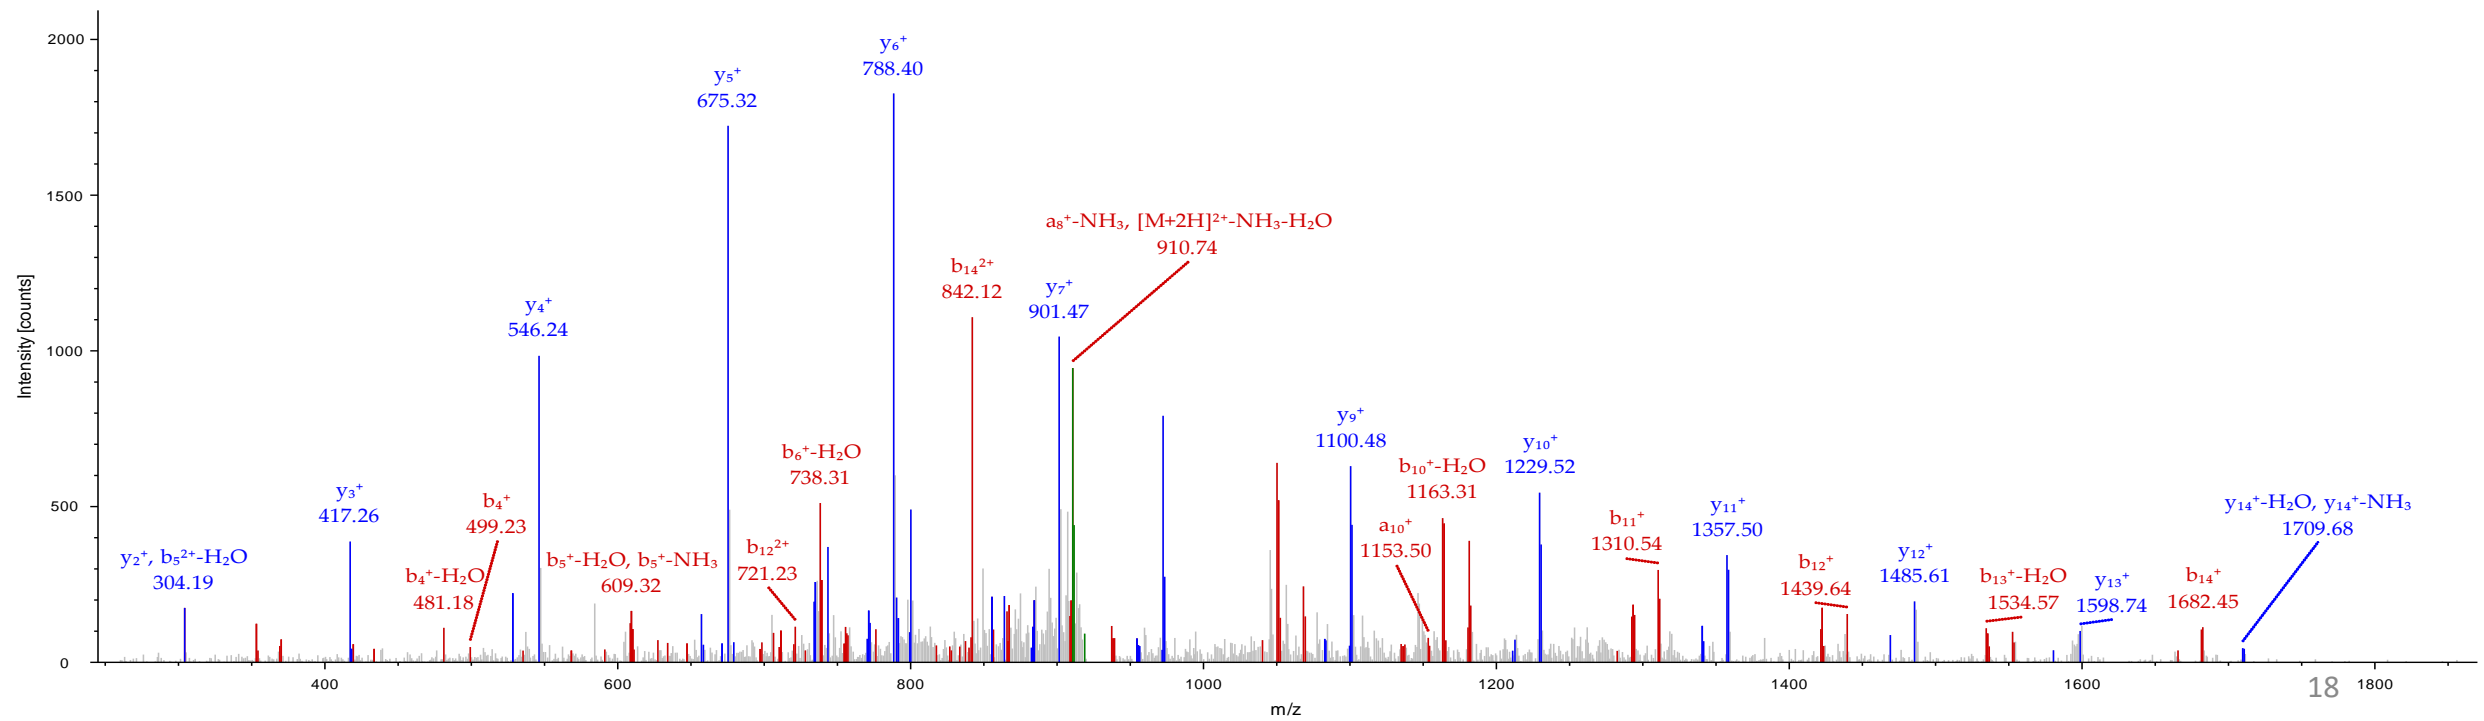

Sequence: FGLAHLMALGLGPWMAVEIPDLIQK, Charge: +3, Monoisotopic m/z: 907.32000 Da (-173.92 mmu/-191.68 ppm), MH+: 2719.94545 Da, RT: 179.00 min

Identified with: Sequest HT (v1.3); XCorr:4.26

Fragment match tolerance used for search: 1 Da

Fragments used for search: a; a-H<sub>2</sub>O; a-NH<sub>3</sub>; b; b-H<sub>2</sub>O; b-NH<sub>3</sub>; y; y-H<sub>2</sub>O; y-NH<sub>3</sub>

**Protein references** (1): c.436C>A p.L146M|GPWMAVE|Missense|COSMIC|Autonomic ganglia(1)

CANCER\_sp\_Q9Y3C8,UFC1\_HUMAN Ubiquitin-fold modifier-conjugating enzyme 1

Extracted from: C:\Users\lazar\Desktop\MCF10\_raw\MCF10\_Raw\_2011\MCF10\_SC2\_C18SCX\_101411\_4.RAW #20812 RT: 179.00  
ITMS, CID@35.00, z=+3, Mono m/z=907.32000 Da, MH+=2719.94545 Da, Match Tol.=1 Da

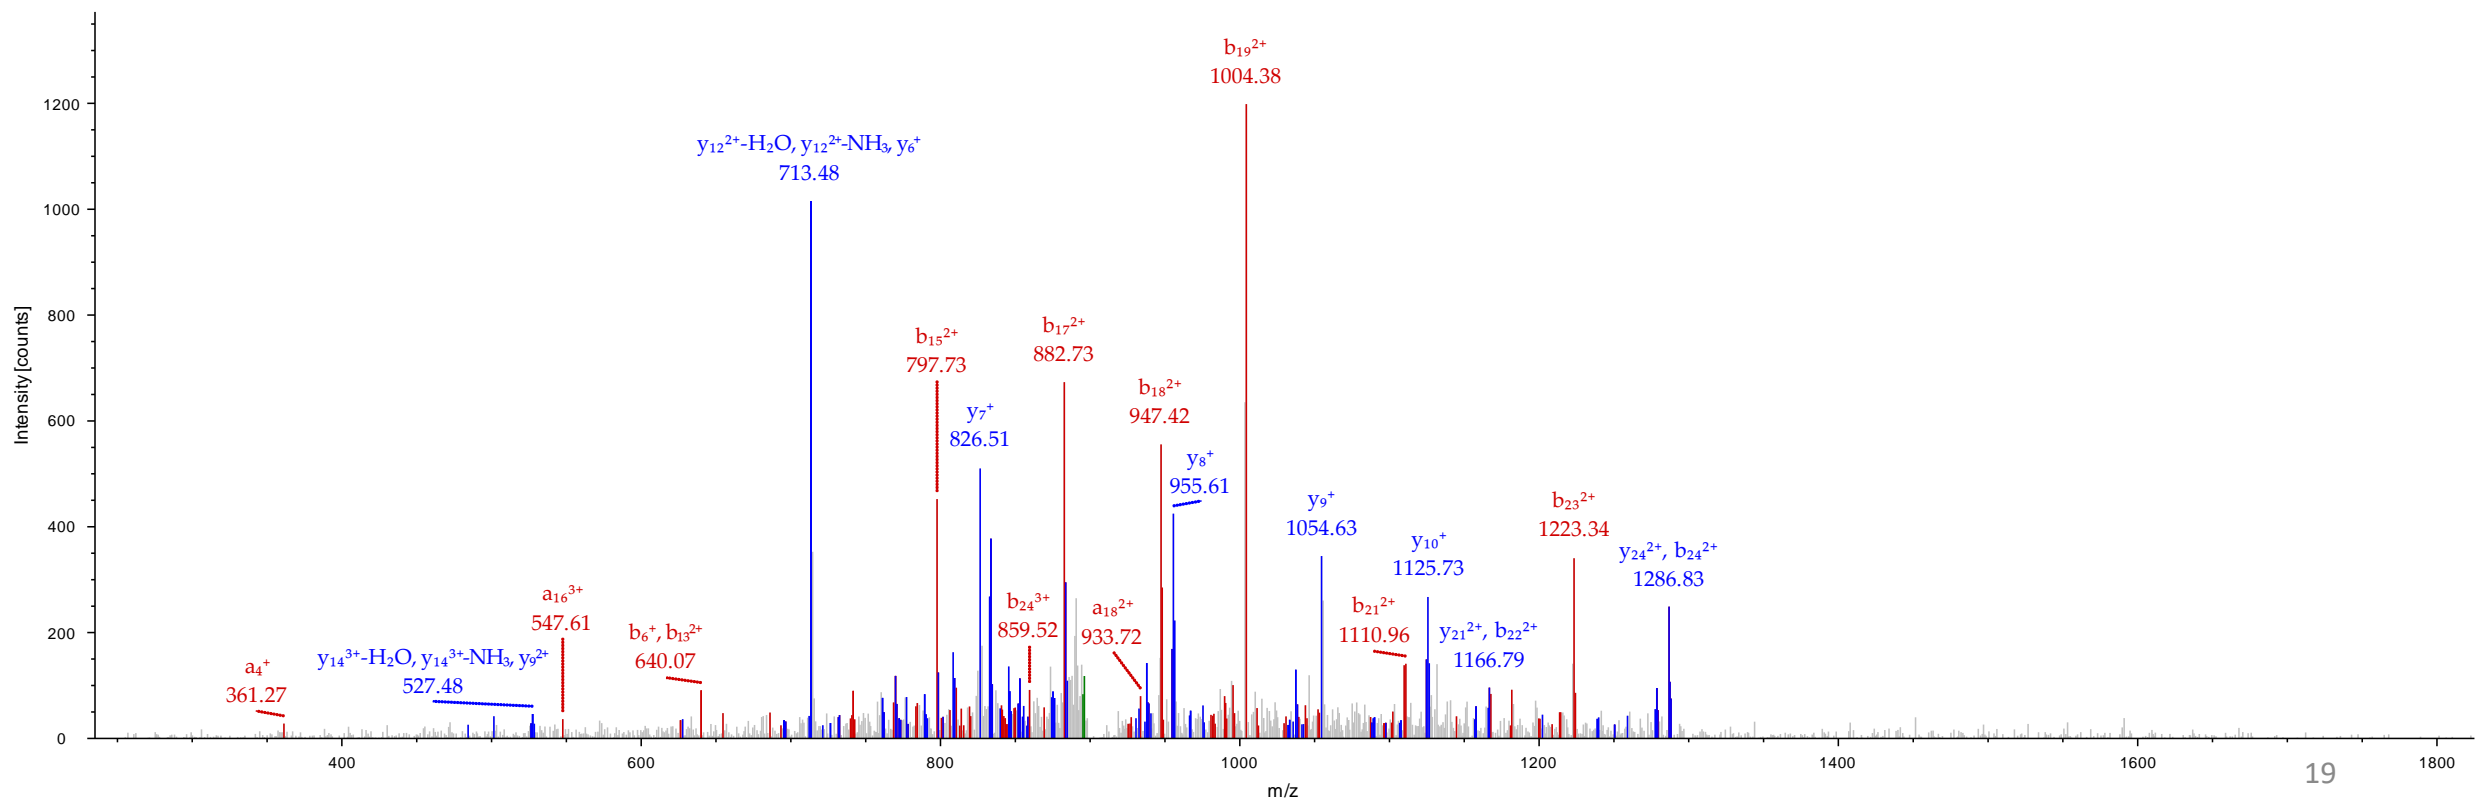

Sequence: FQSSAVMALQEGCEAYLVGLFEDTNLCAIHAK, Charge: +3, Monoisotopic m/z: 1153.30000 Da (-252.69 mmu/-219.1 ppm), MH+: 3457.88545 Da, RT: 199.23 min

Identified with: Sequest HT (v1.3); XCorr:4.71

Fragment match tolerance used for search: 1 Da

Fragments used for search: a; a-H<sub>2</sub>O; a-NH<sub>3</sub>; b; b-H<sub>2</sub>O; b-NH<sub>3</sub>; y; y-H<sub>2</sub>O; y-NH<sub>3</sub>

**Protein references (1):** c.287C>G p.A96G | LQEGCEA | Missense | COSMIC | Endometrium(1) CANCER\_sp\_P68431,H31\_HUMAN Histone H3.1

Extracted from: C:\Users\lazar\Desktop\SKBR3\_raw\SKBR3\_G1S\SKBR3\_SN3\_2uguL\_8uL4H\_DDA30\_LTQ\_050315\_70%\_6.RAW #22702 RT: 199.23 ITMS, CID@30.00, z=+3, Mono m/z=1153.30000 Da, MH+=3457.88545 Da, Match Tol.=1 Da

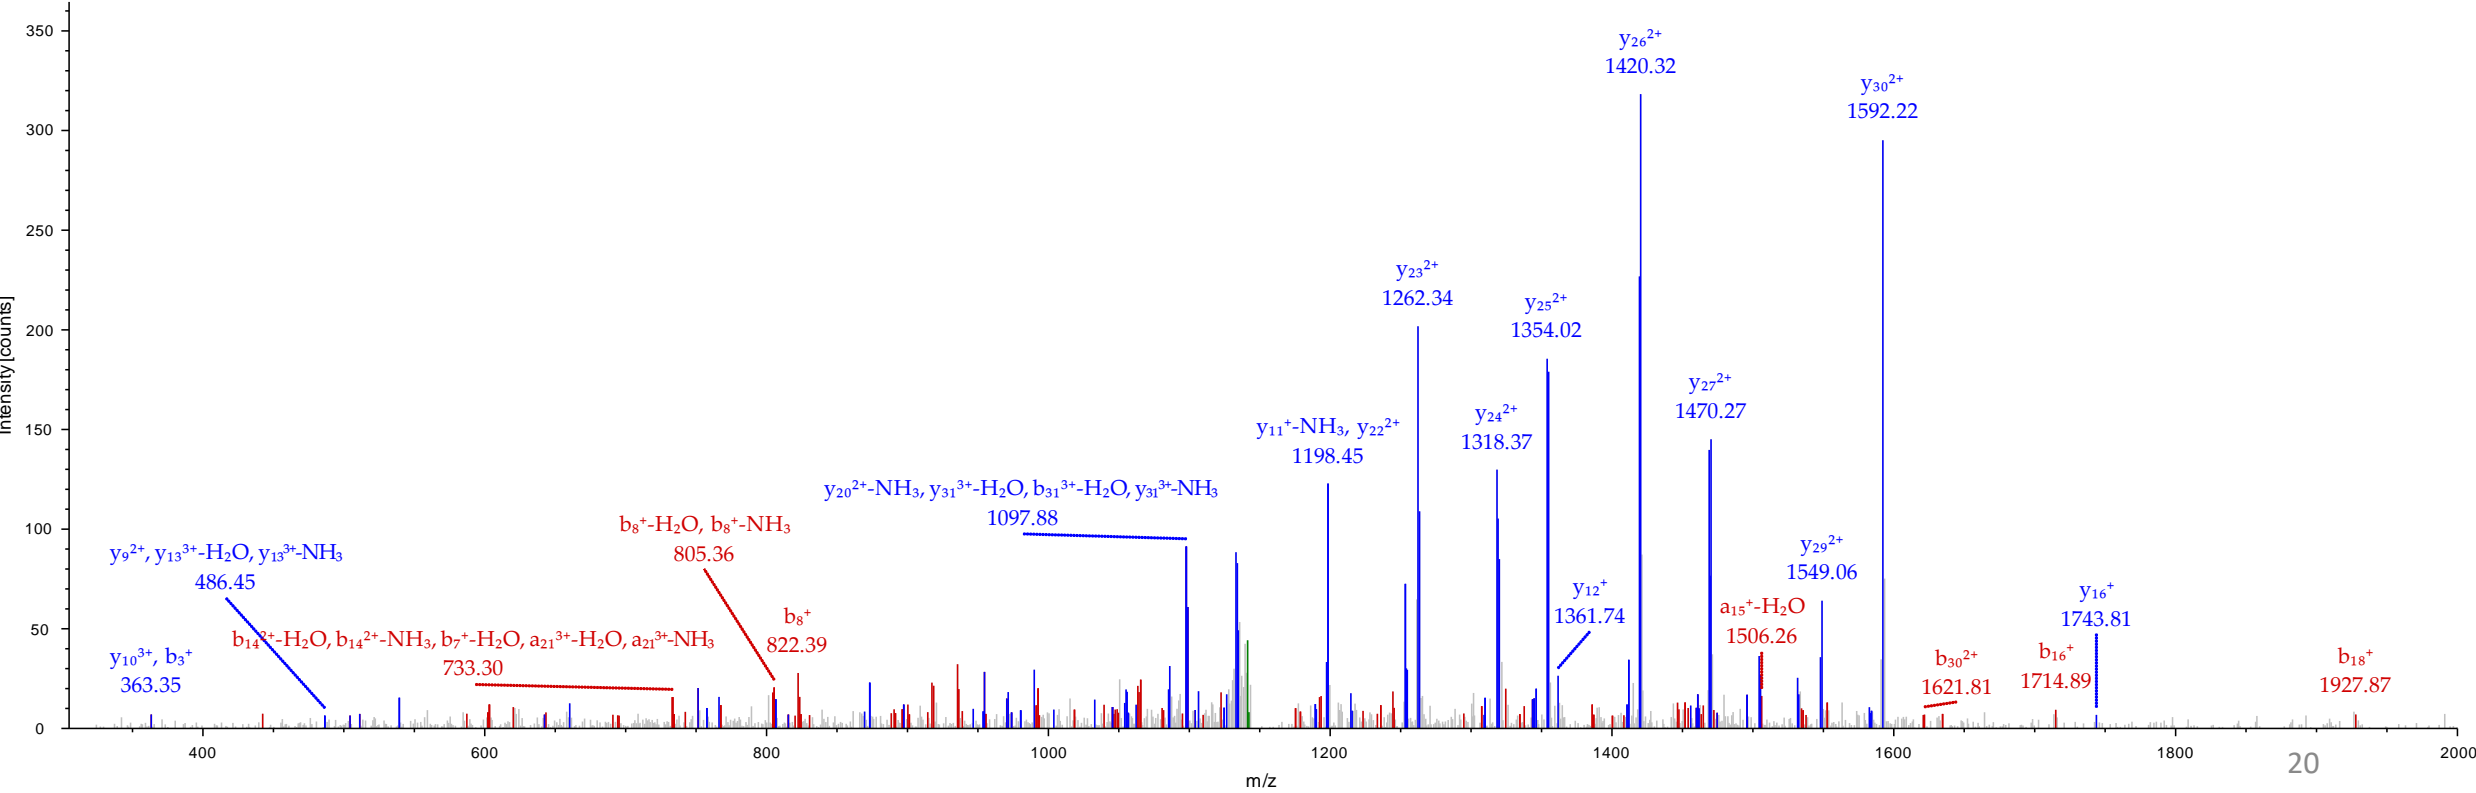

Sequence: FTLDCTHPVEDGIMDAANYEQFLQER, Charge: +3, Monoisotopic m/z: 1015.64000 Da (+848.73 mmu/+835.66 ppm), MH+: 3044.90545 Da, RT: 141.04 min

Identified with: Sequest HT (v1.3); XCorr:4.43

Fragment match tolerance used for search: 1 Da

Fragments used for search: a; a-H<sub>2</sub>O; a-NH<sub>3</sub>; b; b-H<sub>2</sub>O; b-NH<sub>3</sub>; y; y-H<sub>2</sub>O; y-NH<sub>3</sub>

**Protein references** (1): c.116T>A p.F39Y|AANYEQF| Missense|COSMIC|Endometrium(1) CANCER\_sp\_P35268,RL22\_HUMAN 60S ribosomal protein L22

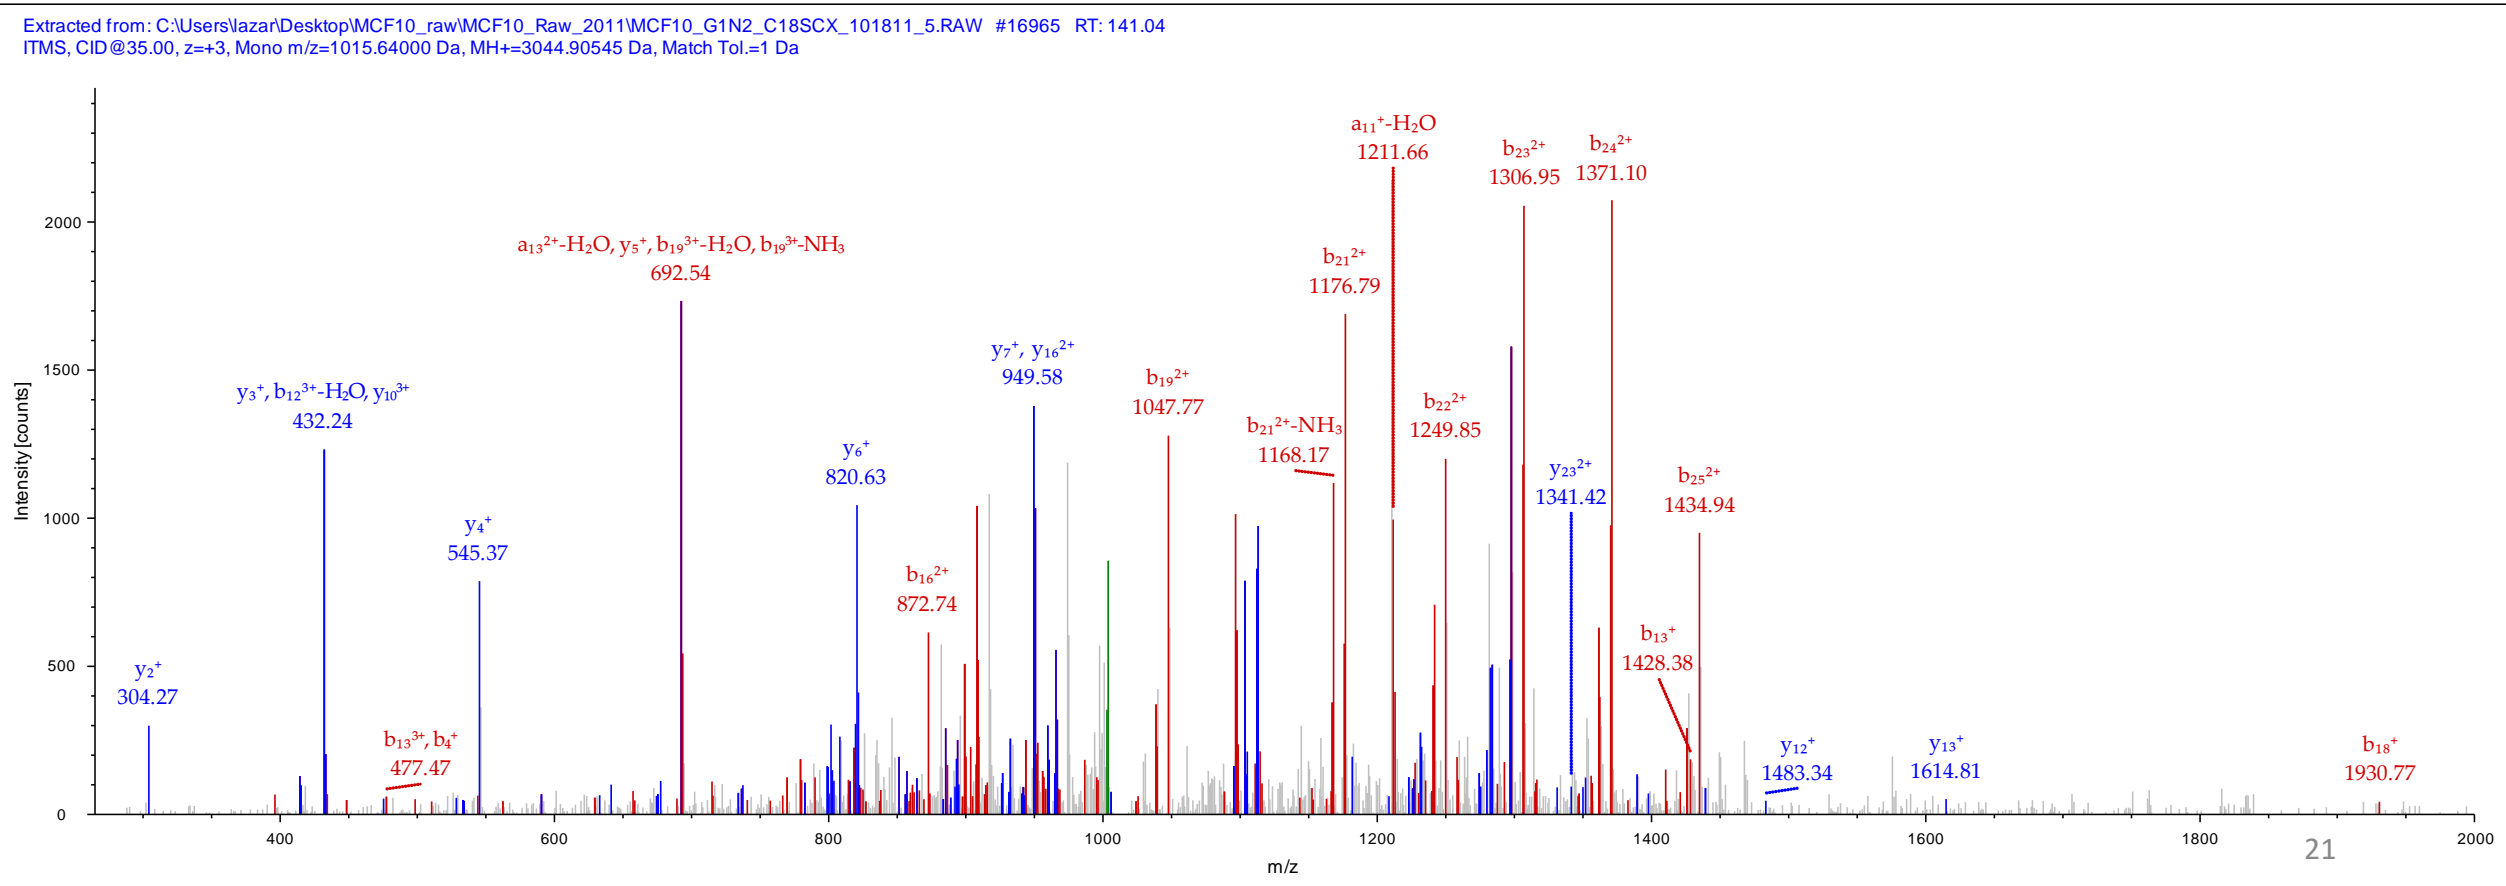

Sequence: GCIEKLSEDVEQLKK, Charge: +2, Monoisotopic m/z: 860.72000 Da (+767.11 mmu/+891.24 ppm), MH+: 1720.43272 Da, RT: 120.55 min

Identified with: Sequest HT (v1.3); XCorr:3.72

Fragment match tolerance used for search: 1 Da

Fragments used for search: a; a-H<sub>2</sub>O; a-NH<sub>3</sub>; b; b-H<sub>2</sub>O; b-NH<sub>3</sub>; y; y-H<sub>2</sub>O; y-NH<sub>3</sub>

**Protein references** (1): c.157G>T p.V53L|VEQLKKQ|Missense|COSMIC|Lung(1) CANCER\_sp\_P61266,STX1B\_HUMAN Syntaxin-1B

Extracted from: C:\Users\lazar\Desktop\MCF7\_raw\MCF7\_G1S\_2009\MCF7\_SC2\_C18SCX\_121409\_5.RAW #13018 RT: 120.55  
ITMS, CID@35.00, z=+2, Mono m/z=860.72000 Da, MH+=1720.43272 Da, Match Tol.=1 Da

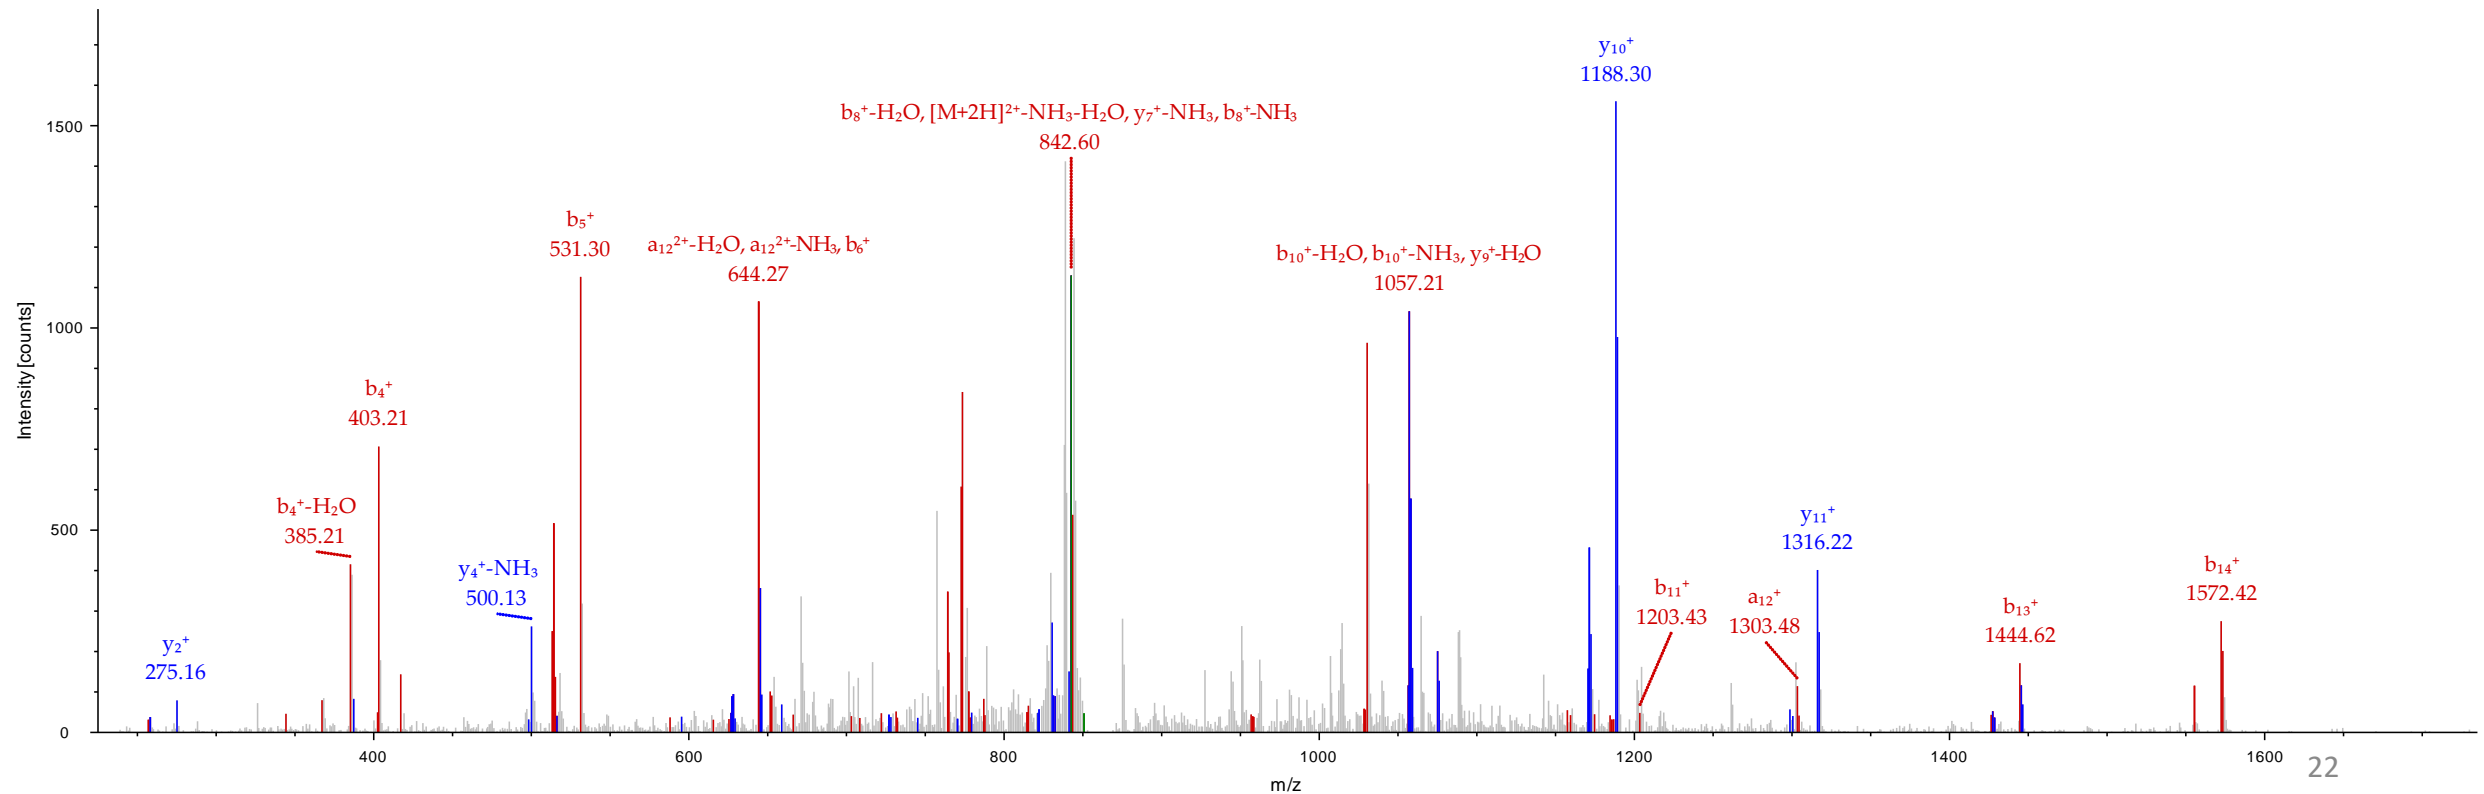

Sequence: GFDFVTFESPADAK, Charge: +2, Monoisotopic m/z: 766.2200 Da (+361.01 mmu/+471.15 ppm), MH+: 1531.43272 Da, RT: 91.71 min

Identified with: Sequest HT (v1.3); XCorr:4.05

Fragment match tolerance used for search: 1 Da

Fragments used for search: a; a-H<sub>2</sub>O; b; b-H<sub>2</sub>O; y; y-H<sub>2</sub>O; y-NH<sub>3</sub>

**Protein references** (1): c.155C>A p.A52D|RGFDFVT|Missense|COSMIC|Endometrium(1) OR sp|P38159,RBMX\_HUMAN RNA-binding motif protein, X chromosome|c.155C>A|p.A52D|RGFDFVT|Missense|COSMIC|Endometrium(1) CANCER\_sp\_P38159-3,RBMX\_HUMAN Isoform 3 of RNA-binding motif protein, X chromosome

Extracted from: C:\Users\lazar\Desktop\MCF10\_raw\MCF10\_Raw\_2011\MCF10\_G1N3\_C18SCX\_102311\_1.RAW #11423 RT: 91.71  
ITMS, CID@35.00, z=+2, Mono m/z=766.2200 Da, MH+=1531.43272 Da, Match Tol.=1 Da

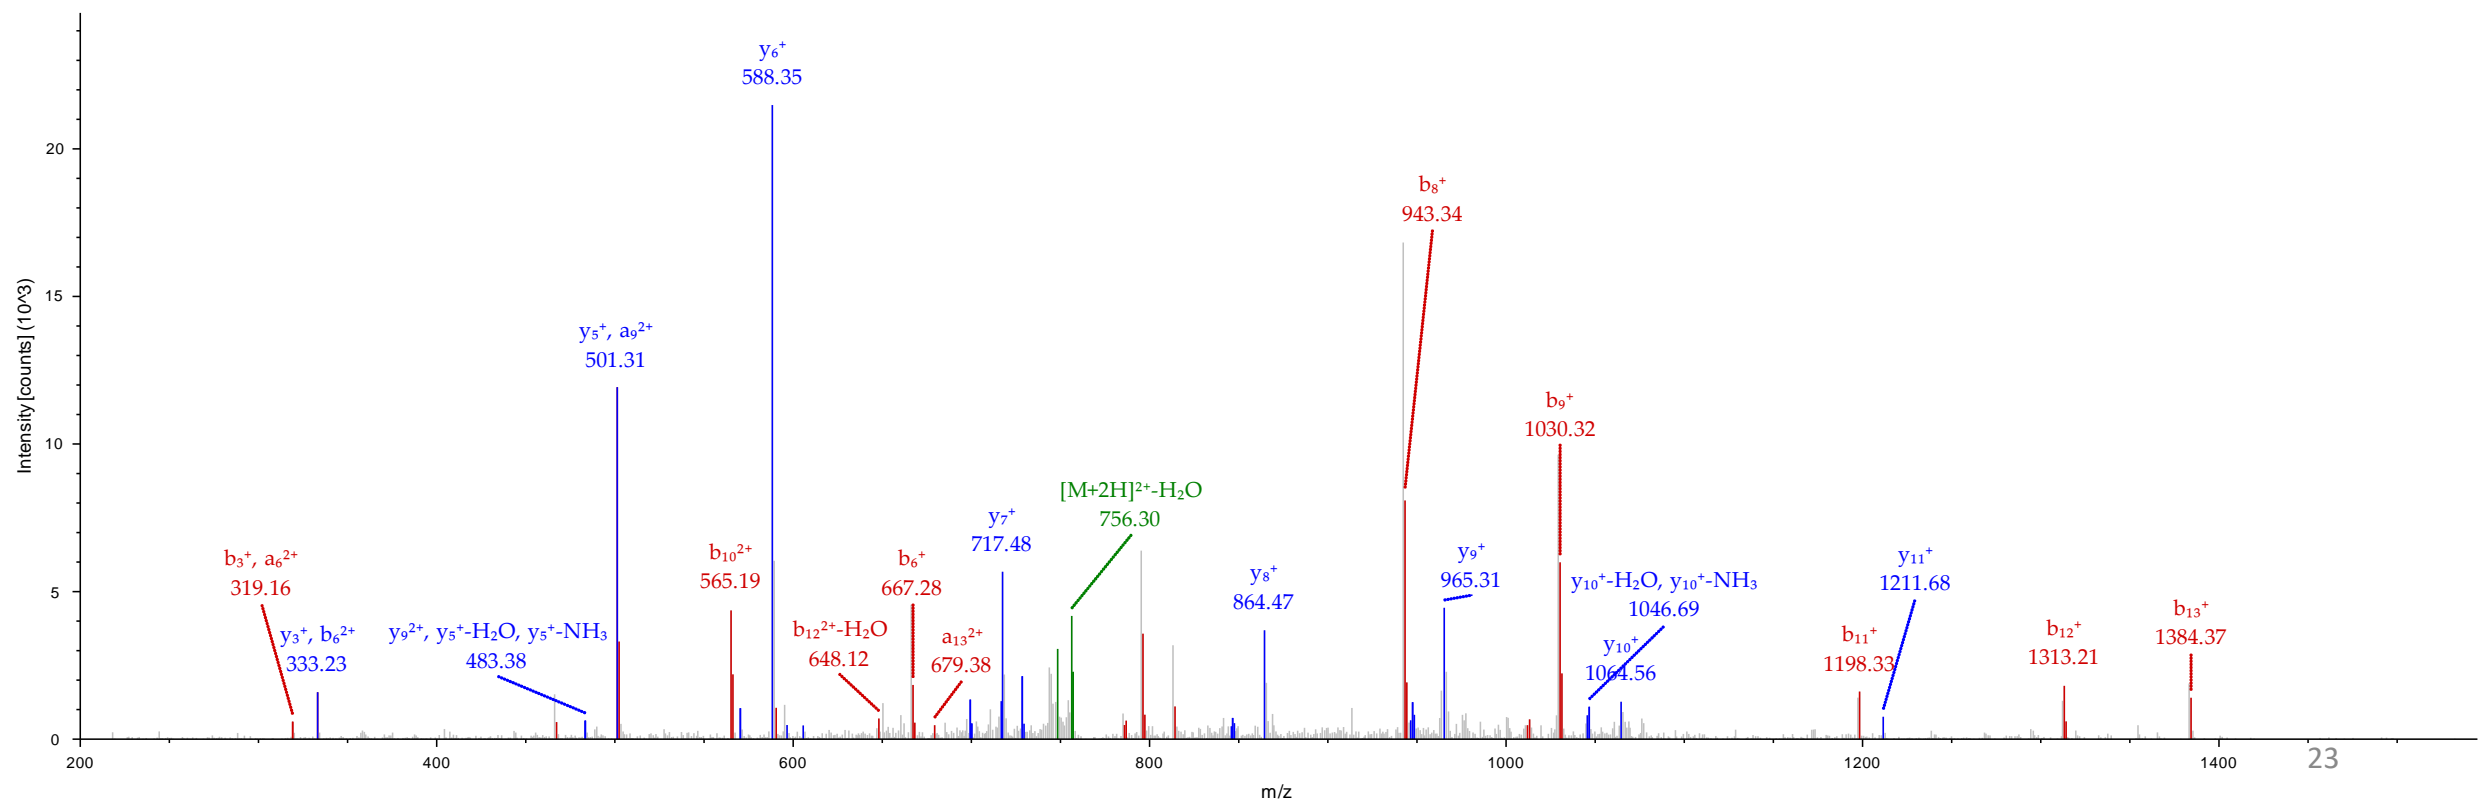

Sequence: GFGFITFTNPEHASDAMR, Charge: +2, Monoisotopic m/z: 999.76000 Da (+297.75 mmu/+297.82 ppm), MH+: 1998.51272 Da, RT: 87.51 min

Identified with: Sequest HT (v1.3); XCorr:4.55

Fragment match tolerance used for search: 1 Da

Fragments used for search: a; a-H<sub>2</sub>O; a-NH<sub>3</sub>; b; b-H<sub>2</sub>O; b-NH<sub>3</sub>; y; y-H<sub>2</sub>O; y-NH<sub>3</sub>

**Protein references** (1): c.185T>A p.V62D|HASDAMR|Missense|COSMIC|Breast(1) CANCER\_sp\_P98179,RBM3\_HUMAN Putative RNA-binding protein 3

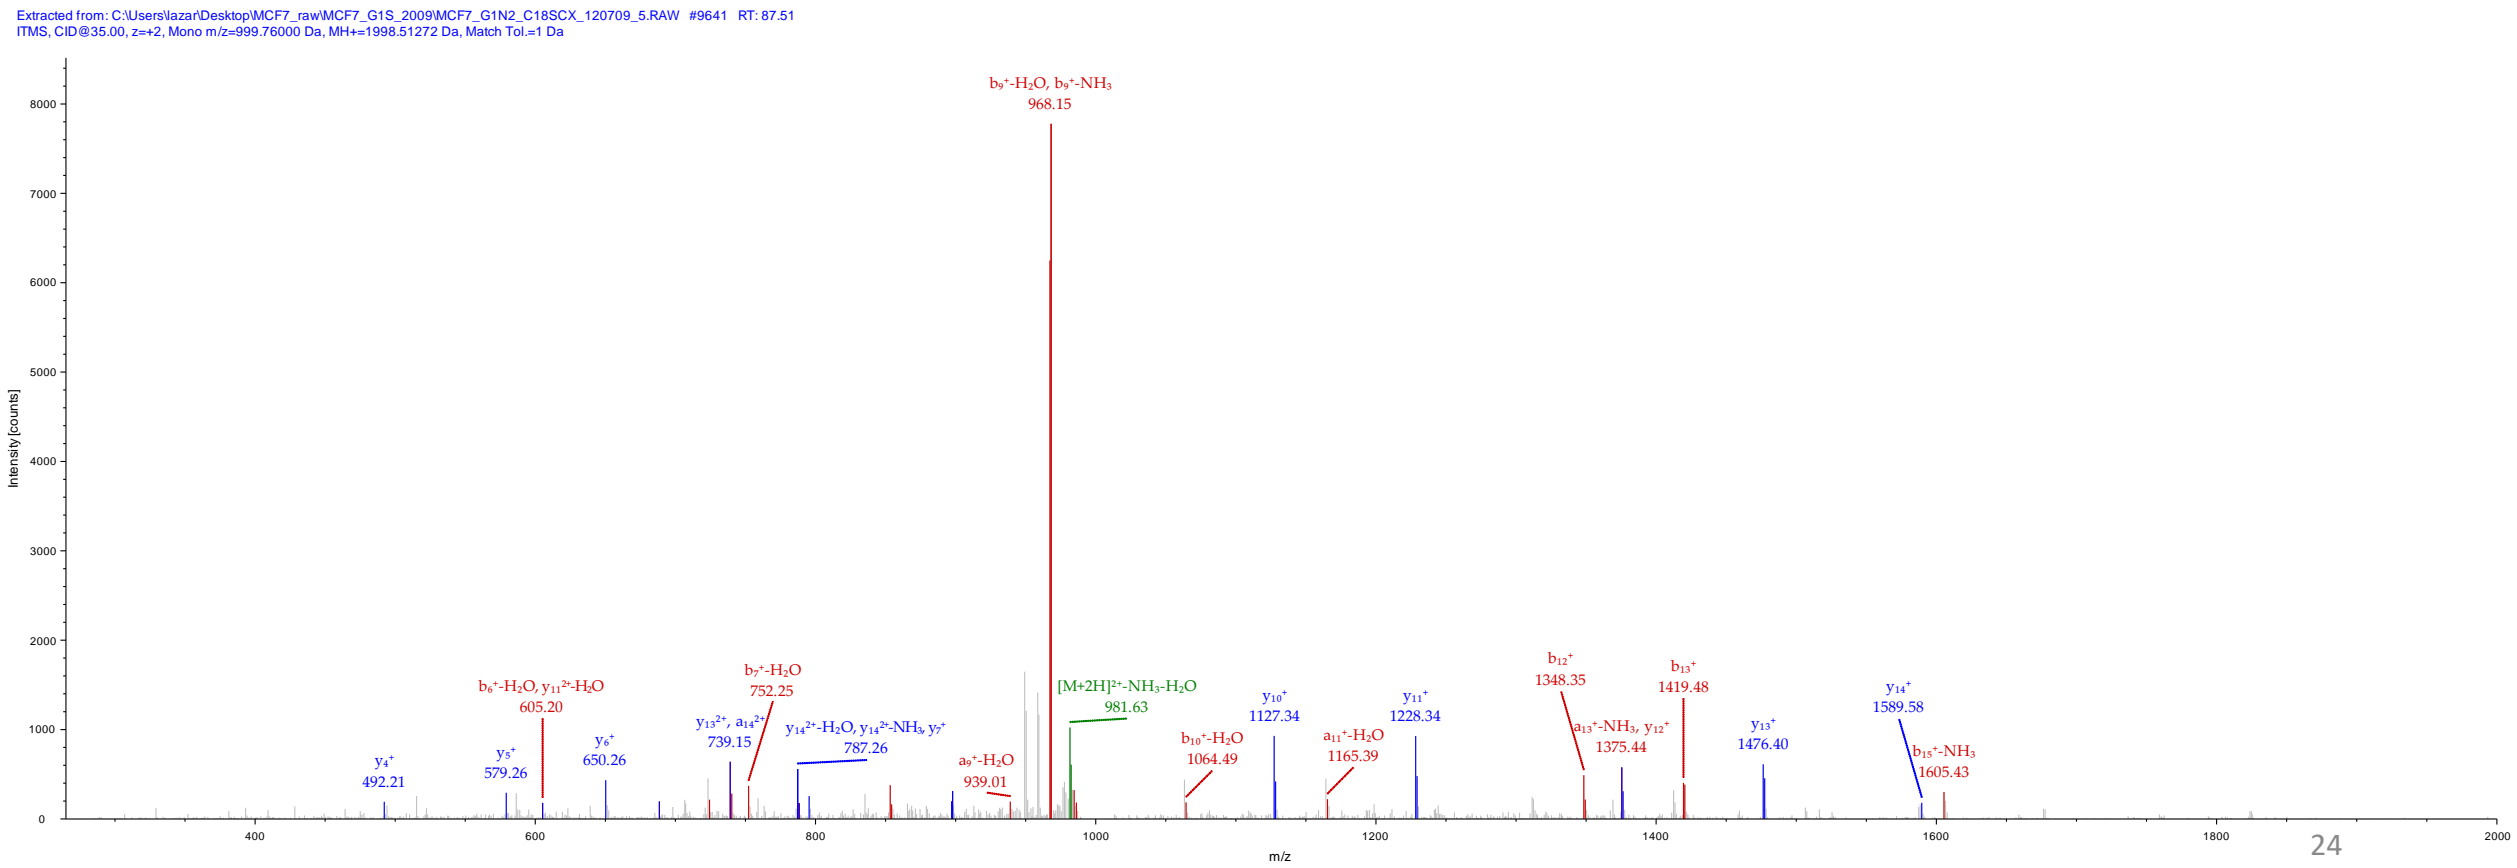



Sequence: GMLDLLEVHLLDFPNIVIK, Charge: +2, Monoisotopic m/z: 1090.40000 Da (+286.67 mmu/+262.91 ppm), MH+: 2179.79272 Da, RT: 138.29 min

Identified with: Sequest HT (v1.3); XCorr:3.89

Fragment match tolerance used for search: 1 Da

Fragments used for search: a; a-H<sub>2</sub>O; a-NH<sub>3</sub>; b; b-H<sub>2</sub>O; b-NH<sub>3</sub>; y; y-H<sub>2</sub>O; y-NH<sub>3</sub>

**Protein references** (1): c.5612C>T p.P1871L|MLDLLEV|Missense|COSMIC|Kidney(1) CANCER\_sp\_Q6P2Q9,PRP8\_HUMAN Pre-mRNA-processing-splicing factor 8

Extracted from: C:\Users\lazar\Desktop\MCF7\_raw\MCF7\_G1S\_2009\MCF7\_SN1\_C18SCX\_120309\_4.RAW #16569 RT: 138.29  
ITMS, CID@35.00, z=+2, Mono m/z=1090.40000 Da, MH+=2179.79272 Da, Match Tol.=1 Da

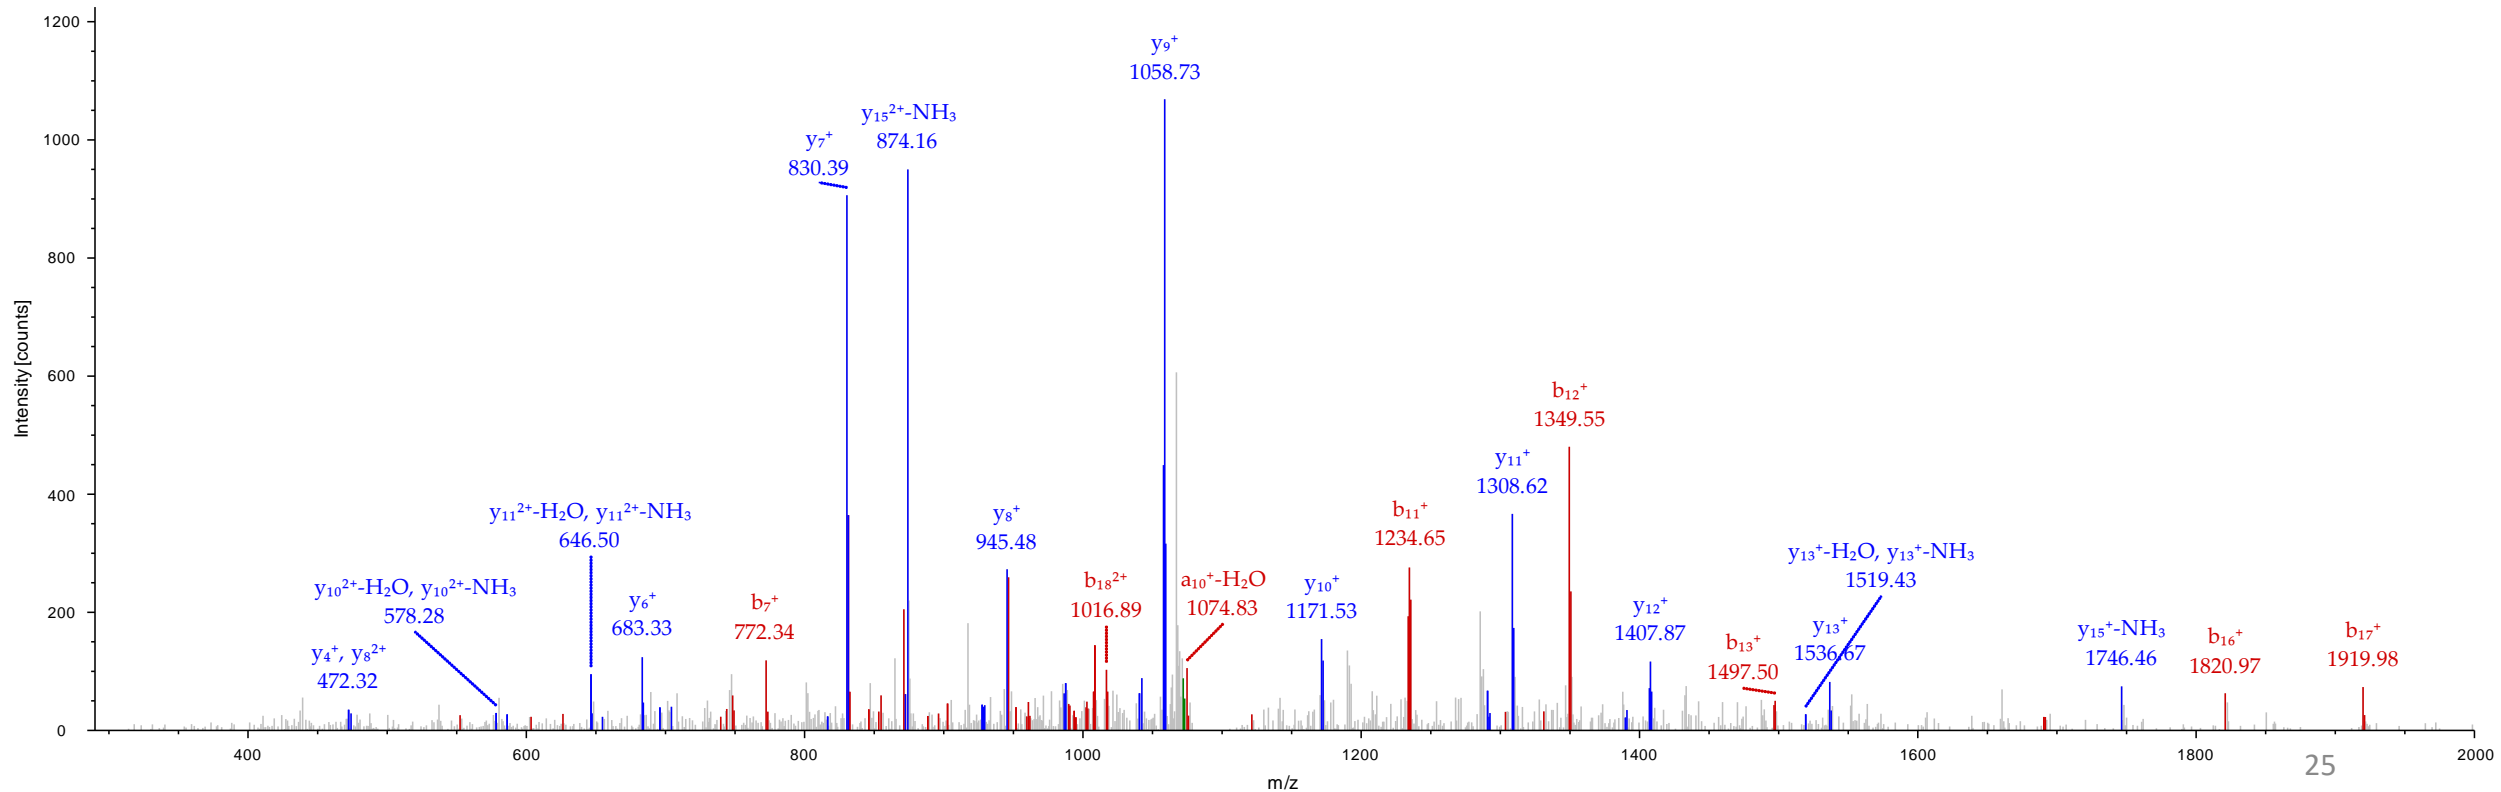

Sequence: GTAAAAAATAAAAK, Charge: +2, Monoisotopic m/z: 614.63226 Da (-203.8 mmu/-331.58 ppm), MH+: 1228.25725 Da, RT: 30.71 min

Identified with: Sequest HT (v1.3); XCorr:5.23

Fragment match tolerance used for search: 1 Da

Fragments used for search: a; a-H<sub>2</sub>O; b; b-H<sub>2</sub>O; y; y-H<sub>2</sub>O; y-NH<sub>3</sub>

**Protein references** (1): p.A159\_K160insAAA|AAAAAAKVP|Insertion - in frame|COSMIC|Endometrium(1) - [c.445\_446insCTGCTGCTG] CANCER\_sp\_P50914,RL14\_HUMAN 60S ribosomal protein L14

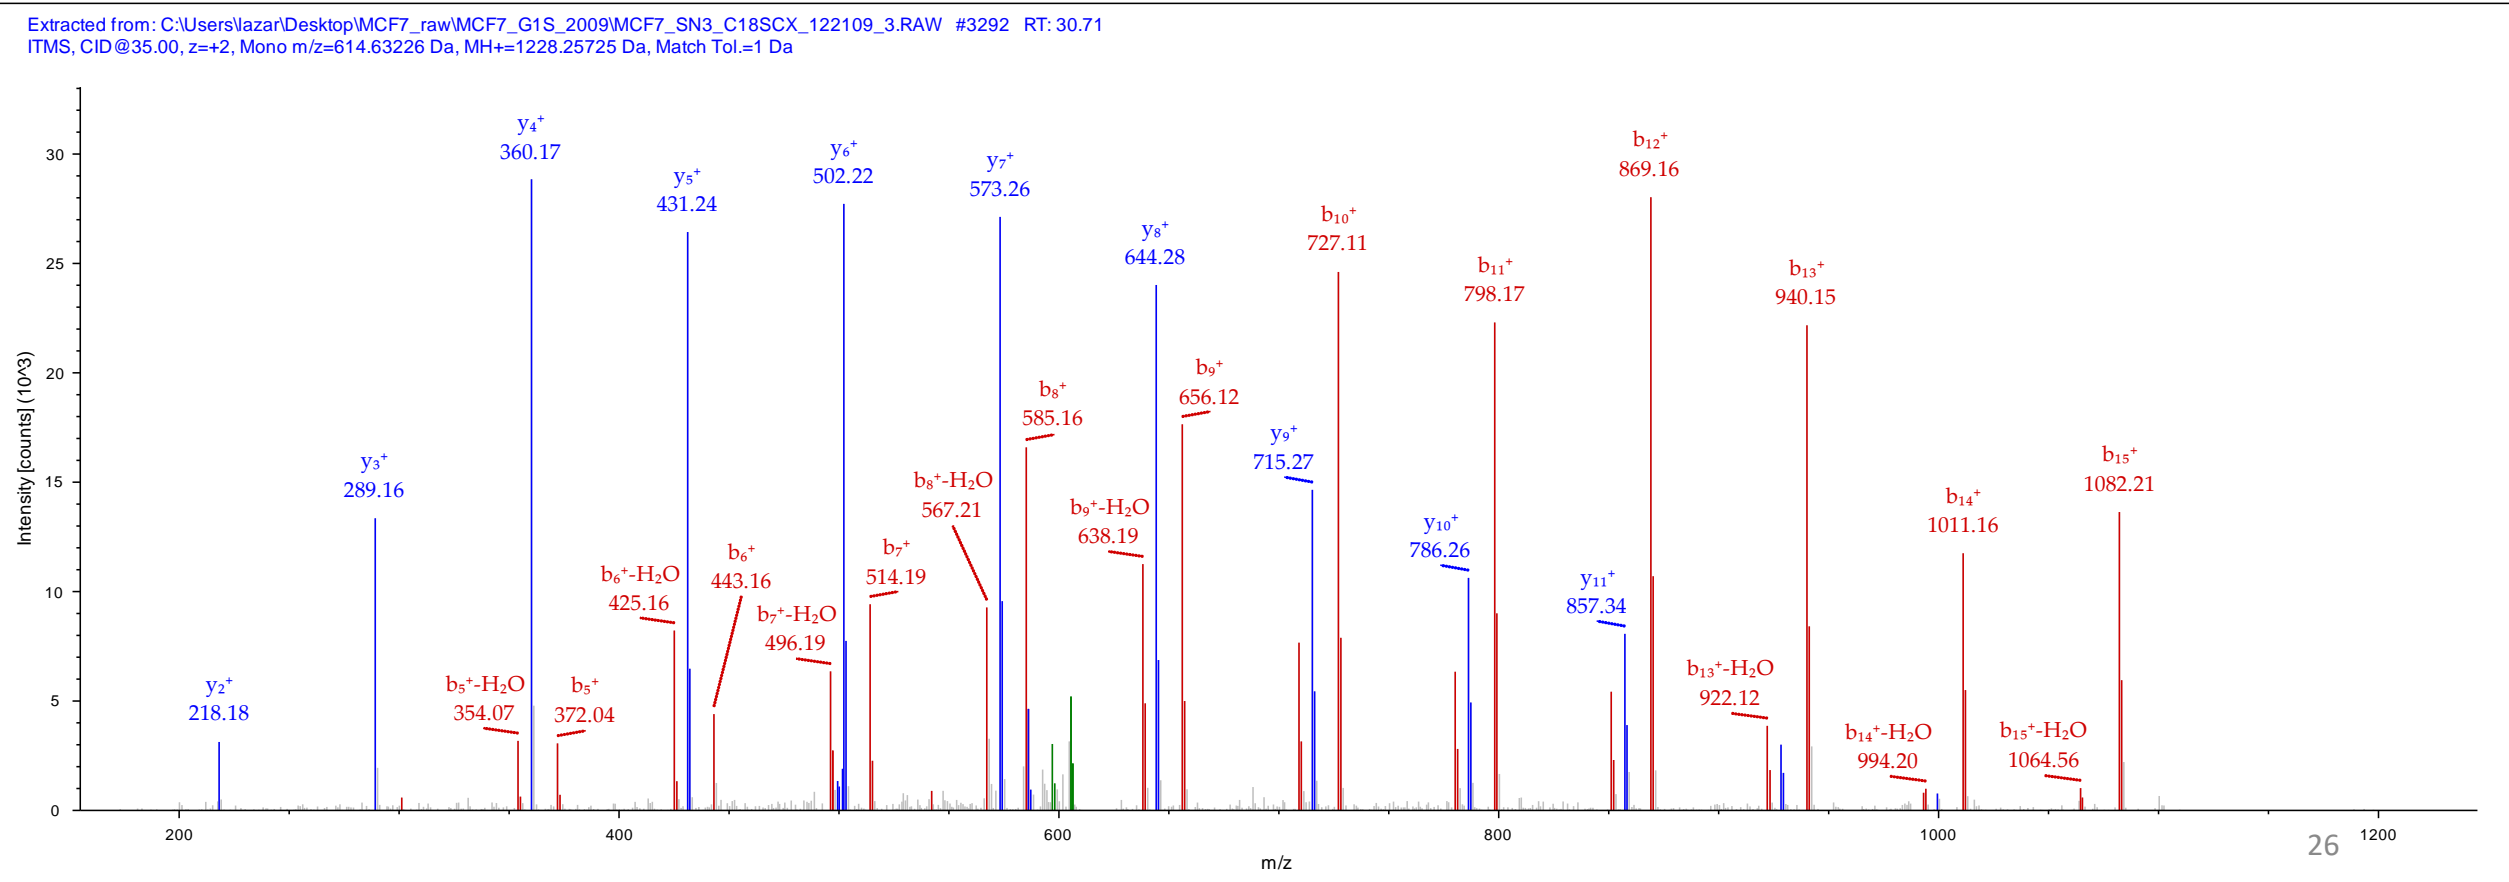

Sequence: HQGVMVGM CQKDSYVGDEA QSK, Charge: +3, Monoisotopic m/z: 799.20000 Da (-493.03 mmu/-616.9 ppm), MH+: 2395.58545 Da, RT: 44.51 min

Identified with: Sequest HT (v1.3); XCorr:4.59

Fragment match tolerance used for search: 1 Da

Fragments used for search: a; a-H<sub>2</sub>O; a-NH<sub>3</sub>; b; b-H<sub>2</sub>O; b-NH<sub>3</sub>; y; y-H<sub>2</sub>O; y-NH<sub>3</sub>

**Protein references** (1): c.148G>T p.G50C|VGM CQKD|Missense|COSMIC|Ovary(1) CANCER\_sp\_P68133,ACTS\_HUMAN Actin, alpha skeletal muscle

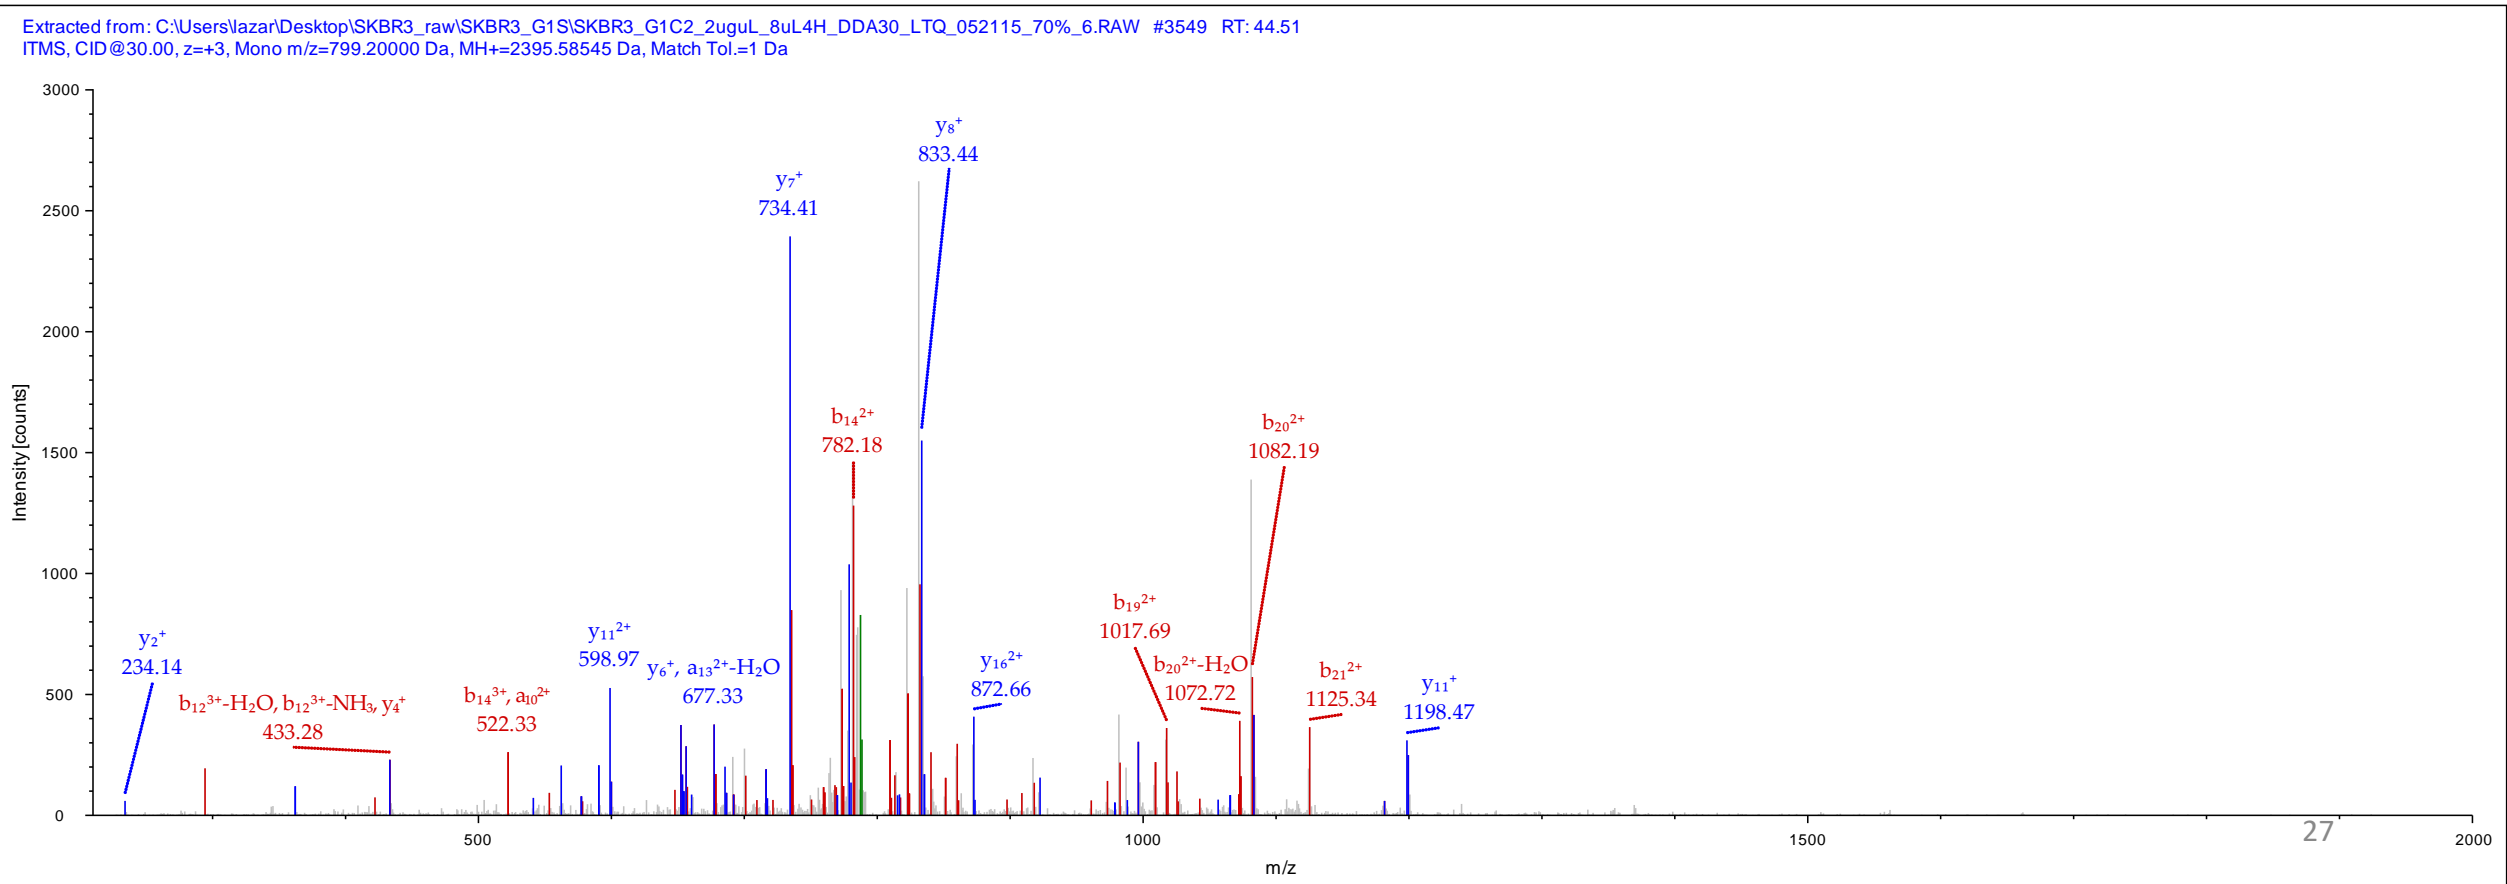

Sequence: HRILPEKYPPPTPELLDLQPLPVSLR, Charge: +3, Monoisotopic m/z: 998.86000 Da (+622.78 mmu/+623.49 ppm), MH+: 2994.56545 Da, RT: 141.61 min

Identified with: Sequest HT (v1.3); XCorr:4.56

Fragment match tolerance used for search: 1 Da

Fragments used for search: a; a-H<sub>2</sub>O; a-NH<sub>3</sub>; b; b-H<sub>2</sub>O; b-NH<sub>3</sub>; y; y-H<sub>2</sub>O; y-NH<sub>3</sub>

**Protein references (1):** c.3866T>G p.L1289R|FRHRILP|Missense|COSMIC|Large intestine(1) CANCER\_sp\_O75643,U520\_HUMAN U5 small nuclear ribonucleoprotein 200 kDa helicase

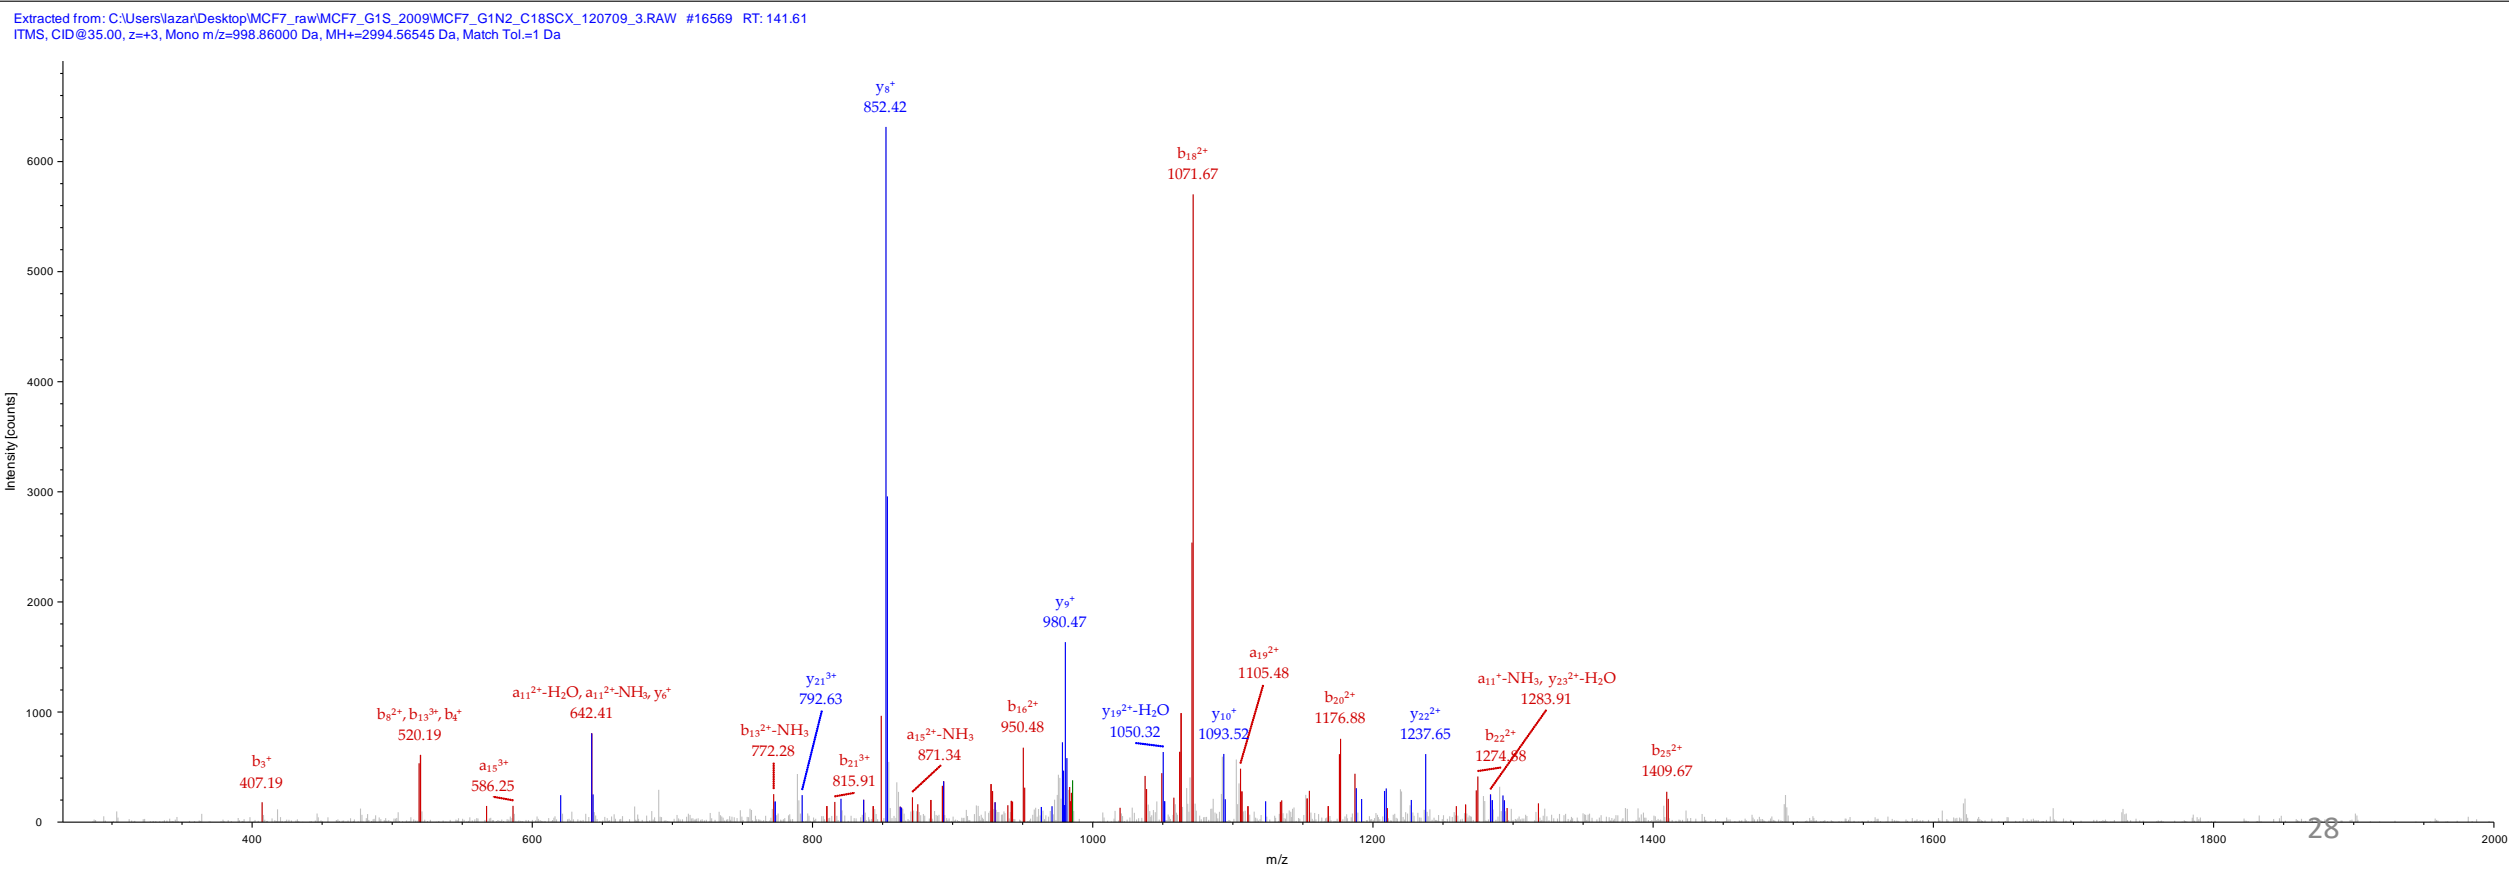

Sequence: IMSLVDPNHCGLVTFQAFIDFMSR, Charge: +3, Monoisotopic m/z: 915.92000 Da (+1474.58 mmu/+1609.94 ppm), MH+: 2745.74545 Da, RT: 171.51 min

Identified with: Sequest HT (v1.3); XCorr:4.93

Fragment match tolerance used for search: 1 Da

Fragments used for search: a; a-H<sub>2</sub>O; a-NH<sub>3</sub>; b; b-H<sub>2</sub>O; b-NH<sub>3</sub>; y; y-H<sub>2</sub>O; y-NH<sub>3</sub>

**Protein references (1):** c.2467A>T p.S823C|PNHCGLV|Missense|COSMIC|Lung(2) CANCER\_sp\_O43707,ACTN4\_HUMAN Alpha-actinin-4

Extracted from: C:\Users\lazar\Desktop\MCF7\_raw\MCF7\_G1S\_2009\MCF7\_G1N2\_C18SCX\_120609\_1.RAW #20359 RT: 171.51  
ITMS, CID@35.00, z=+3, Mono m/z=915.92000 Da, MH+=2745.74545 Da, Match Tol.=1 Da

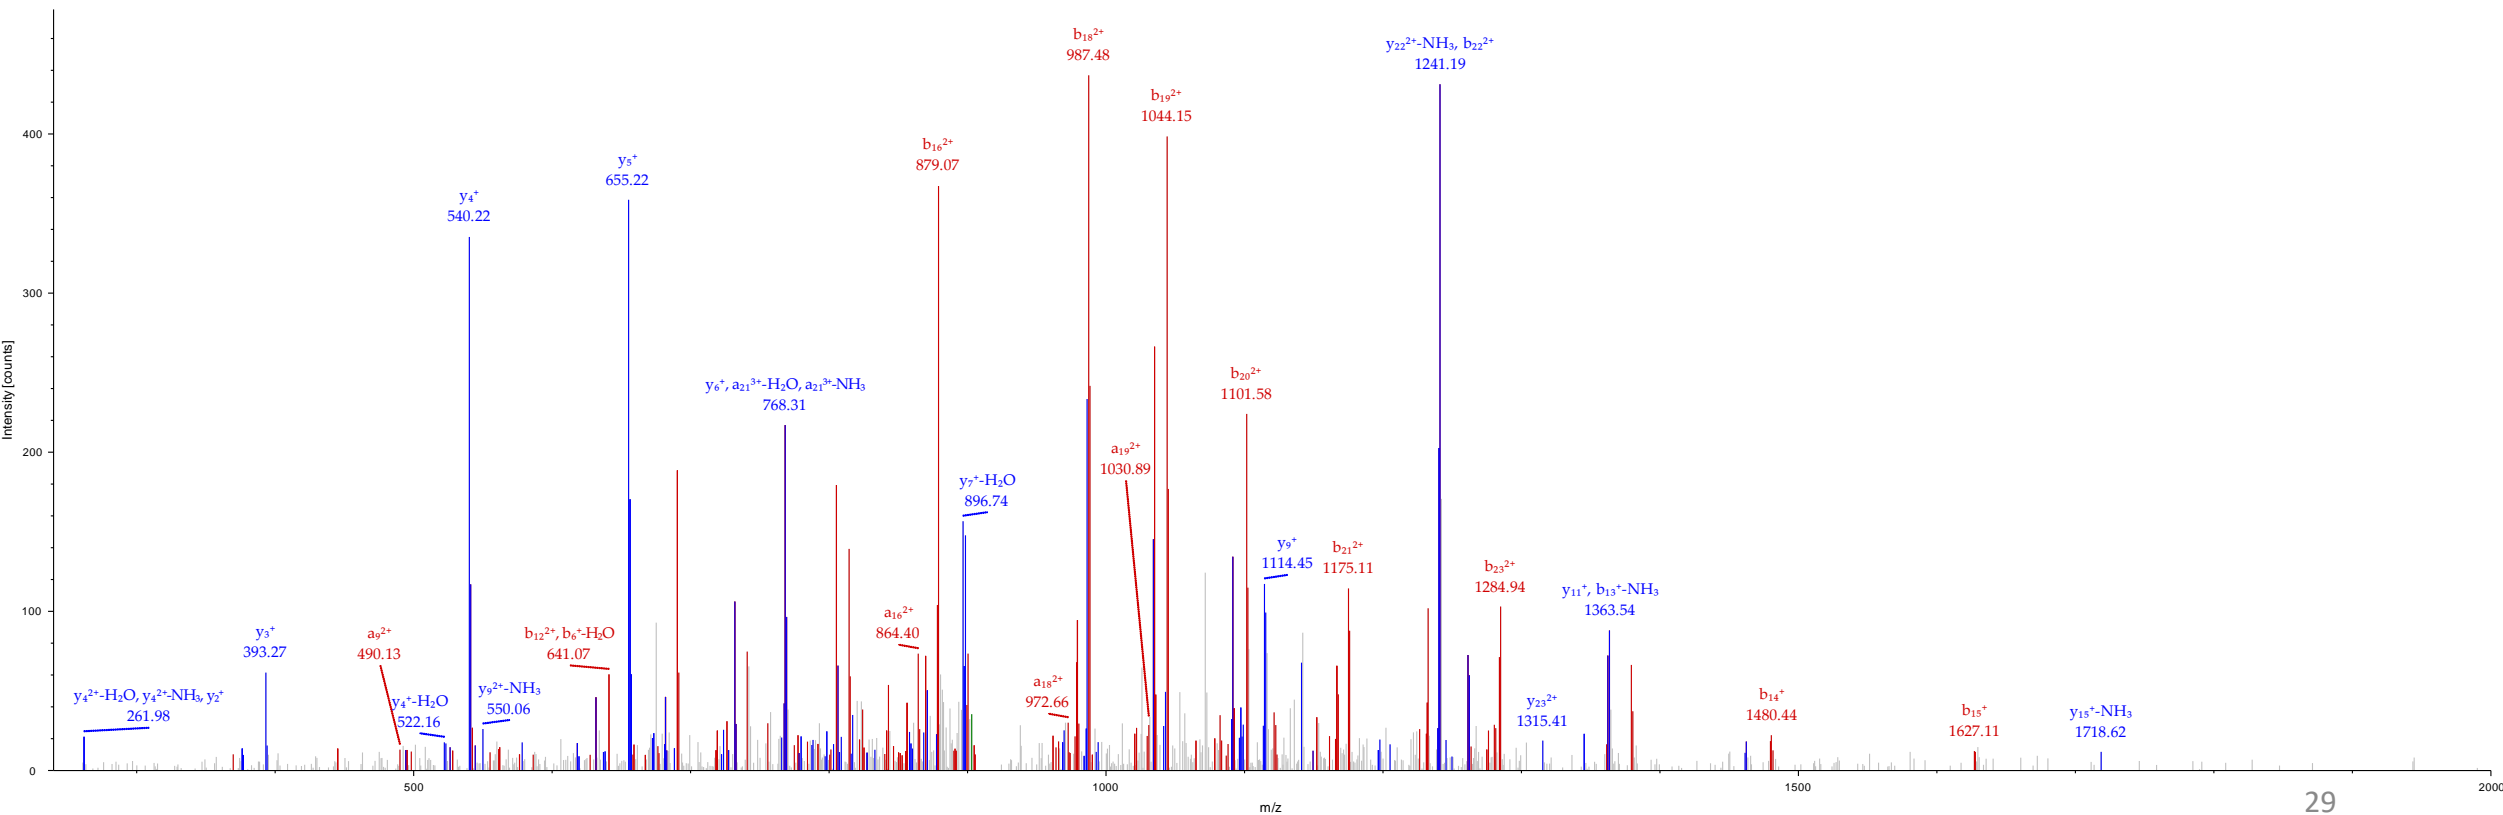

Sequence: KHTLSFVDVGTGK, Charge: +2, Monoisotopic m/z: 694.70087 Da (-179.55 mmu/-258.46 ppm), MH+: 1388.39446 Da, RT: 33.85 min

Identified with: Sequest HT (v1.3); XCorr:3.87

Fragment match tolerance used for search: 1 Da

Fragments used for search: a; a-H<sub>2</sub>O; a-NH<sub>3</sub>; b; b-H<sub>2</sub>O; b-NH<sub>3</sub>; y; y-H<sub>2</sub>O; y-NH<sub>3</sub>

**Protein references** (1): c.1886A>T p.Y629F|TLSFVDV|Missense|COSMIC|Adrenal gland(1) CANCER\_sp\_P31040,DHSA\_HUMAN Succinate dehydrogenase [ubiquinone] flavoprotein subunit, mitochondrial

Extracted from: C:\Users\lazar\Desktop\MCF7\_raw\MCF7\_G1S\_2009\MCF7\_SC1\_C18SCX\_120409\_3.RAW #2878 RT: 33.85  
ITMS, CID@35.00, z=+2, Mono m/z=694.70087 Da, MH+=1388.39446 Da, Match Tol.=1 Da

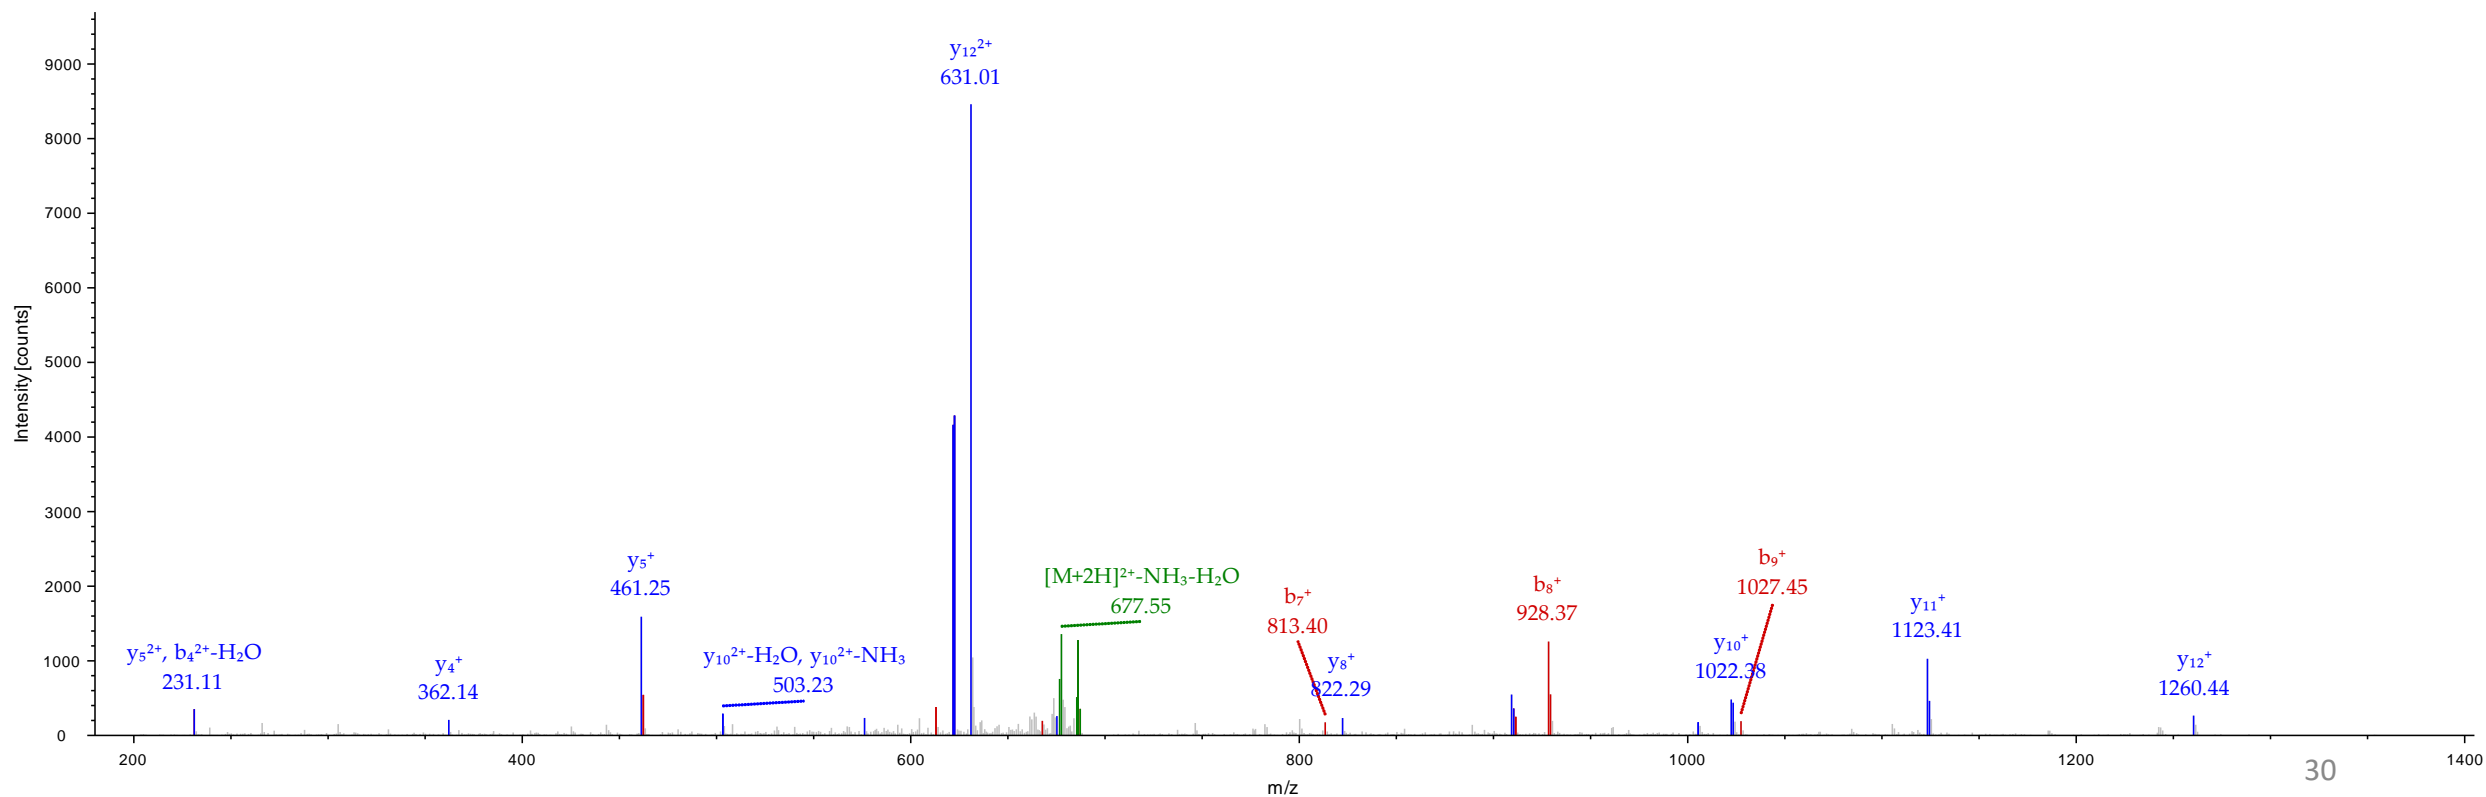

Sequence: KSQESLTENPSETLKPATSISSSTQTKGINVK, Charge: +4, Monoisotopic m/z: 847.12000 Da (-1326.64 mmu/-1566.05 ppm), MH+: 3385.45817 Da, RT: 182.97 min

Identified with: Sequest HT (v1.3); XCorr:4.22

Fragment match tolerance used for search: 1 Da

Fragments used for search: a; a-H<sub>2</sub>O; a-NH<sub>3</sub>; b; b-H<sub>2</sub>O; b-NH<sub>3</sub>; y; y-H<sub>2</sub>O; y-NH<sub>3</sub>

**Protein references (1):** c.5204T>C p.I1735T|ISSTSQT|Missense|COSMIC|Large intestine(1)

CANCER\_tr\_F5GXV7,F5GXV7\_HUMAN Neurobeachin

Extracted from: C:\Users\lazar\Desktop\MCF10\_raw\MCF10\_Raw\_2011\MCF10\_G1C1\_C18SCX\_102111\_1.RAW #20254 RT: 182.97  
ITMS, CID@35.00, z=+4, Mono m/z=847.12000 Da, MH+=3385.45817 Da, Match Tol.=1 Da

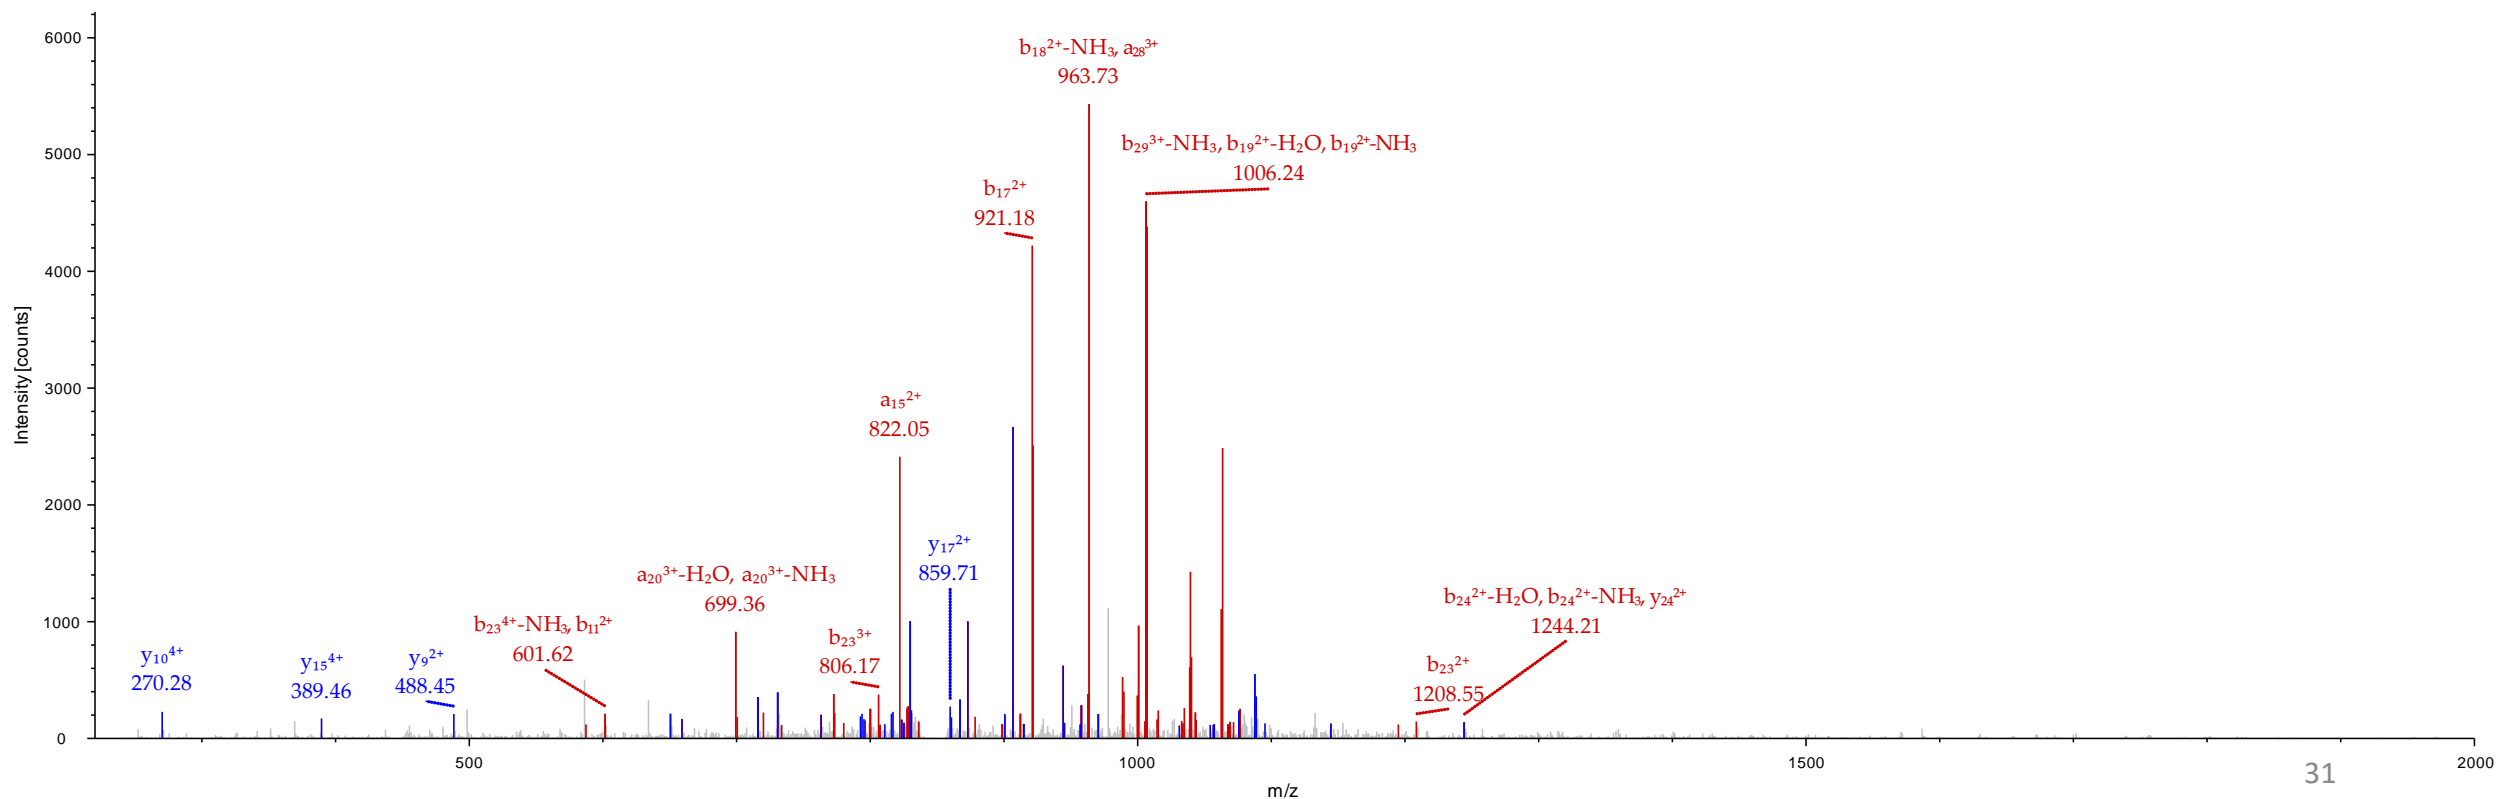

Sequence: LCGLLVLGSWCISVMGFLLETLILR, Charge: +3, Monoisotopic m/z: 951.30000 Da (+438.94 mmu/+461.41 ppm),

MH+: 2851.88545 Da, RT: 191.79 min

Identified with: Sequest HT (v1.3); XCorr:4.25

Fragment match tolerance used for search: 1 Da

Fragments used for search: a; a-H<sub>2</sub>O; b; b-H<sub>2</sub>O; y; y-H<sub>2</sub>O; y-NH<sub>3</sub>

**Protein references (1):** c.467C>T p.S156F|VMGFLLE|Missense|COSMIC|Kidney(1) CANCER\_sp\_O60412,OR7C2\_HUMAN

Olfactory receptor 7C2

Extracted from: C:\Users\lazar\Desktop\MCF10\_raw\MCF10\_Raw\_2011\MCF10\_G1C1\_C18SCX\_101311\_3.RAW #21446 RT: 191.79  
ITMS, CID@35.00, z=+3, Mono m/z=951.30000 Da, MH+=2851.88545 Da, Match Tol.=1 Da

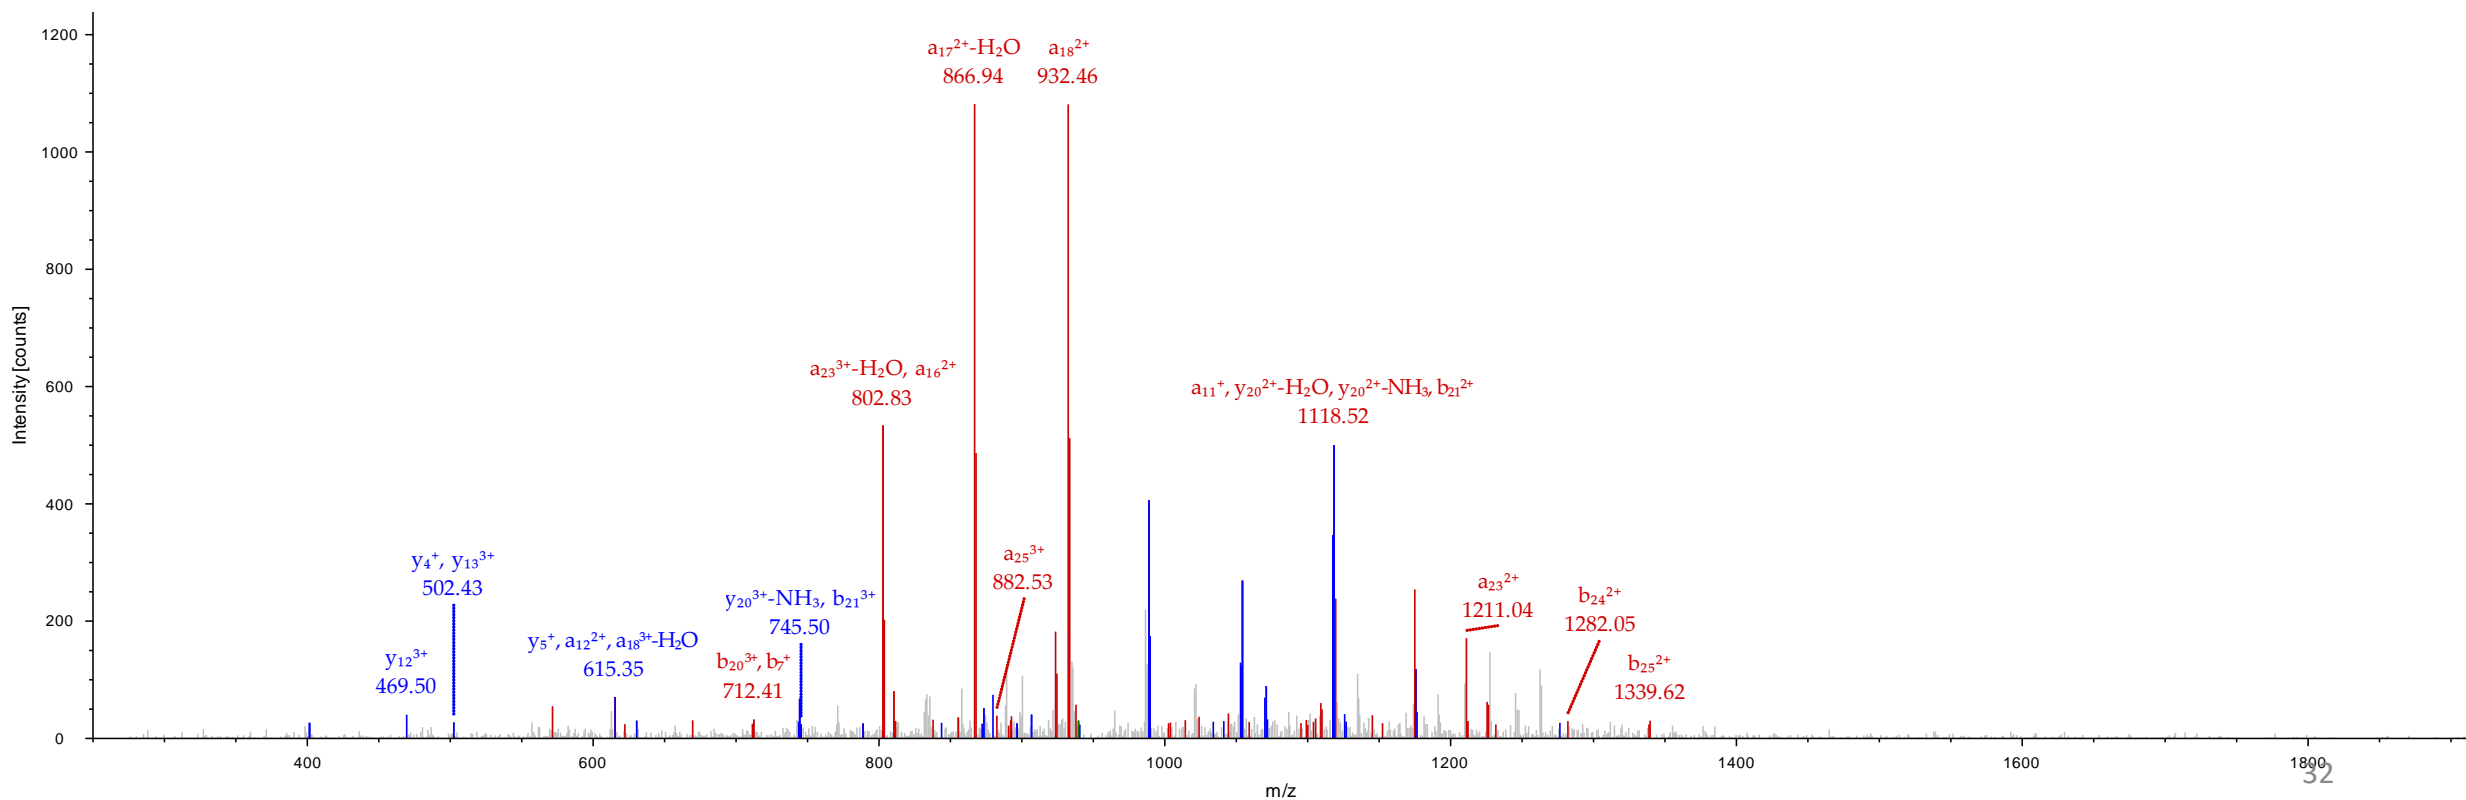



Sequence: LCYVALYFEQEMATAASSSSLEK, Charge: +2, Monoisotopic m/z: 1271.78000 Da (+682.21 mmu/+536.42 ppm), MH+: 2542.55272 Da, RT: 128.71 min

Identified with: Sequest HT (v1.3); XCorr:4.33

Fragment match tolerance used for search: 1 Da

Fragments used for search: a; a-H<sub>2</sub>O; a-NH<sub>3</sub>; b; b-H<sub>2</sub>O; b-NH<sub>3</sub>; y; y-H<sub>2</sub>O; y-NH<sub>3</sub>

**Protein references (1):** c.2764G>T p.D922Y|VALYFEQ|Missense|COSMIC|Endometrium(1);Lung(1)

CANCER\_sp\_Q6S8J3,POTEE\_HUMAN POTE ankyrin domain family member E

Extracted from: C:\Users\lazar\Desktop\MCF7\_raw\MCF7\_G1S\_2009\MCF7\_SN1\_C18SCX\_120209\_1.RAW #15825 RT: 128.71  
ITMS, CID@35.00, z=+2, Mono m/z=1271.78000 Da, MH+=2542.55272 Da, Match Tol.=1 Da

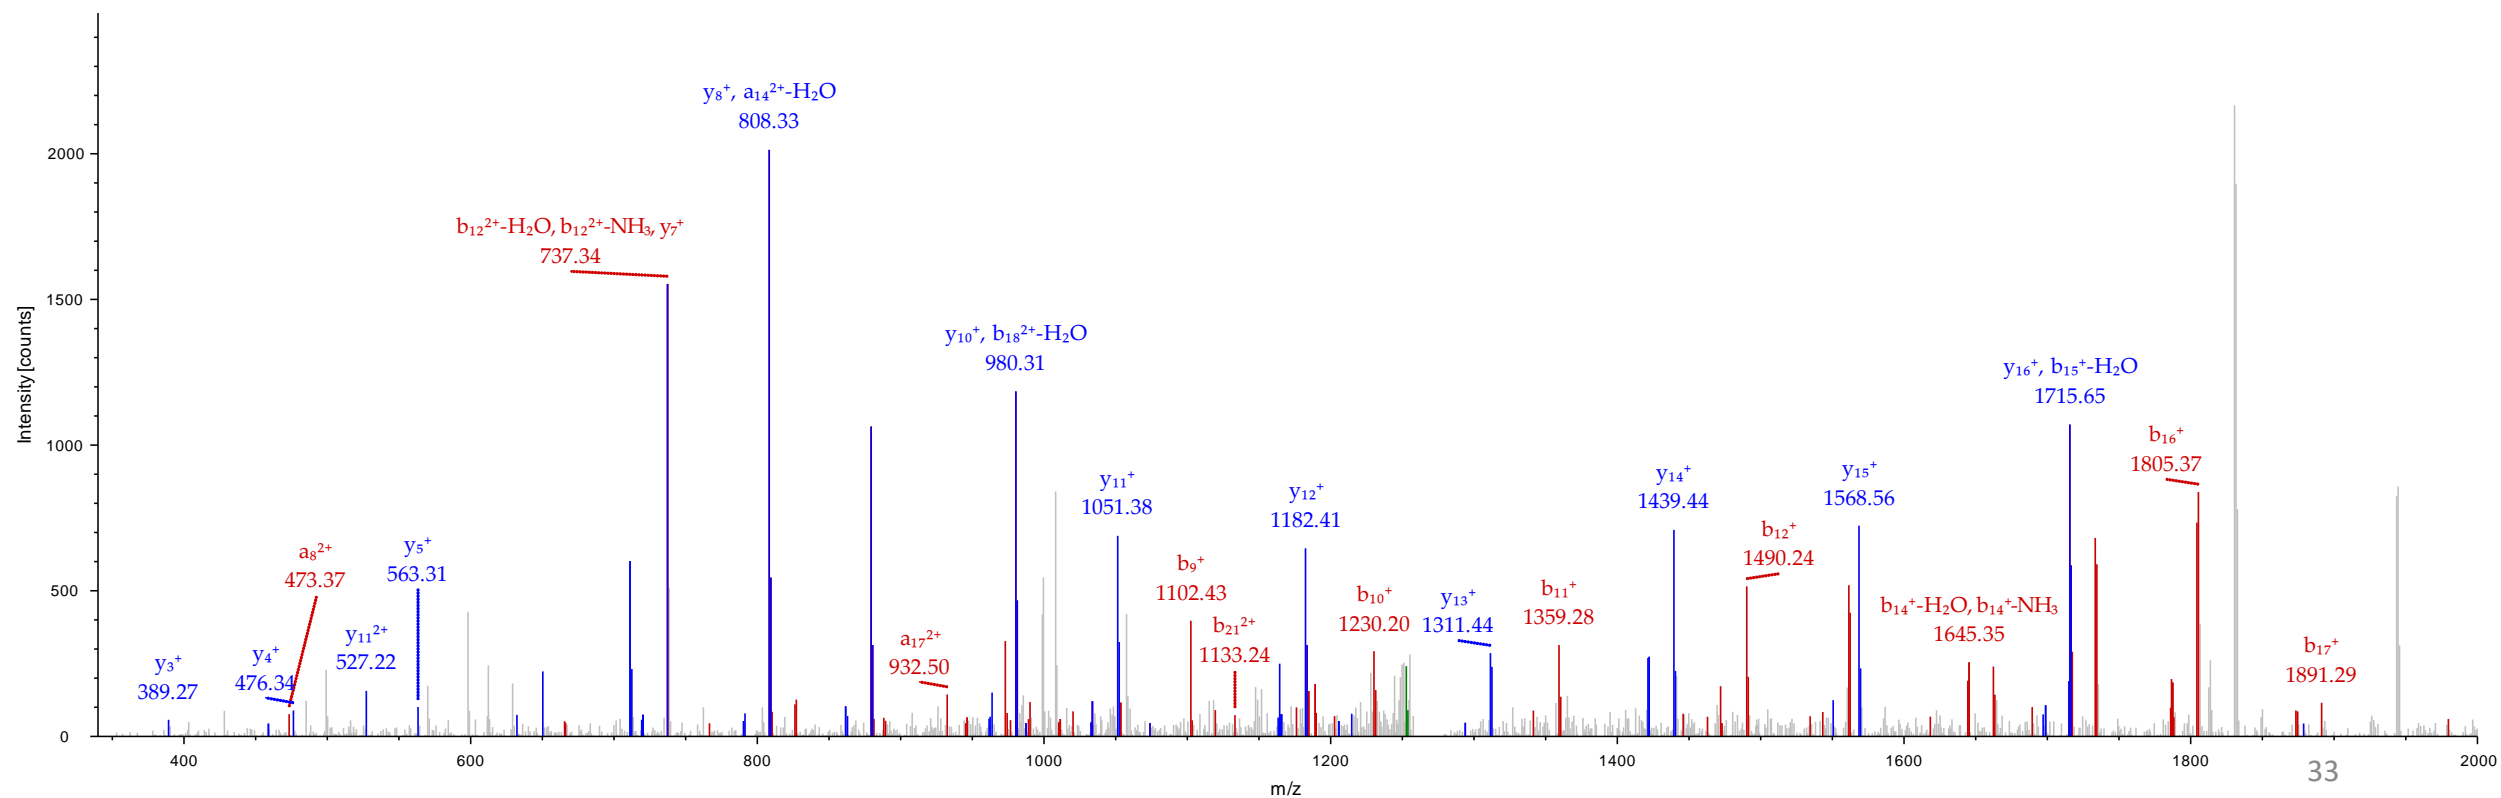

Sequence: LDTNSDGQLDYSEFLNLIGGLAMACHDSFLK, Charge: +3, Monoisotopic m/z: 1131.08000 Da (+1213.43 mmu/+1072.81 ppm), MH+: 3391.22545 Da, RT: 210.16 min

Identified with: Sequest HT (v1.3); XCorr:4.03

Fragment match tolerance used for search: 1 Da

Fragments used for search: a; a-H<sub>2</sub>O; a-NH<sub>3</sub>; b; b-H<sub>2</sub>O; b-NH<sub>3</sub>; y; y-H<sub>2</sub>O; y-NH<sub>3</sub>

**Protein references** (1): c.230T>A p.F77Y|QLDYSEF| Missense| COSMIC| Ovary(1) CANCER\_sp\_P31949,S10AB\_HUMAN Protein S100-A11

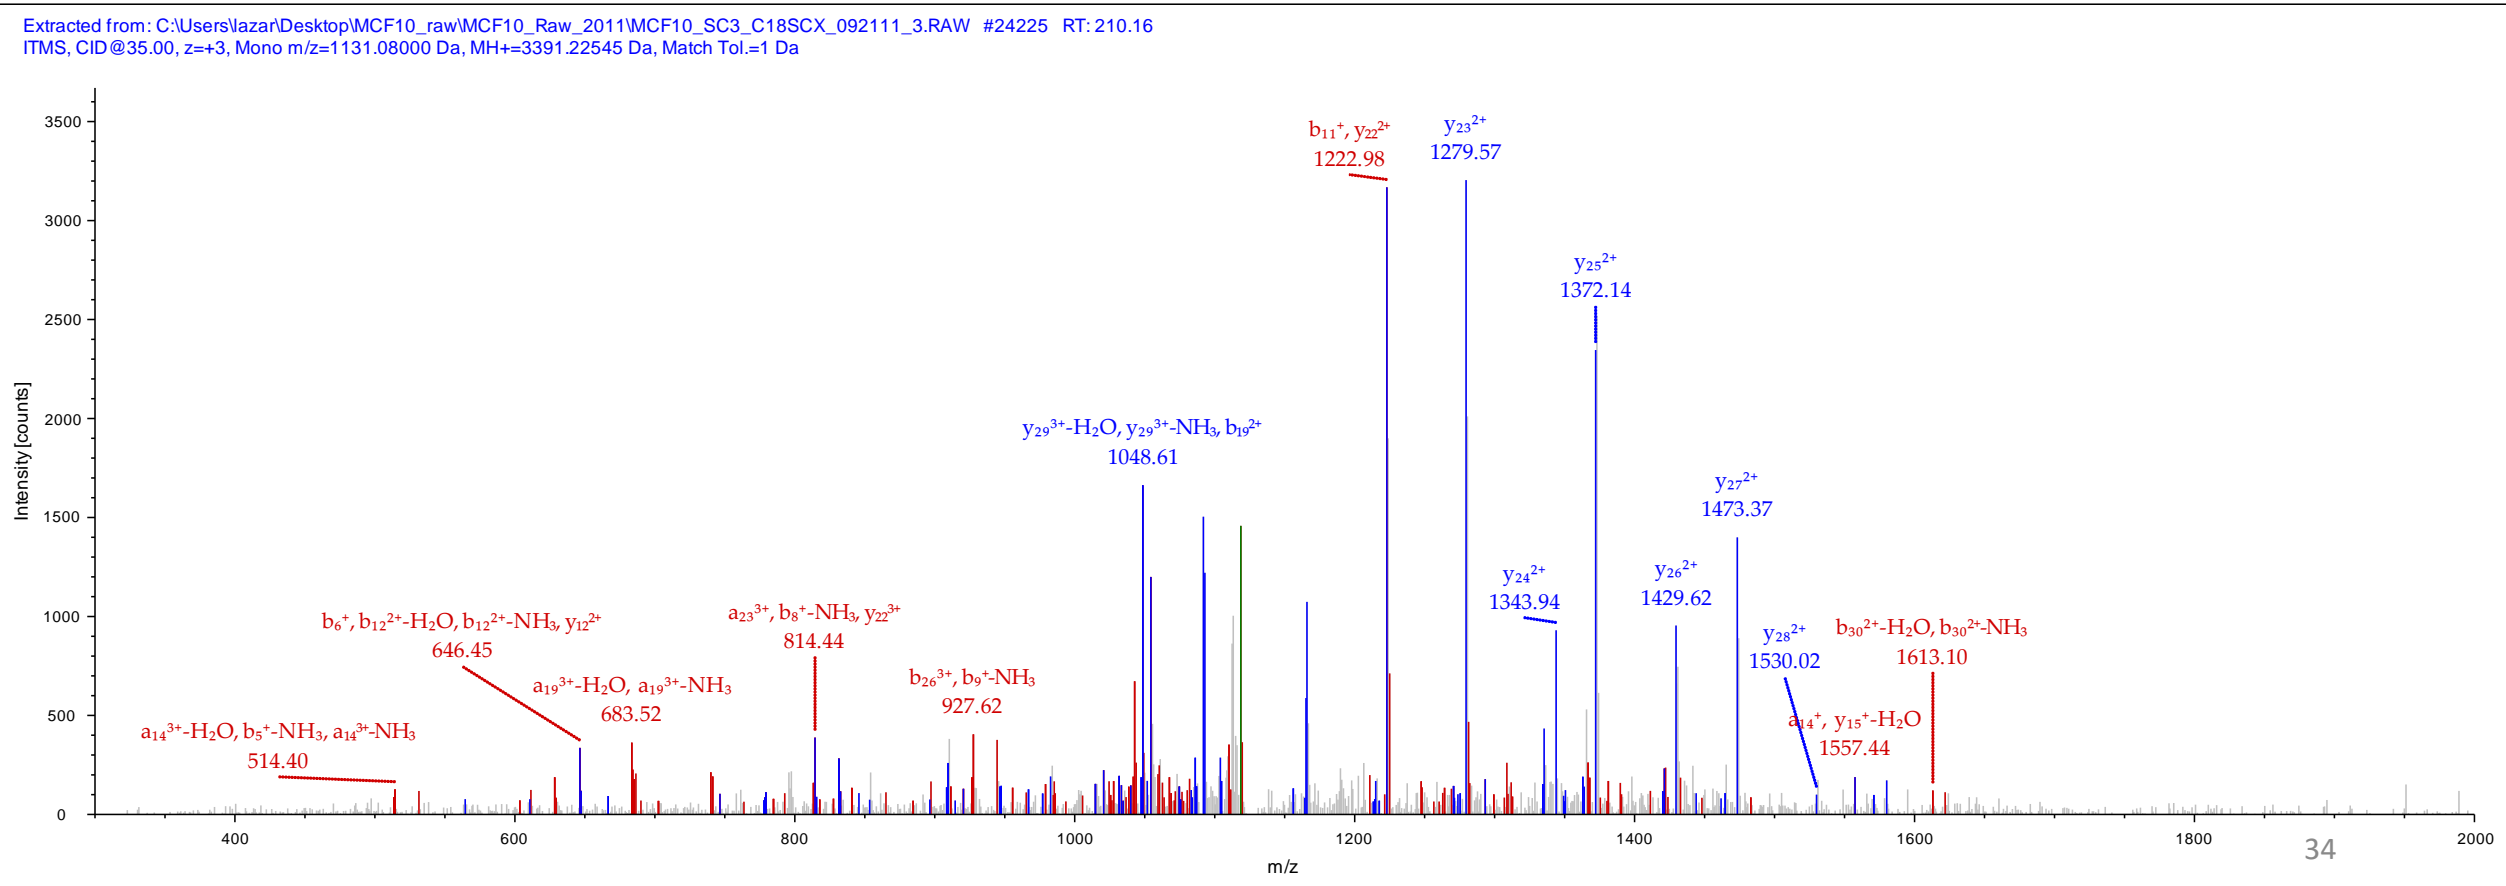

Sequence: LFDHLESPTPNPTEPLFLAQAQEVYK, Charge: +3, Monoisotopic m/z: 952.94000 Da (+120.05 mmu/+125.98 ppm),

MH+: 2856.80545 Da, RT: 108.60 min

Identified with: Sequest HT (v1.3); XCorr:5.80

Fragment match tolerance used for search: 1 Da

Fragments used for search: a; a-H<sub>2</sub>O; a-NH<sub>3</sub>; b; b-H<sub>2</sub>O; b-NH<sub>3</sub>; y; y-H<sub>2</sub>O; y-NH<sub>3</sub>

**Protein references** (1): c.2915C>T p.P972L|FDHLESP|Missense|COSMIC|Lung(1) CANCER\_sp\_P49327,FAS\_HUMAN Fatty acid synthase

Extracted from: C:\Users\lazar\Desktop\SKBR3\_raw\SKBR3\_G1S\SKBR3\_SC3\_2uguL\_8uL4H\_DDA30\_LTQ\_041715\_70%\_1.RAW #11784 RT: 108.60  
ITMS, CID@30.00, z=+3, Mono m/z=952.94000 Da, MH+=2856.80545 Da, Match Tol.=1 Da

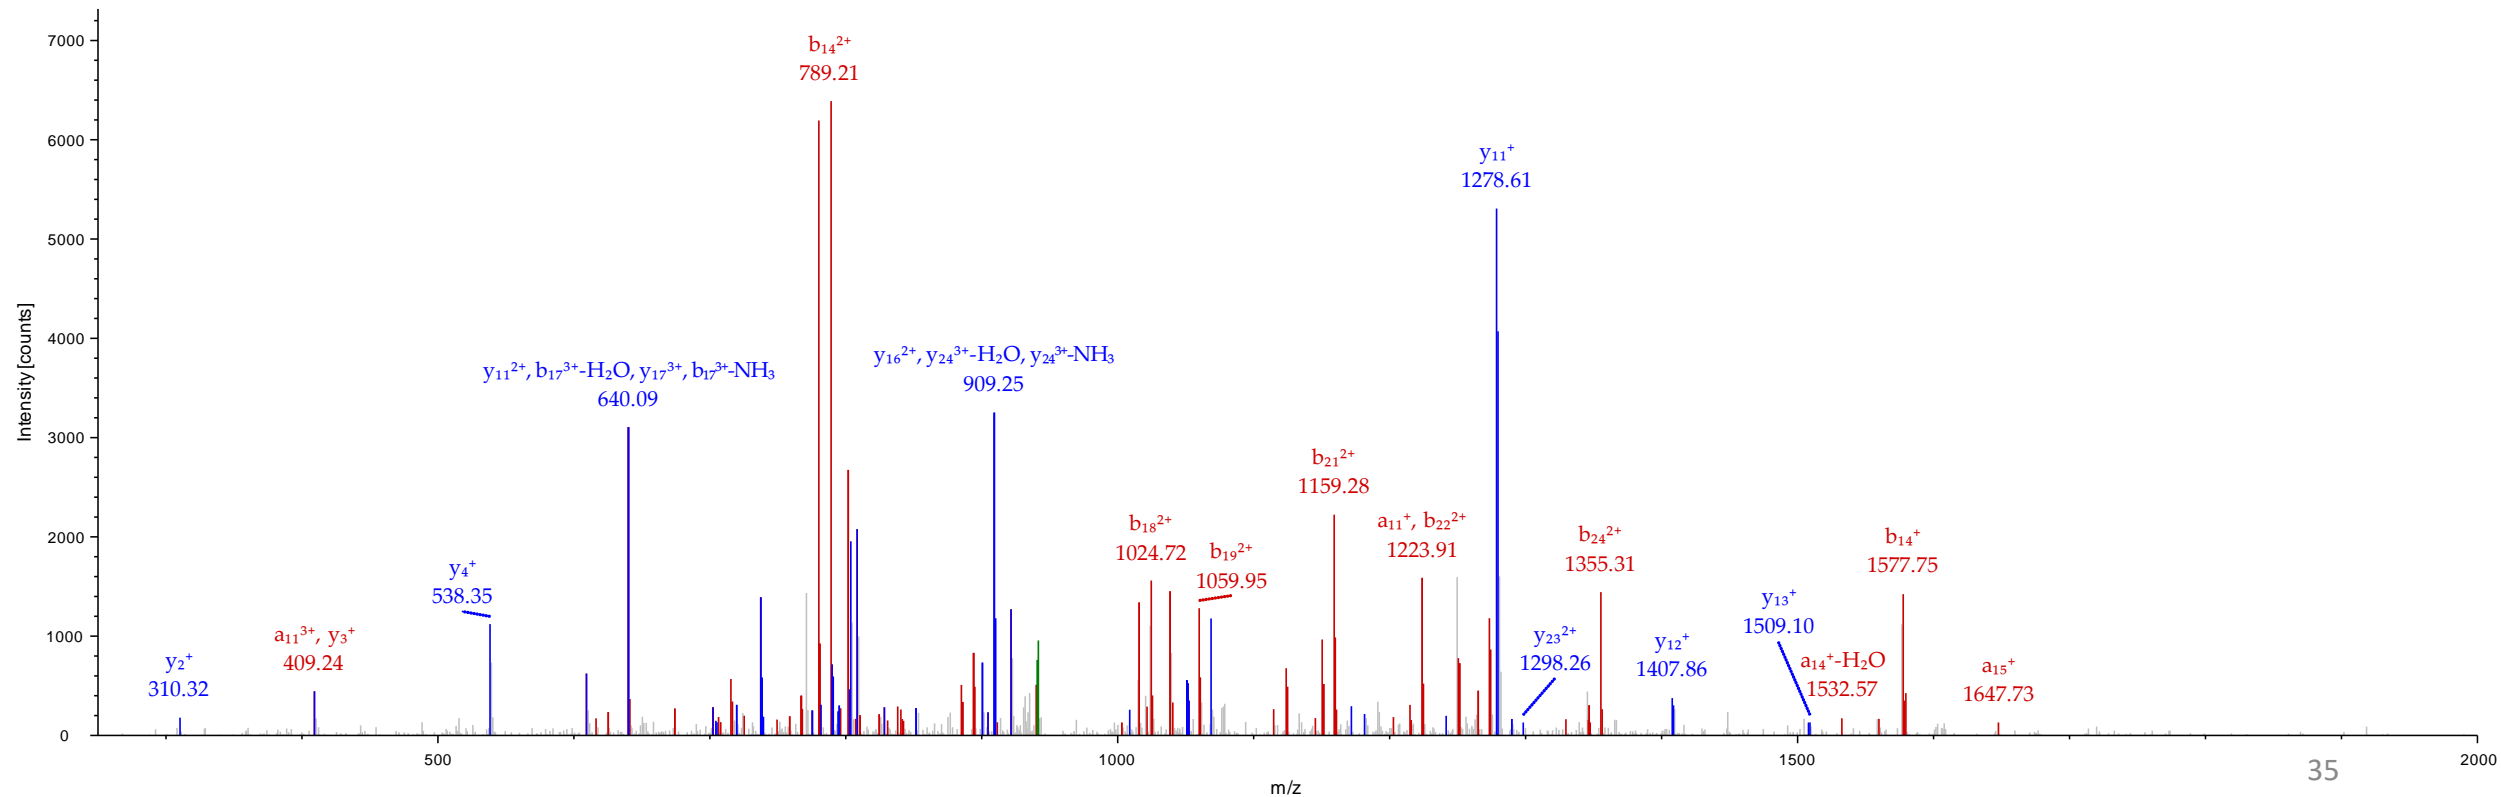

Sequence: LFLASLAAAGSGTDAQVALENEVK, Charge: +3, Monoisotopic m/z: 792.46000 Da (+40.05 mmu/+50.53 ppm), MH+: 2375.36545 Da, RT: 208.31 min

Identified with: Sequest HT (v1.3); XCorr:4.11

Fragment match tolerance used for search: 1 Da

Fragments used for search: a; a-H<sub>2</sub>O; a-NH<sub>3</sub>; b; b-H<sub>2</sub>O; b-NH<sub>3</sub>; y; y-H<sub>2</sub>O; y-NH<sub>3</sub>

**Protein references** (1): c.6458T>A p.V2153E | VALENEV | Missense | COSMIC | Lung(1) OR

co | HUWE1 | c.6047T>A | p.V2016E | VALENEV | Missense | COSMIC | Lung(1) CANCER\_sp\_Q7Z6Z7, HUWE1\_HUMAN E3 ubiquitin-protein ligase HUWE1

Extracted from: C:\Users\lazar\Desktop\SKBR3\_raw\SKBR3\_G1S\SKBR3\_SC3\_2uguL\_8uL4H\_DDA30\_LTQ\_041715\_70%\_1.RAW #22425 RT: 208.31  
ITMS, CID@30.00, z=+3, Mono m/z=792.46000 Da, MH+=2375.36545 Da, Match Tol.=1 Da

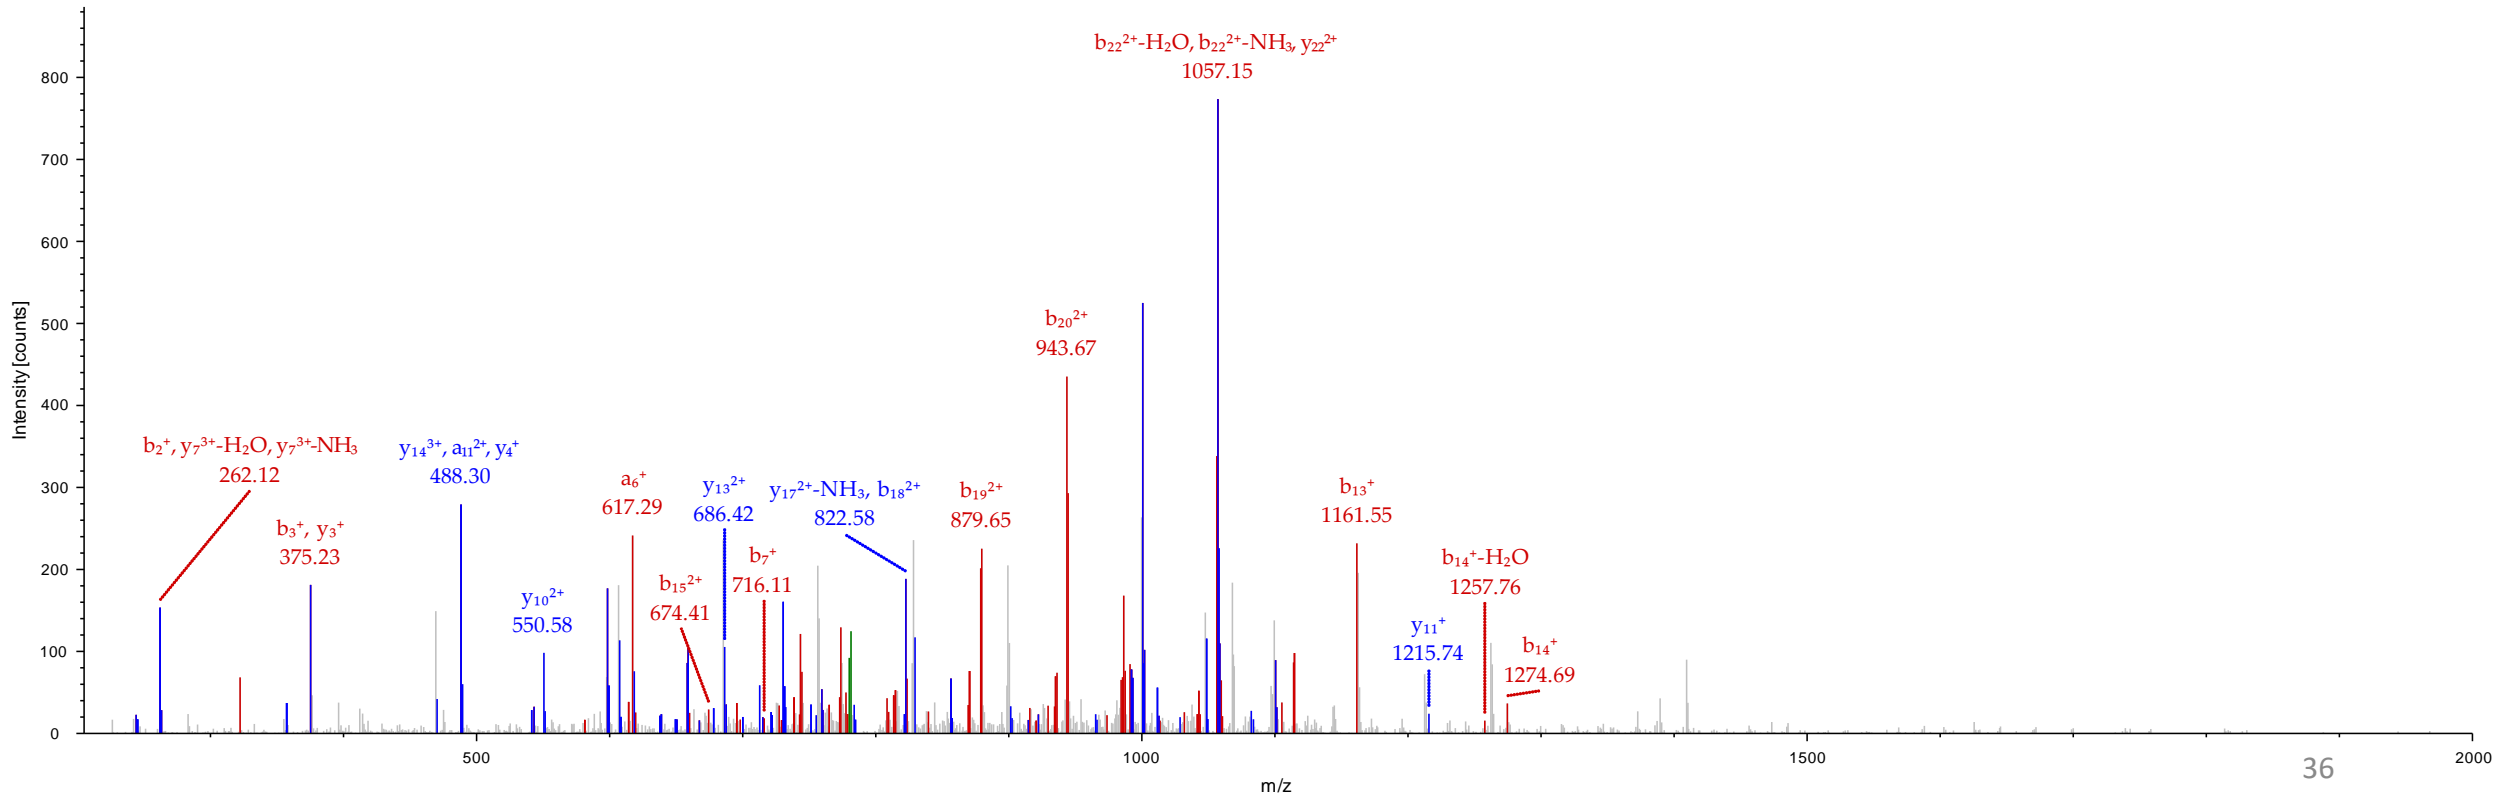

Sequence: LTENLSALQR, Charge: +2, Monoisotopic m/z: 574.58000 Da (+1761.85 mmu/+3066.33 ppm), MH+: 1148.15272 Da, RT: 61.66 min

Identified with: Sequest HT (v1.3); XCorr:3.77

Fragment match tolerance used for search: 1 Da

Fragments used for search: a; a-H<sub>2</sub>O; a-NH<sub>3</sub>; b; b-H<sub>2</sub>O; b-NH<sub>3</sub>; y; y-H<sub>2</sub>O; y-NH<sub>3</sub>

**Protein references** (1): c.1193G>A p.R398Q|SALQRLQ| Missense | COSMIC | Prostate(2) CANCER\_sp\_Q8TD16-2,BICD2\_HUMAN Isoform 2 of Protein bicaudal D homolog 2

Extracted from: C:\Users\lazar\Desktop\MCF7\_raw\MCF7\_G1S\_2009\MCF7\_SC3\_C18SCX\_122209\_1.RAW #6061 RT: 61.66  
ITMS, CID@35.00, z=+2, Mono m/z=574.58000 Da, MH+=1148.15272 Da, Match Tol.=1 Da

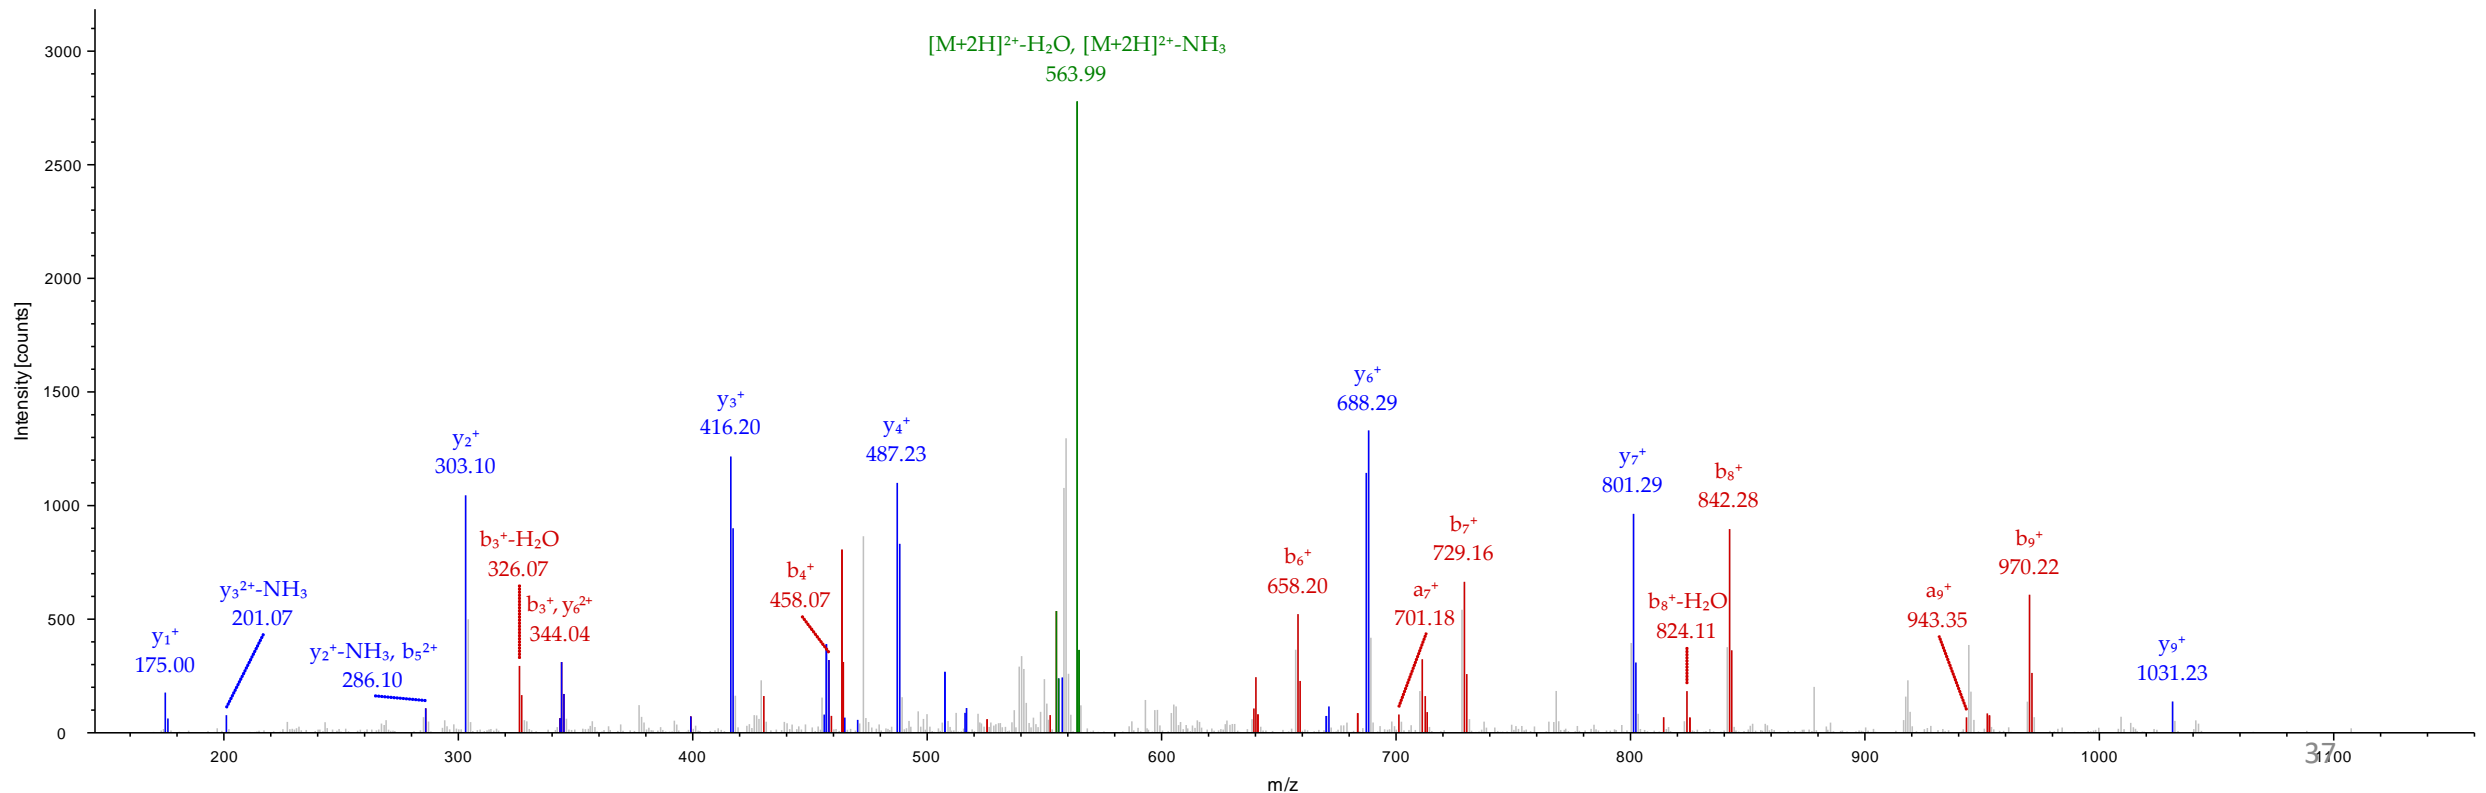

Sequence: LTQAQIFDYSEIPNFPR, Charge: +2, Monoisotopic m/z: 1020.34000 Da (+324.85 mmu/+318.38 ppm), MH+: 2039.67272 Da, RT: 102.09 min

Identified with: Sequest HT (v1.3); XCorr:4.37

Fragment match tolerance used for search: 1 Da

Fragments used for search: a; a-H<sub>2</sub>O; a-NH<sub>3</sub>; b; b-H<sub>2</sub>O; b-NH<sub>3</sub>; y; y-H<sub>2</sub>O; y-NH<sub>3</sub>

**Protein references** (1): c.151G>A p.G51S|FDYSEIP|Missense|COSMIC|Stomach(1) CANCER\_sp\_P00491,PNPH\_HUMAN Purine nucleoside phosphorylase

Extracted from: C:\Users\lazar\Desktop\MCF7\_raw\MCF7\_G1S\_2009\MCF7\_SC2\_C18SCX\_121409\_5.RAW #10816 RT: 102.09  
ITMS, CID@35.00, z=+2, Mono m/z=1020.34000 Da, MH+=2039.67272 Da, Match Tol.=1 Da

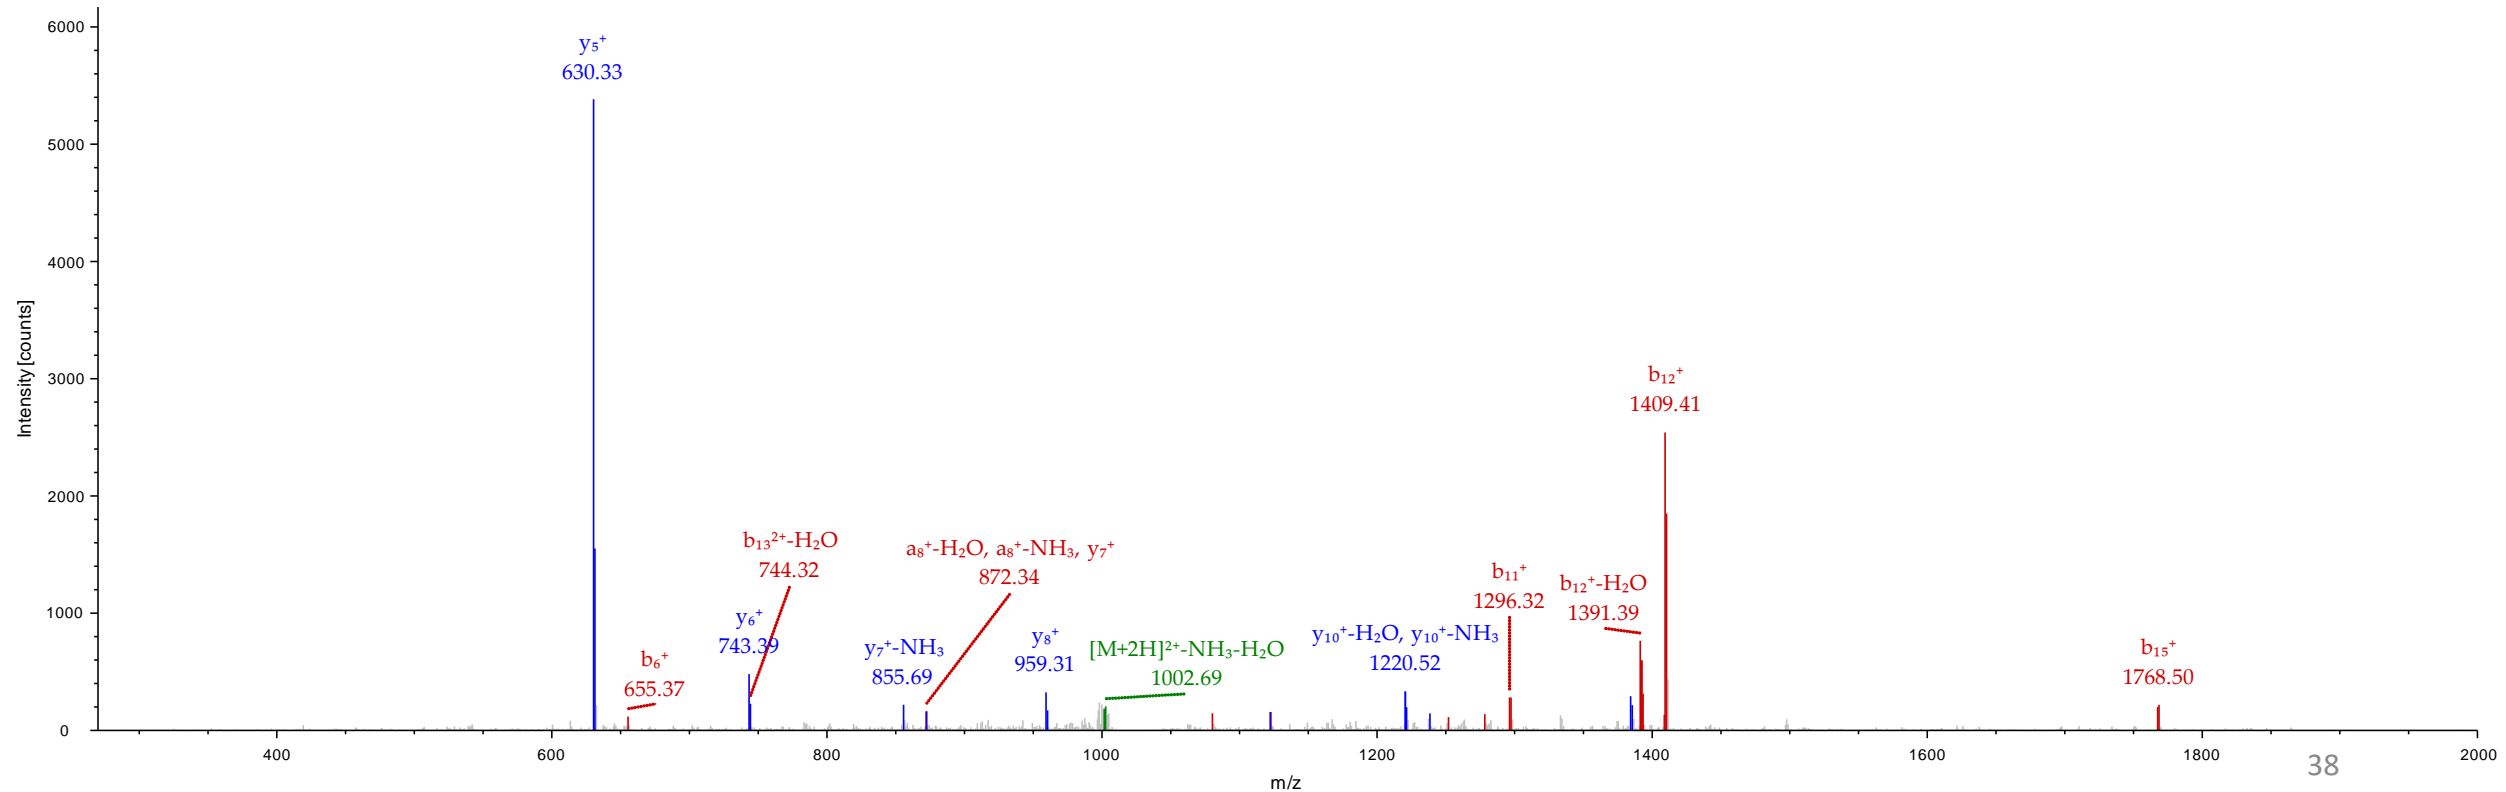

Sequence: MDATFIGNSTAIQELFK, Charge: +2, Monoisotopic m/z: 943.24000 Da (-232.02 mmu/-245.99 ppm), MH+: 1885.47272 Da, RT: 129.25 min,

Identified with: Sequest HT (v1.3); XCorr:4.97

Fragment match tolerance used for search: 1 Da

Fragments used for search: a; a-H<sub>2</sub>O; a-NH<sub>3</sub>; b; b-H<sub>2</sub>O; b-NH<sub>3</sub>; y; y-H<sub>2</sub>O; y-NH<sub>3</sub>

Protein references (1): c.1091C>A p.A364D | LKMDATF | Missense | COSMIC | Lung(1) CANCER\_sp\_P04350,TBB4A\_HUMAN  
Tubulin beta-4A chain

Extracted from: C:\Users\lazar\Desktop\SKBR3\_raw\SKBR3\_G1S\SKBR3\_SC1\_2uguL\_8uL4H\_DDA30\_LTQ\_032715\_70%\_4.RAW #15145 RT: 129.25  
ITMS, CID@30.00, z=+2, Mono m/z=943.24000 Da, MH+=1885.47272 Da, Match Tol.=1 Da

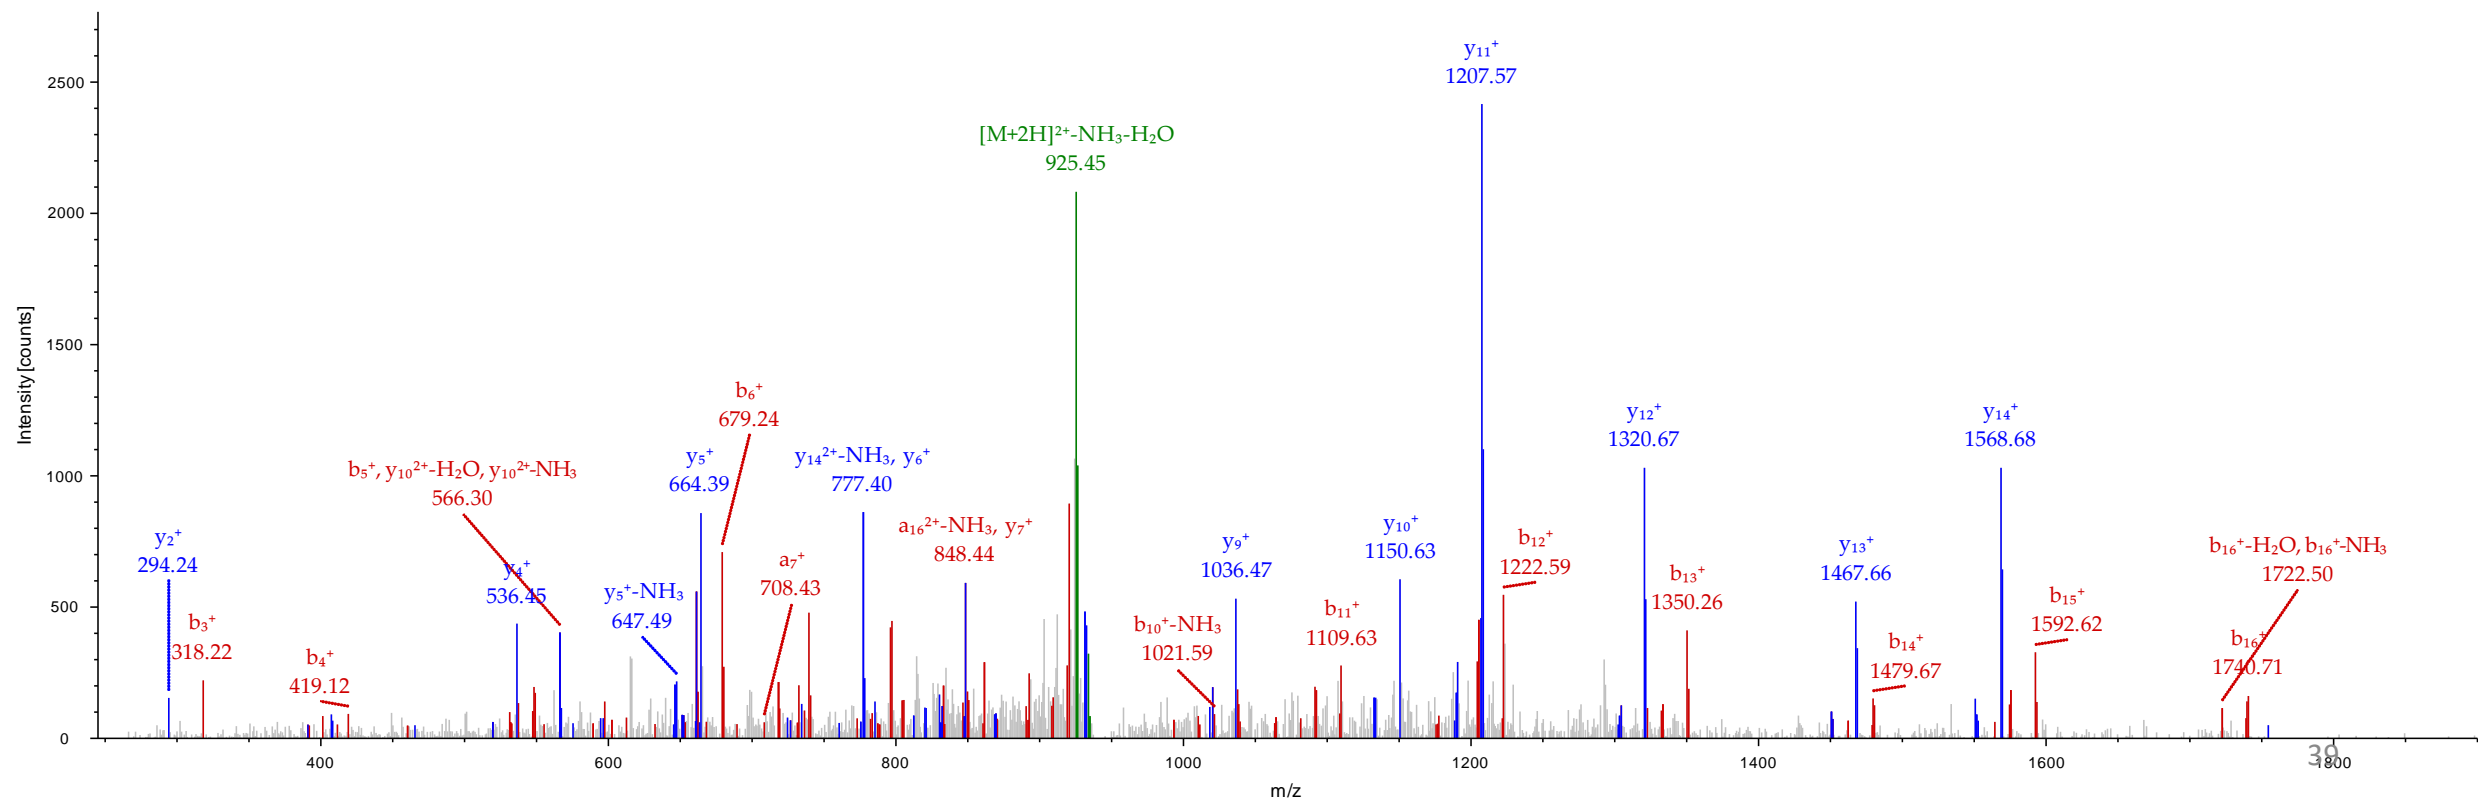

Sequence: MHDMNTDQENLVGTHDAPIR, Charge: +3, Monoisotopic m/z: 764.80000 Da (-548.32 mmu/-716.94 ppm), MH+: 2292.38545 Da, RT: 30.14 min

Identified with: Sequest HT (v1.3); XCorr:4.49

Fragment match tolerance used for search: 1 Da

Fragments used for search: a; a-H<sub>2</sub>O; a-NH<sub>3</sub>; b; b-H<sub>2</sub>O; b-NH<sub>3</sub>; y; y-H<sub>2</sub>O; y-NH<sub>3</sub>

**Protein references** (1): c.250T>A p.L84M | MHDMNTD | Missense | COSMIC | Skin(2) CANCER\_sp\_O43684, BUB3\_HUMAN Mitotic checkpoint protein BUB3

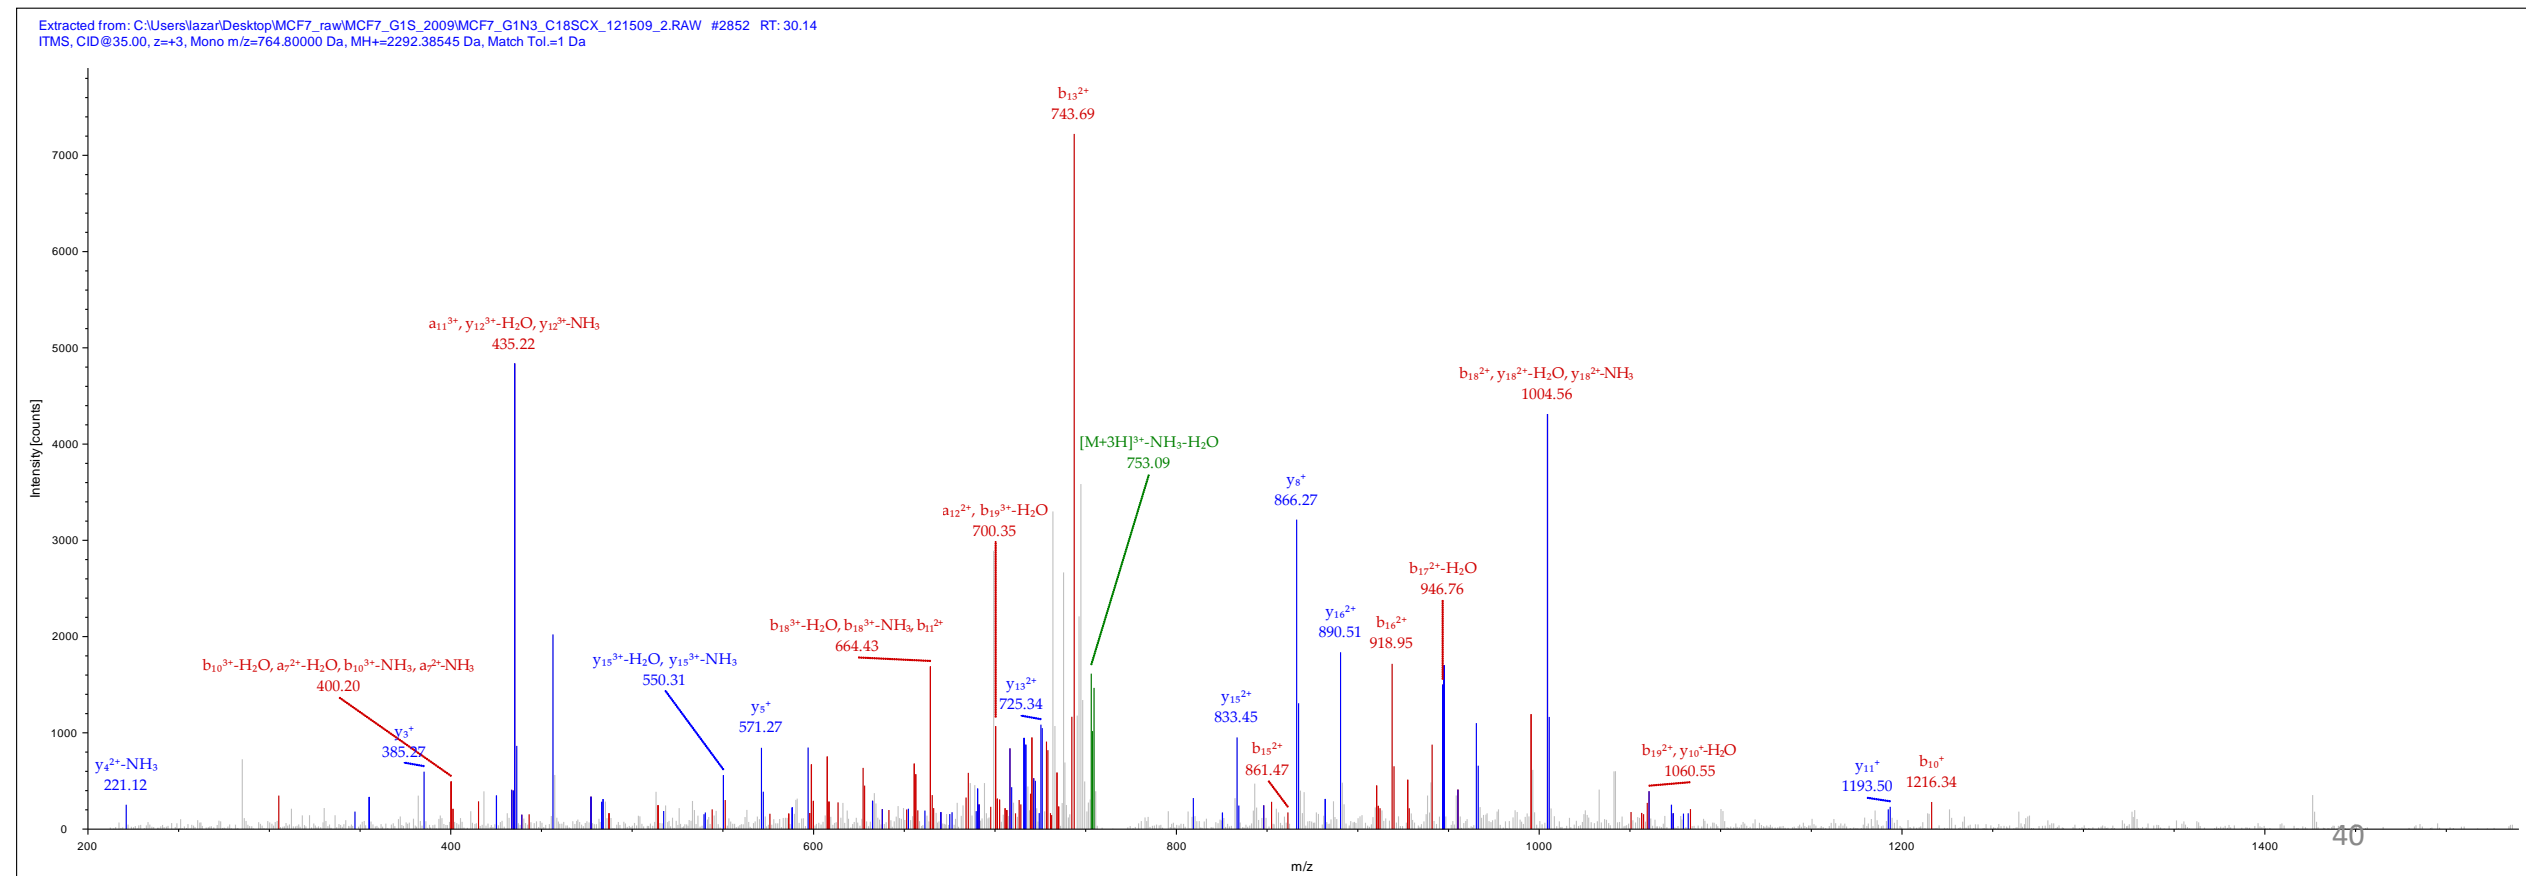



Sequence: MLVVL RQG TREEDV VSEDLVQQDVQDL YEAGELK, Charge: +3, Monoisotopic m/z: 1341.02000 Da (+684.96

mmu/+510.78 ppm), MH+: 4021.04545 Da, RT: 196.16 min

Identified with: Sequest HT (v1.3); XCorr:5.76

Fragment match tolerance used for search: 1 Da

Fragments used for search: a; a-H<sub>2</sub>O; a-NH<sub>3</sub>; b; b-H<sub>2</sub>O; b-NH<sub>3</sub>; y; y-H<sub>2</sub>O; y-NH<sub>3</sub>

**Protein references** (1): c.485T>G p.L162R|VVL RQGT|Missense|COSMIC|Liver(2) OR

co|ANXA6|c.641T>G|p.L214R|VVL RQGT|Missense|COSMIC|Liver(2) CANCER\_sp\_P08133,ANXA6\_HUMAN Annexin A6

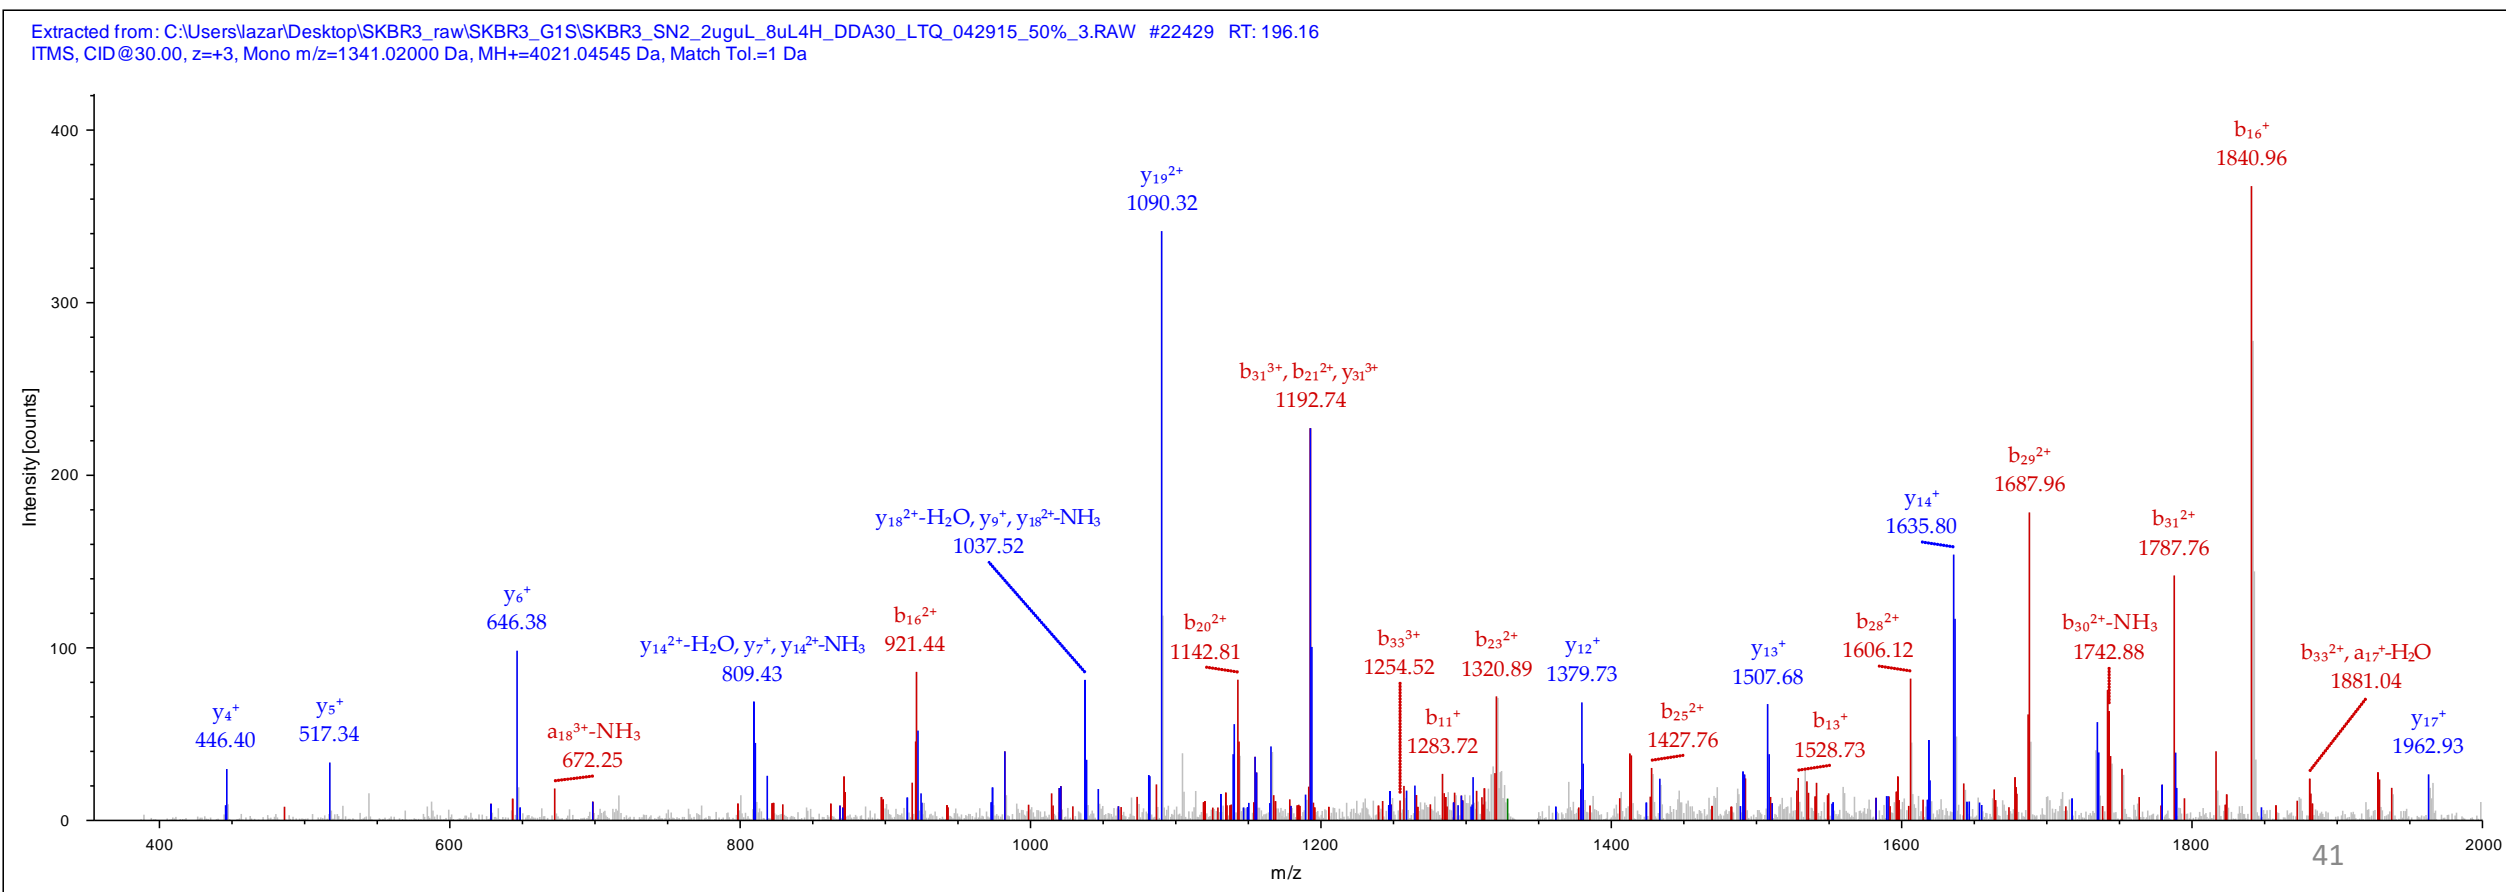

Sequence: QVHPDTGISSKVMGIMNSFVNDIFER, Charge: +3, Monoisotopic m/z: 974.24000 Da (-241.21 mmu/-247.59 ppm),

MH+: 2920.70545 Da, RT: 185.78 min

Identified with: Sequest HT (v1.3); XCorr:5.14

Fragment match tolerance used for search: 1 Da

Fragments used for search: a; a-H<sub>2</sub>O; a-NH<sub>3</sub>; b; b-H<sub>2</sub>O; b-NH<sub>3</sub>; y; y-H<sub>2</sub>O; y-NH<sub>3</sub>

**Protein references** (1): c.176C>T p.A59V|SSKVMGI|Missense|COSMIC|Endometrium(1) CANCER\_sp\_P23527,H2B10\_HUMAN

Histone H2B type 1-O

Extracted from: C:\Users\lazar\Desktop\SKBR3\_raw\SKBR3\_G1S\SKBR3\_SN1\_2uguL\_8uL4H\_DDA30\_LTQ\_042715\_70%\_7.RAW #21079 RT: 185.78  
ITMS, CID@30.00, z=+3, Mono m/z=974.24000 Da, MH+=2920.70545 Da, Match Tol.=1 Da

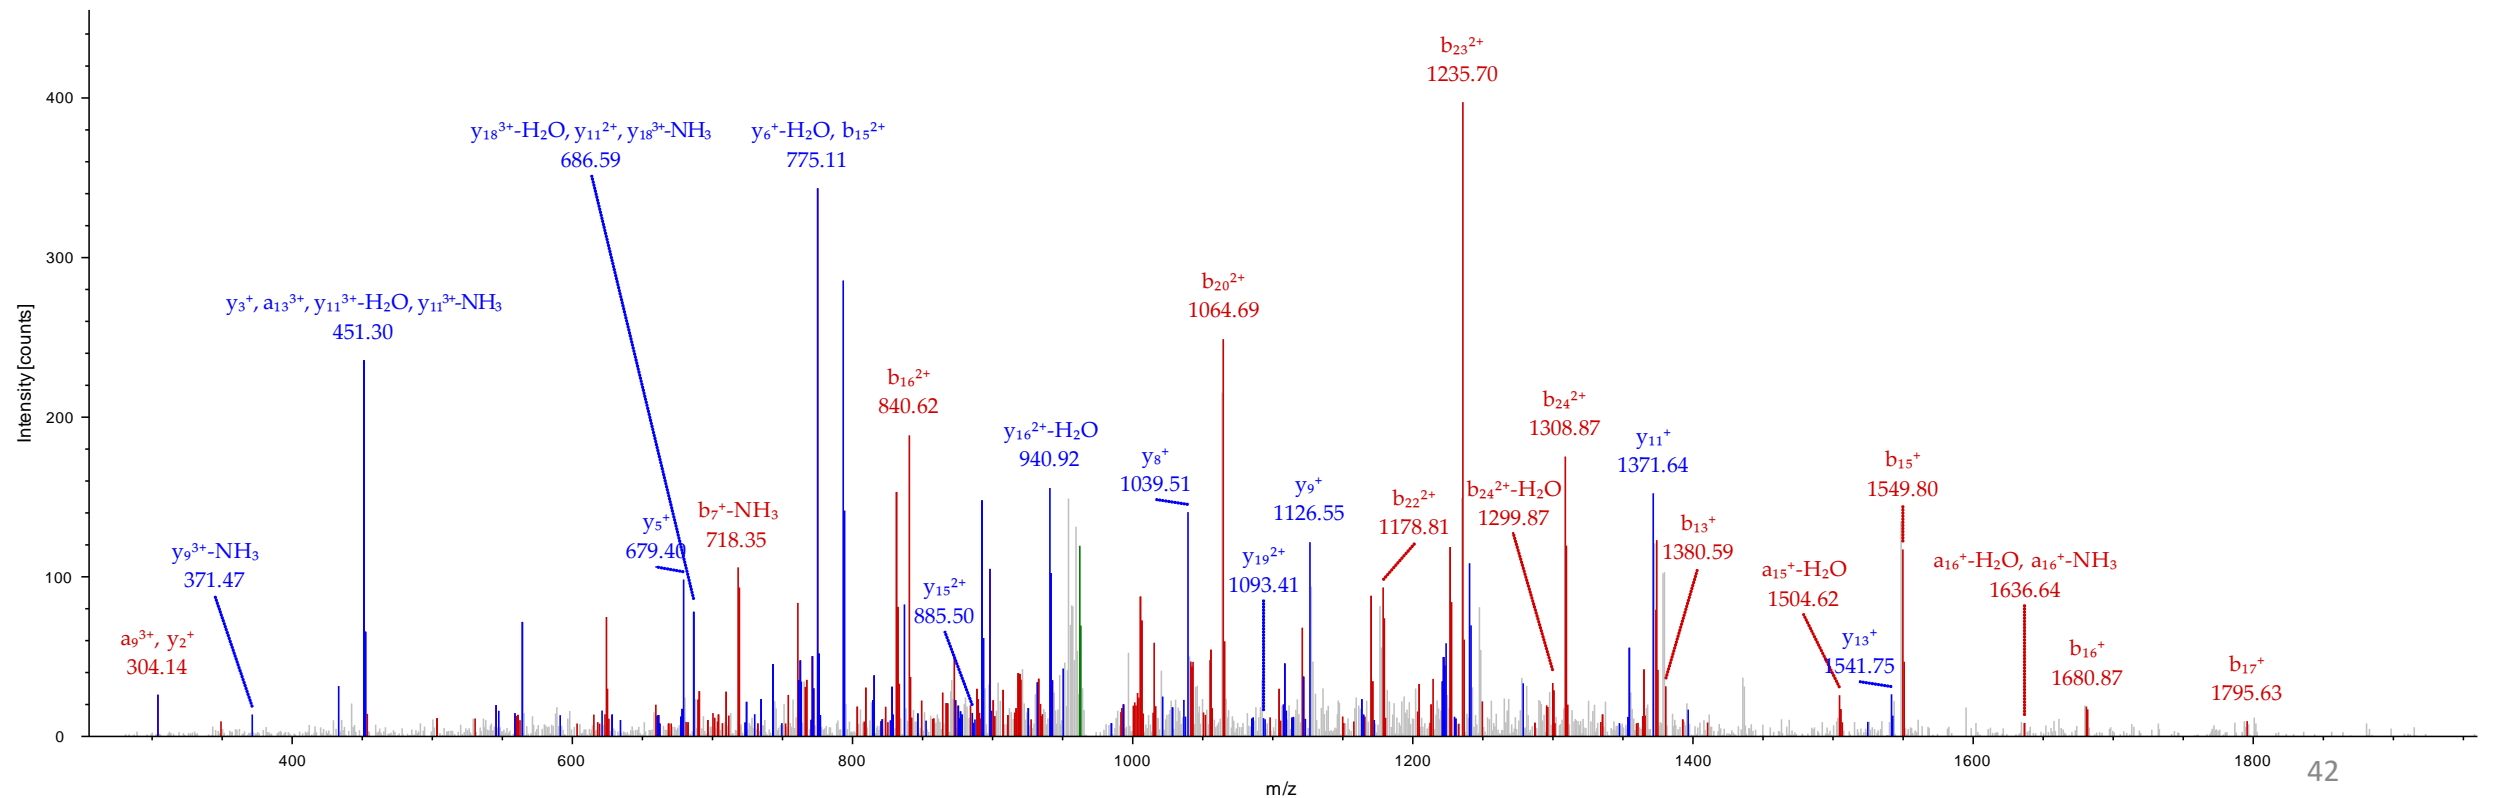

Sequence: QVYPDTGISSKAMGIMNSFVNDIFER, Charge: +3, Monoisotopic m/z: 974.28000 Da (+474.92 mmu/+487.45 ppm),

MH+: 2920.82545 Da, RT: 185.86 min

Identified with: Sequest HT (v1.3); XCorr:4.76

Fragment match tolerance used for search: 1 Da

Fragments used for search: a; a-H<sub>2</sub>O; a-NH<sub>3</sub>; b; b-H<sub>2</sub>O; b-NH<sub>3</sub>; y; y-H<sub>2</sub>O; y-NH<sub>3</sub>

**Protein references (1):** c.148C>T p.H50Y|KQVYPDT|Missense|COSMIC|Haematopoietic and lymphoid tissue(2) OR

sp|Q99879,H2B1M\_HUMAN Histone H2B type 1-M|c.148C>T|p.H50Y|KQVYPDT|Missense|COSMIC|NS(1)

CANCER\_sp\_O60814,H2B1K\_HUMAN Histone H2B type 1-K

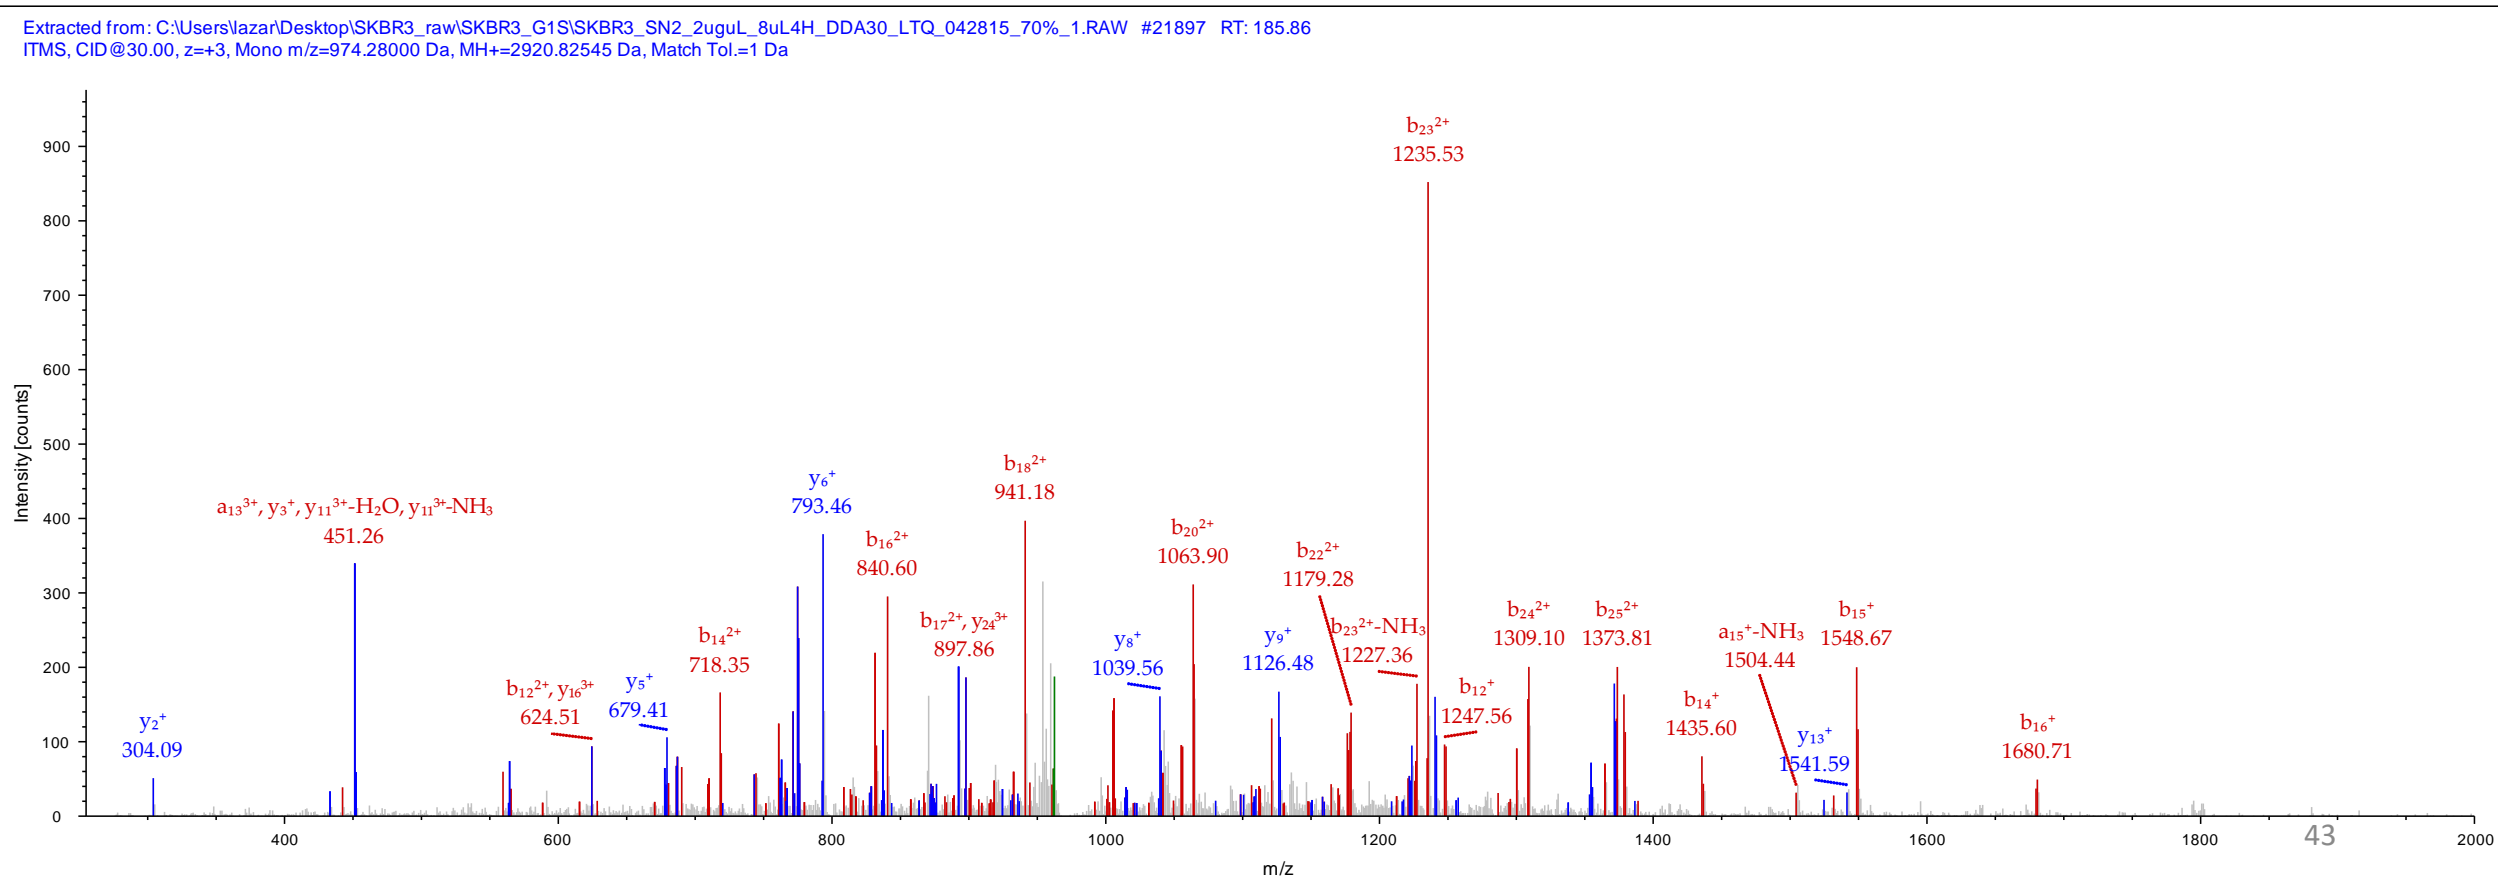

Sequence: SDASSGQSGRSASRTTR, Charge: +2, Monoisotopic m/z: 899.18000 Da (-245.52 mmu/-273.04 ppm), MH+: 1797.35272 Da, RT: 58.40 min

Identified with: Sequest HT (v1.3); XCorr:4.03

Fragment match tolerance used for search: 1 Da

Fragments used for search: a; a-H<sub>2</sub>O; a-NH<sub>3</sub>; b; b-H<sub>2</sub>O; b-NH<sub>3</sub>; y; y-H<sub>2</sub>O; y-NH<sub>3</sub>

**Protein references** (2): c.2650C>A p.R884S|DASSGQS|Missense|COSMIC|Lung(1) CANCER\_sp\_P20930,FILA\_HUMAN Filaggrin

Extracted from: C:\Users\lazar\Desktop\SKBR3\_raw\SKBR3\_G1S\SKBR3\_SN1\_2uguL\_8uL4H\_DDA30\_LTQ\_042215\_70%\_1.RAW #6075 RT: 58.40  
ITMS, CID@30.00, z=+2, Mono m/z=899.18000 Da, MH+=1797.35272 Da, Match Tol.=1 Da

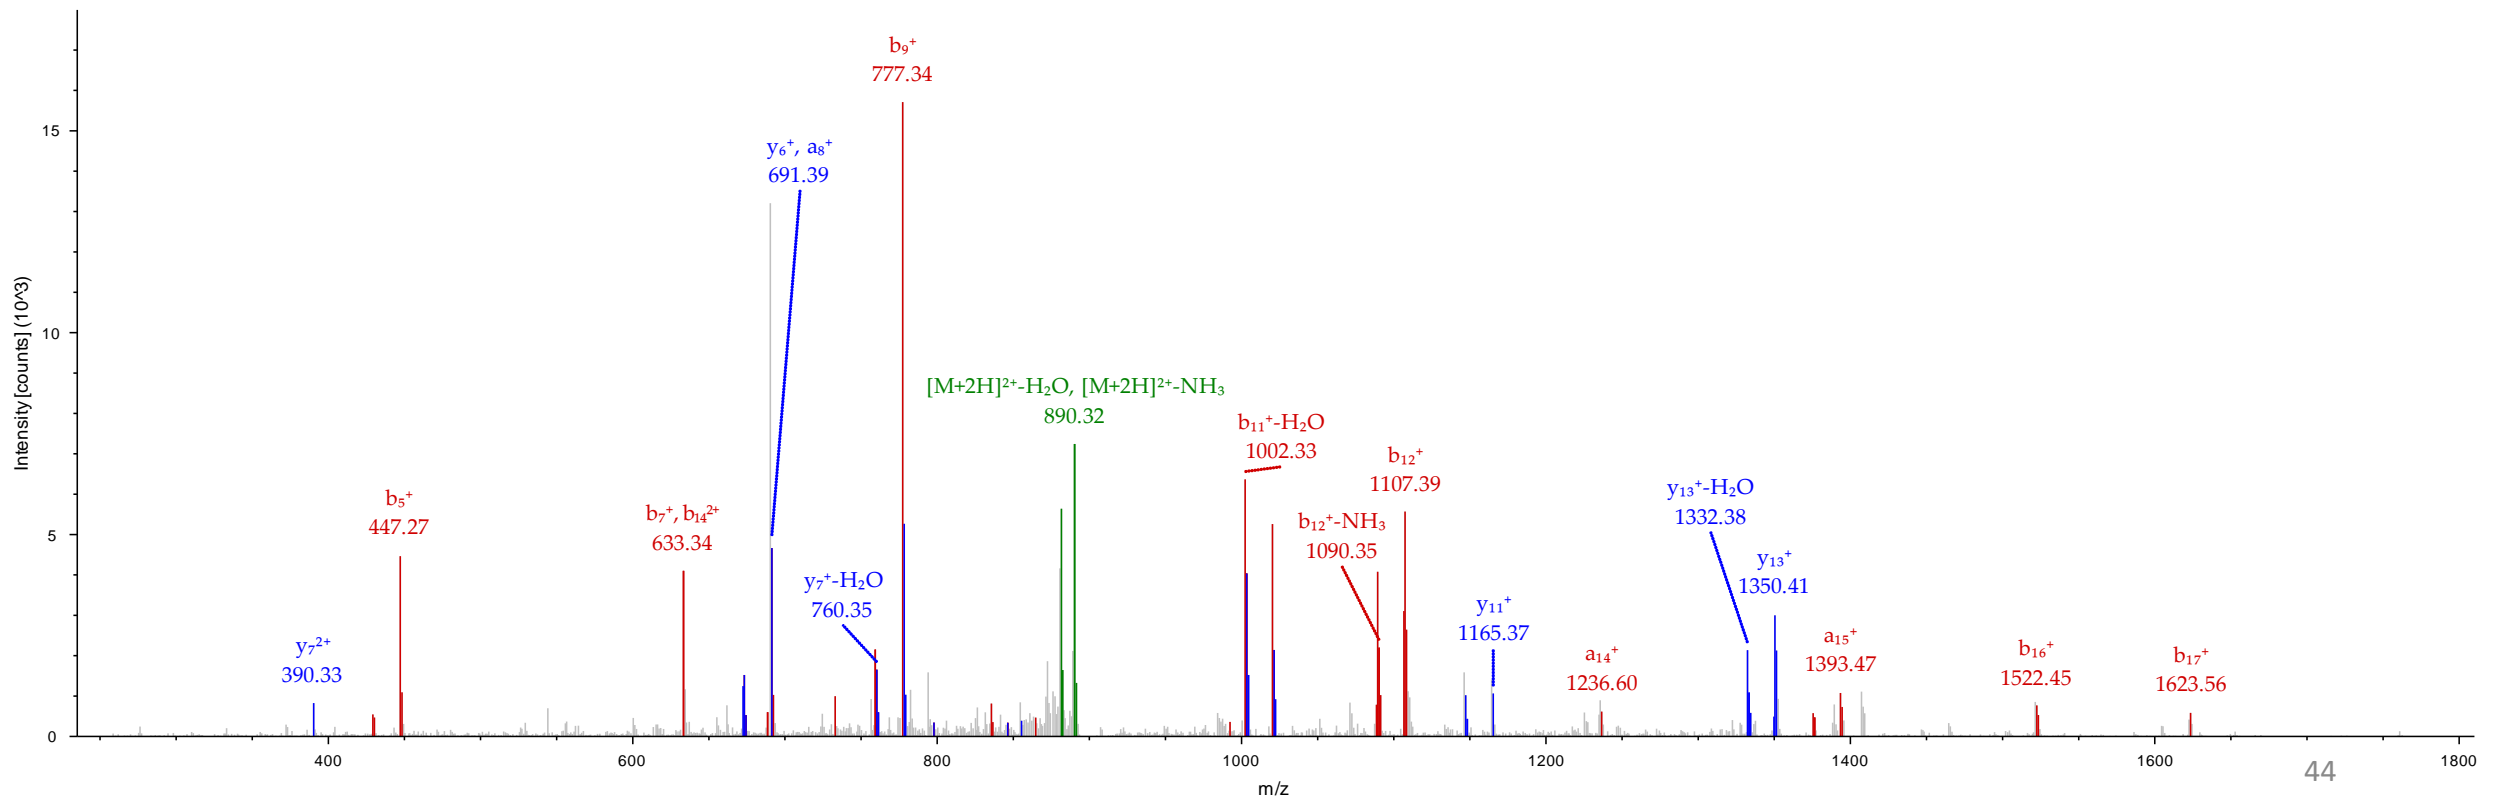

Sequence: SLGQNPTEAELQDMINEVDADGNGTIDFPEFFTMAR, Charge: +3, Monoisotopic m/z: 1368.98000 Da (+365.01 mmu/+266.63 ppm), MH+: 4104.92545 Da, RT: 158.43 min

Identified with: Sequest HT (v1.3); XCorr:5.17

Fragment match tolerance used for search: 1 Da

Fragments used for search: a; a-H<sub>2</sub>O; a-NH<sub>3</sub>; b; b-H<sub>2</sub>O; b-NH<sub>3</sub>; y; y-H<sub>2</sub>O; y-NH<sub>3</sub>

**Protein references** (1): c.210G>T p.L70F|PEFFTM|Missense|COSMIC|Oesophagus(1);Lung(1)

CANCER\_sp\_P62158,CALM\_HUMAN Calmodulin

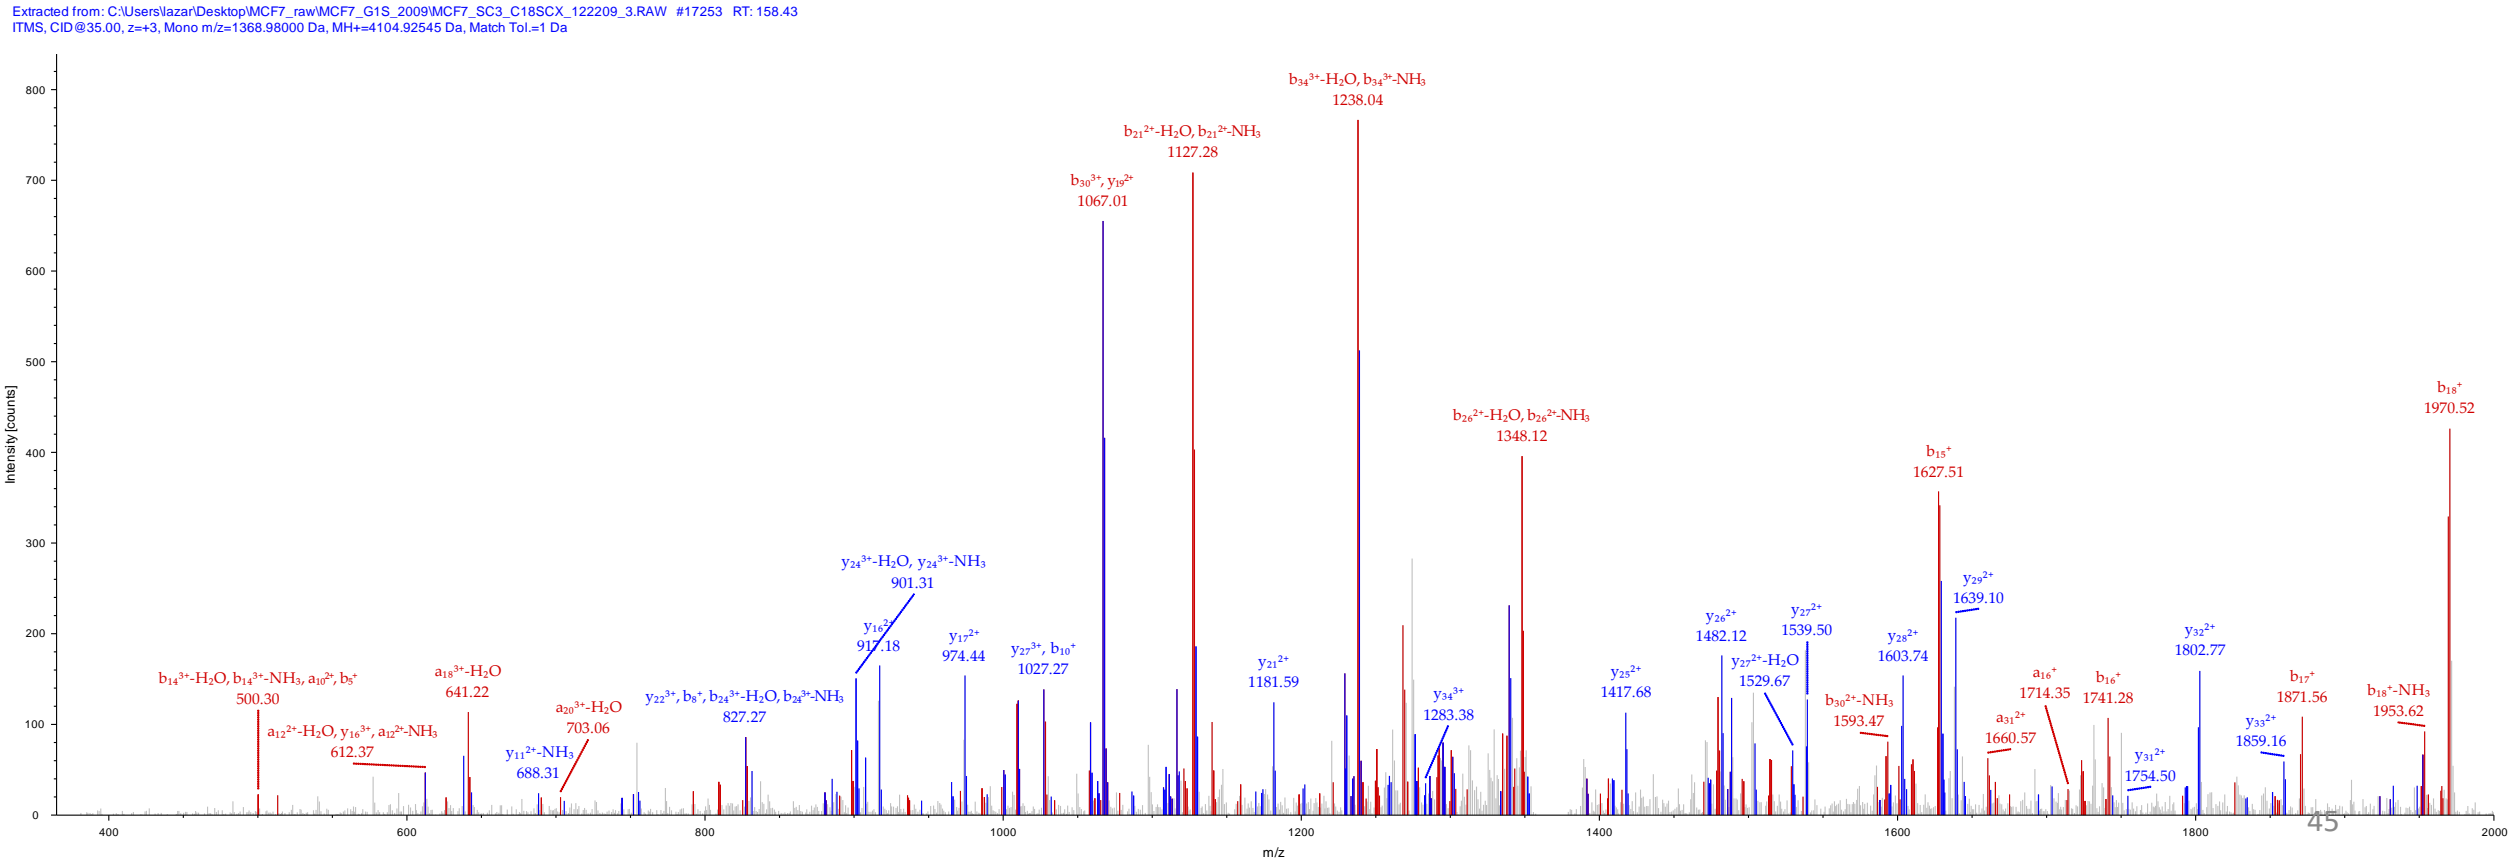

Sequence: SMGIMNSFVNDIFER, Charge: +2, Monoisotopic m/z: 881.74000 Da (+1329.97 mmu/+1508.35 ppm), MH+:  
1762.47272 Da, RT: 126.38 min

Identified with: Sequest HT (v1.3); XCorr:4.19

Fragment match tolerance used for search: 1 Da

Fragments used for search: a; a-H<sub>2</sub>O; a-NH<sub>3</sub>; b; b-H<sub>2</sub>O; b-NH<sub>3</sub>; y; y-H<sub>2</sub>O; y-NH<sub>3</sub>

**Protein references (1):** c.175G>T p.A59S|SSKSMGI|Missense|COSMIC|Lung(1) CANCER\_sp\_Q8N257,H2B3B\_HUMAN Histone H2B type 3-B

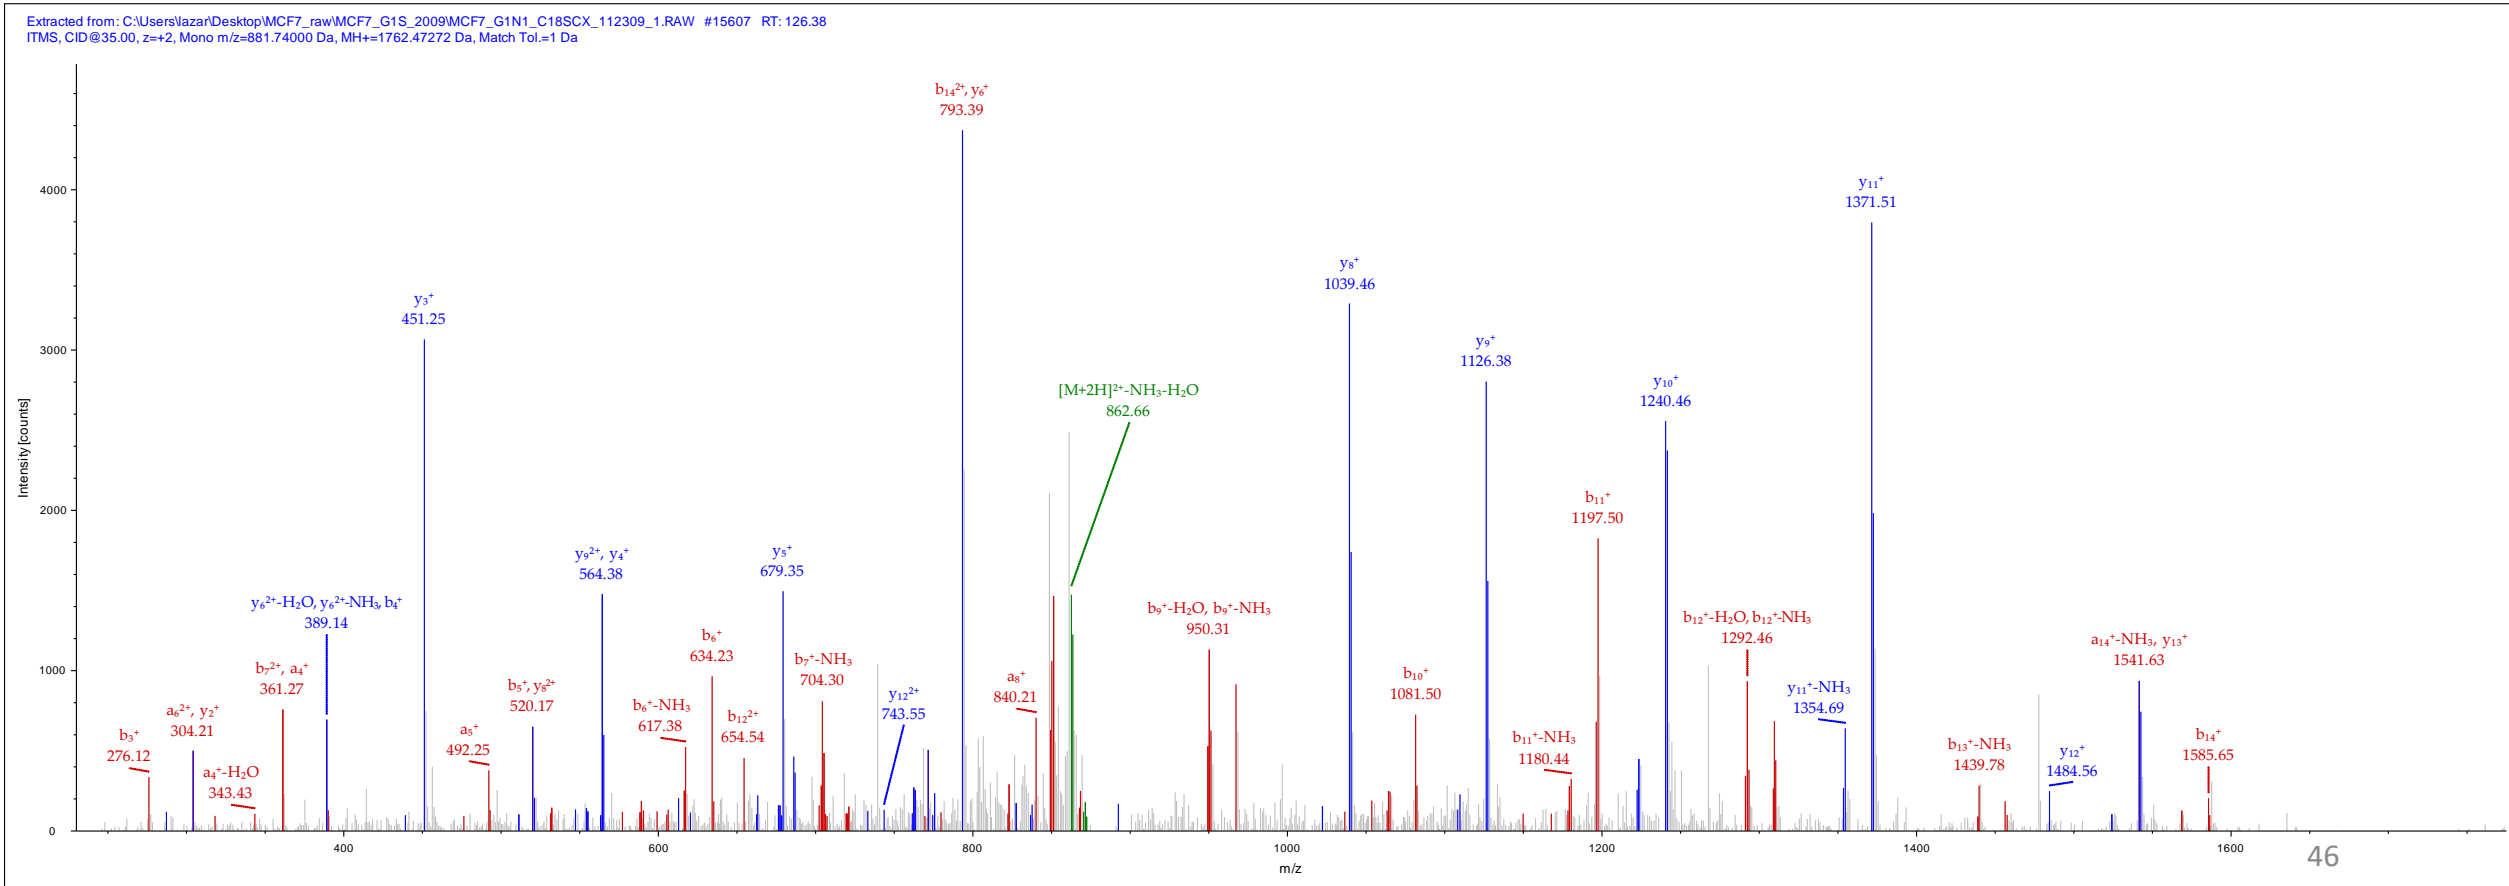

Sequence: SVIVLRLNVDLQAVVIFELVY, Charge: +2, Monoisotopic m/z: 1251.38000 Da (+139.28 mmu/+111.3 ppm), MH+: 2501.75272 Da, RT: 181.32 min

Identified with: Sequest HT (v1.3); XCorr:3.61

Fragment match tolerance used for search: 1 Da

Fragments used for search: a; a-H<sub>2</sub>O; a-NH<sub>3</sub>; b; b-H<sub>2</sub>O; b-NH<sub>3</sub>; y; y-H<sub>2</sub>O; y-NH<sub>3</sub>

**Protein references** (1): c.1157delA p.K388fs\*39|MQKNLRNQSVMADWREMKSIVIVLRLNVDLQAVVIFELVY|Deletion - frameshift|COSMIC|Large intestine(4) CANCER\_sp\_Q8TC27,ADA32\_HUMAN Disintegrin and metalloproteinase domain-containing protein 32

Extracted from: C:\Users\lazar\Desktop\MCF7\_raw\MCF7\_G1S\_2009\MCF7\_SC1\_C18SCX\_120509\_5.RAW #21072 RT: 181.32  
ITMS, CID@35.00, z=+2, Mono m/z=1251.38000 Da, MH+=2501.75272 Da, Match Tol.=1 Da

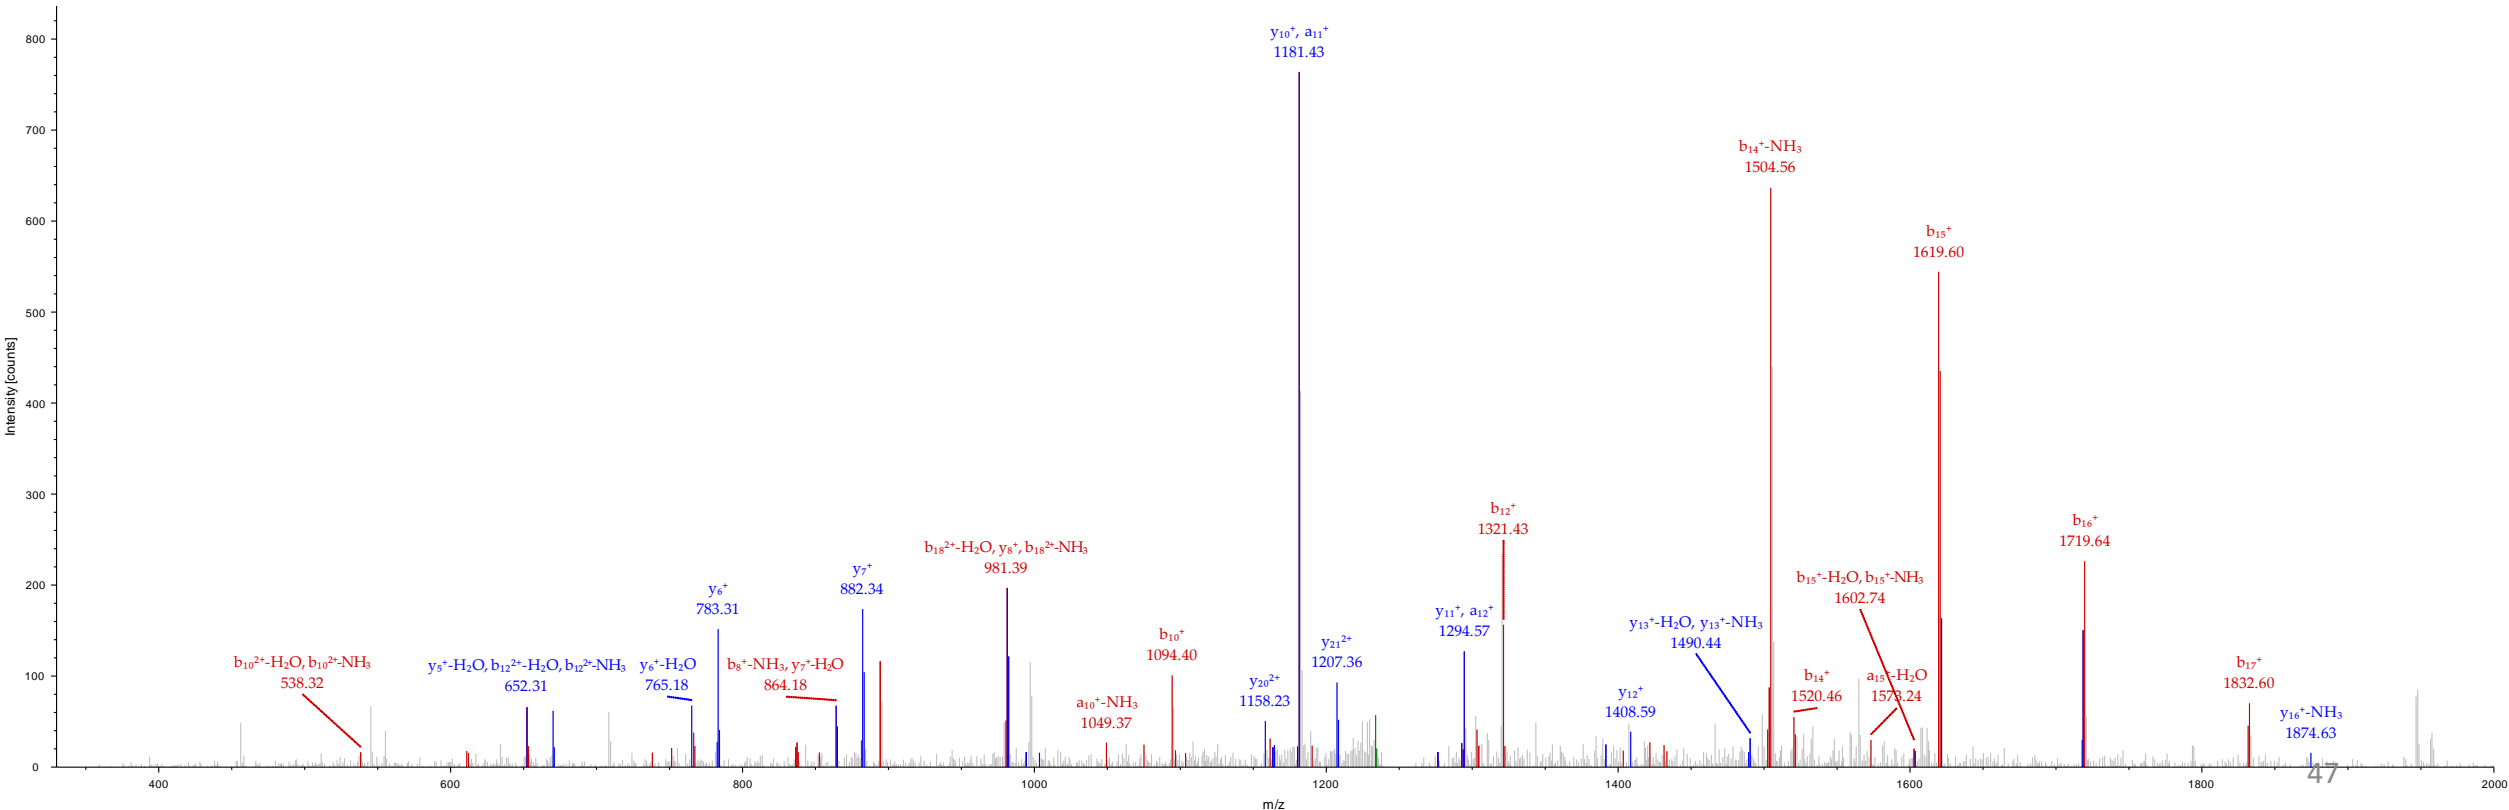

Sequence: SYELPDGQVITIGKER, Charge: +2, Monoisotopic m/z: 903.38000 Da (+404.57 mmu/+447.84 ppm), MH+: 1805.75272 Da, RT: 73.80 min

Identified with: Sequest HT (v1.3); XCorr:4.02

Fragment match tolerance used for search: 1 Da

Fragments used for search: a; a-H<sub>2</sub>O; a-NH<sub>3</sub>; b; b-H<sub>2</sub>O; b-NH<sub>3</sub>; y; y-H<sub>2</sub>O; y-NH<sub>3</sub>

**Protein references** (1): c.762C>A p.N254K|TIGKERF|Missense|COSMIC|Breast(1) CANCER\_sp\_P68133,ACTS\_HUMAN Actin, alpha skeletal muscle

Extracted from: C:\Users\lazar\Desktop\MCF10\_raw\MCF10\_Raw\_2011\MCF10\_SN3\_C18SCX\_092211\_1.RAW #8961 RT: 73.80  
ITMS, CID@35.00, z=+2, Mono m/z=903.38000 Da, MH+=1805.75272 Da, Match Tol.=1 Da

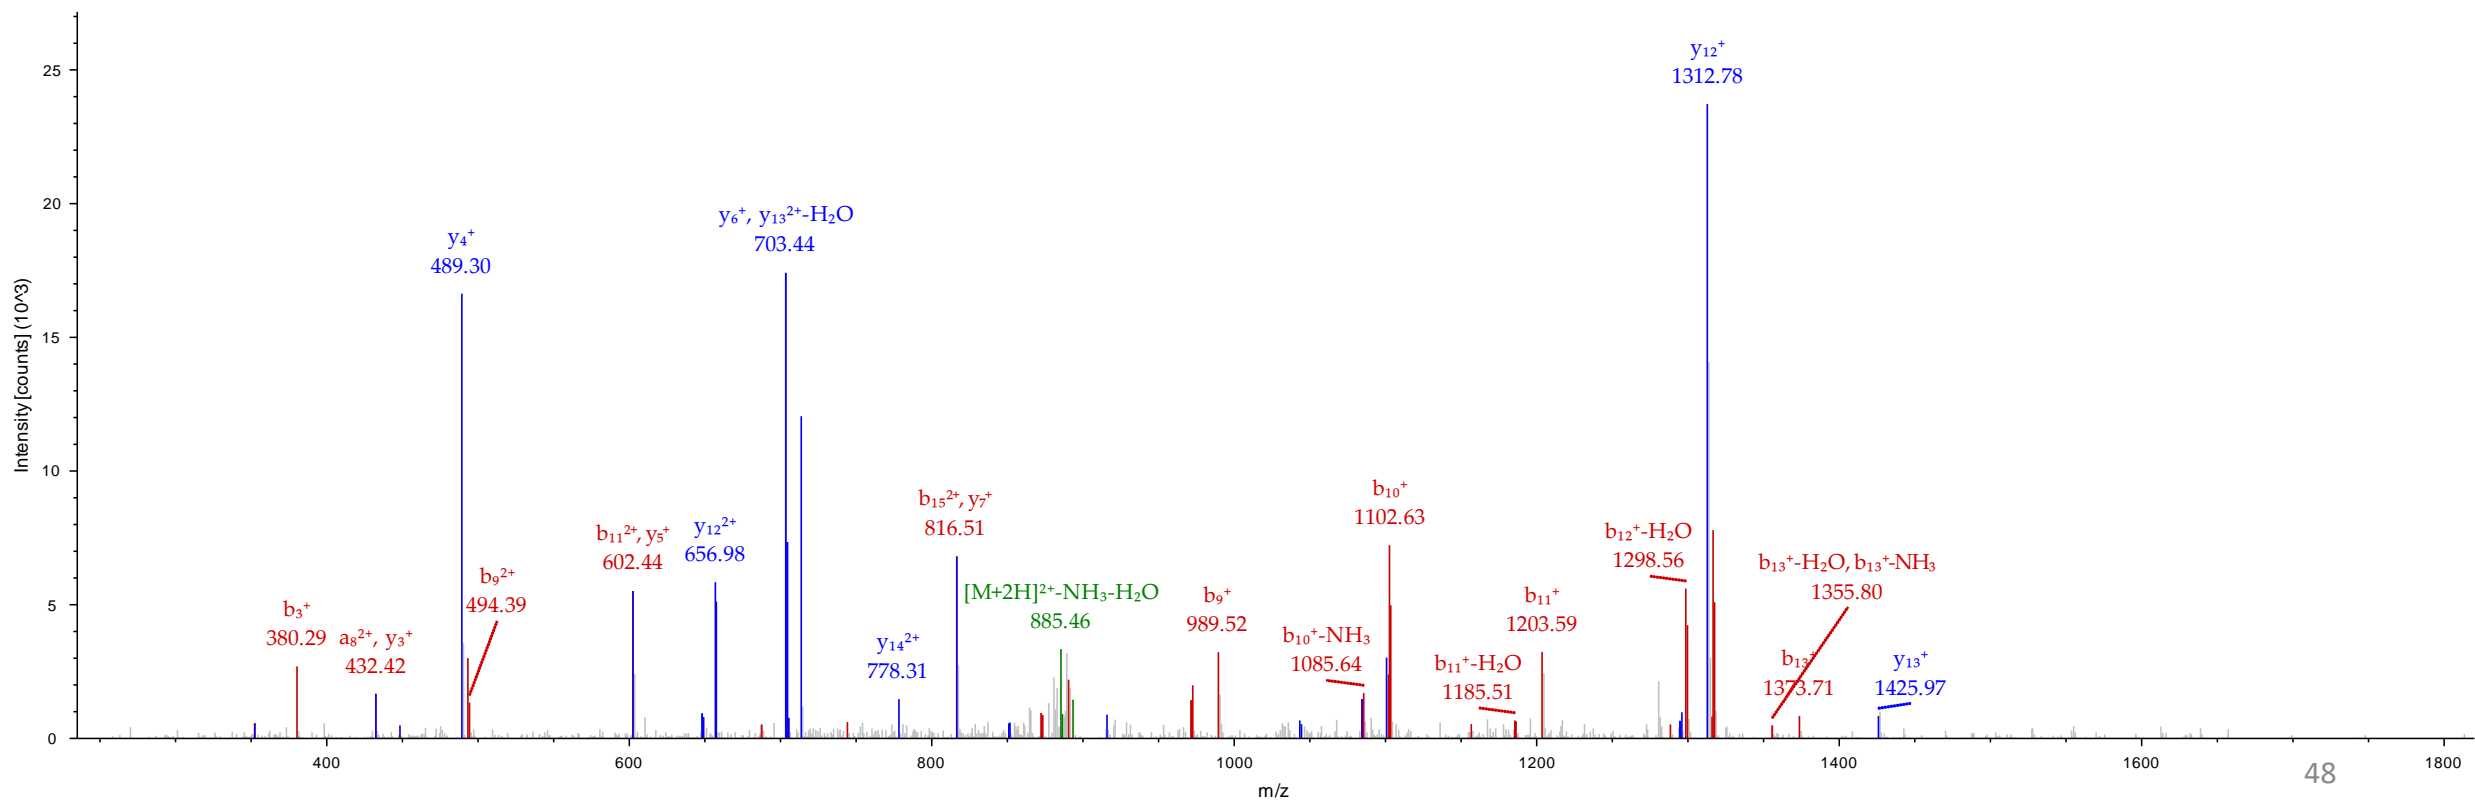



Sequence: TSPDPLPVSAAPSKAGLPR, Charge: +2, Monoisotopic m/z: 932.74000 Da (+1728.35 mmu/+1852.98 ppm), MH+: 1864.47272 Da, RT: 93.95 min

Identified with: Sequest HT (v1.3); XCorr:3.72

Fragment match tolerance used for search: 1 Da

Fragments used for search: a; a-H<sub>2</sub>O; a-NH<sub>3</sub>; b; b-H<sub>2</sub>O; b-NH<sub>3</sub>; y; y-H<sub>2</sub>O; y-NH<sub>3</sub>

**Protein references** (1): c.989C>T p.S330L | PDPLPVS | Missense | COSMIC | Skin(1) CANCER\_sp\_Q13469,NFAC2\_HUMAN Nuclear factor of activated T-cells, cytoplasmic 2

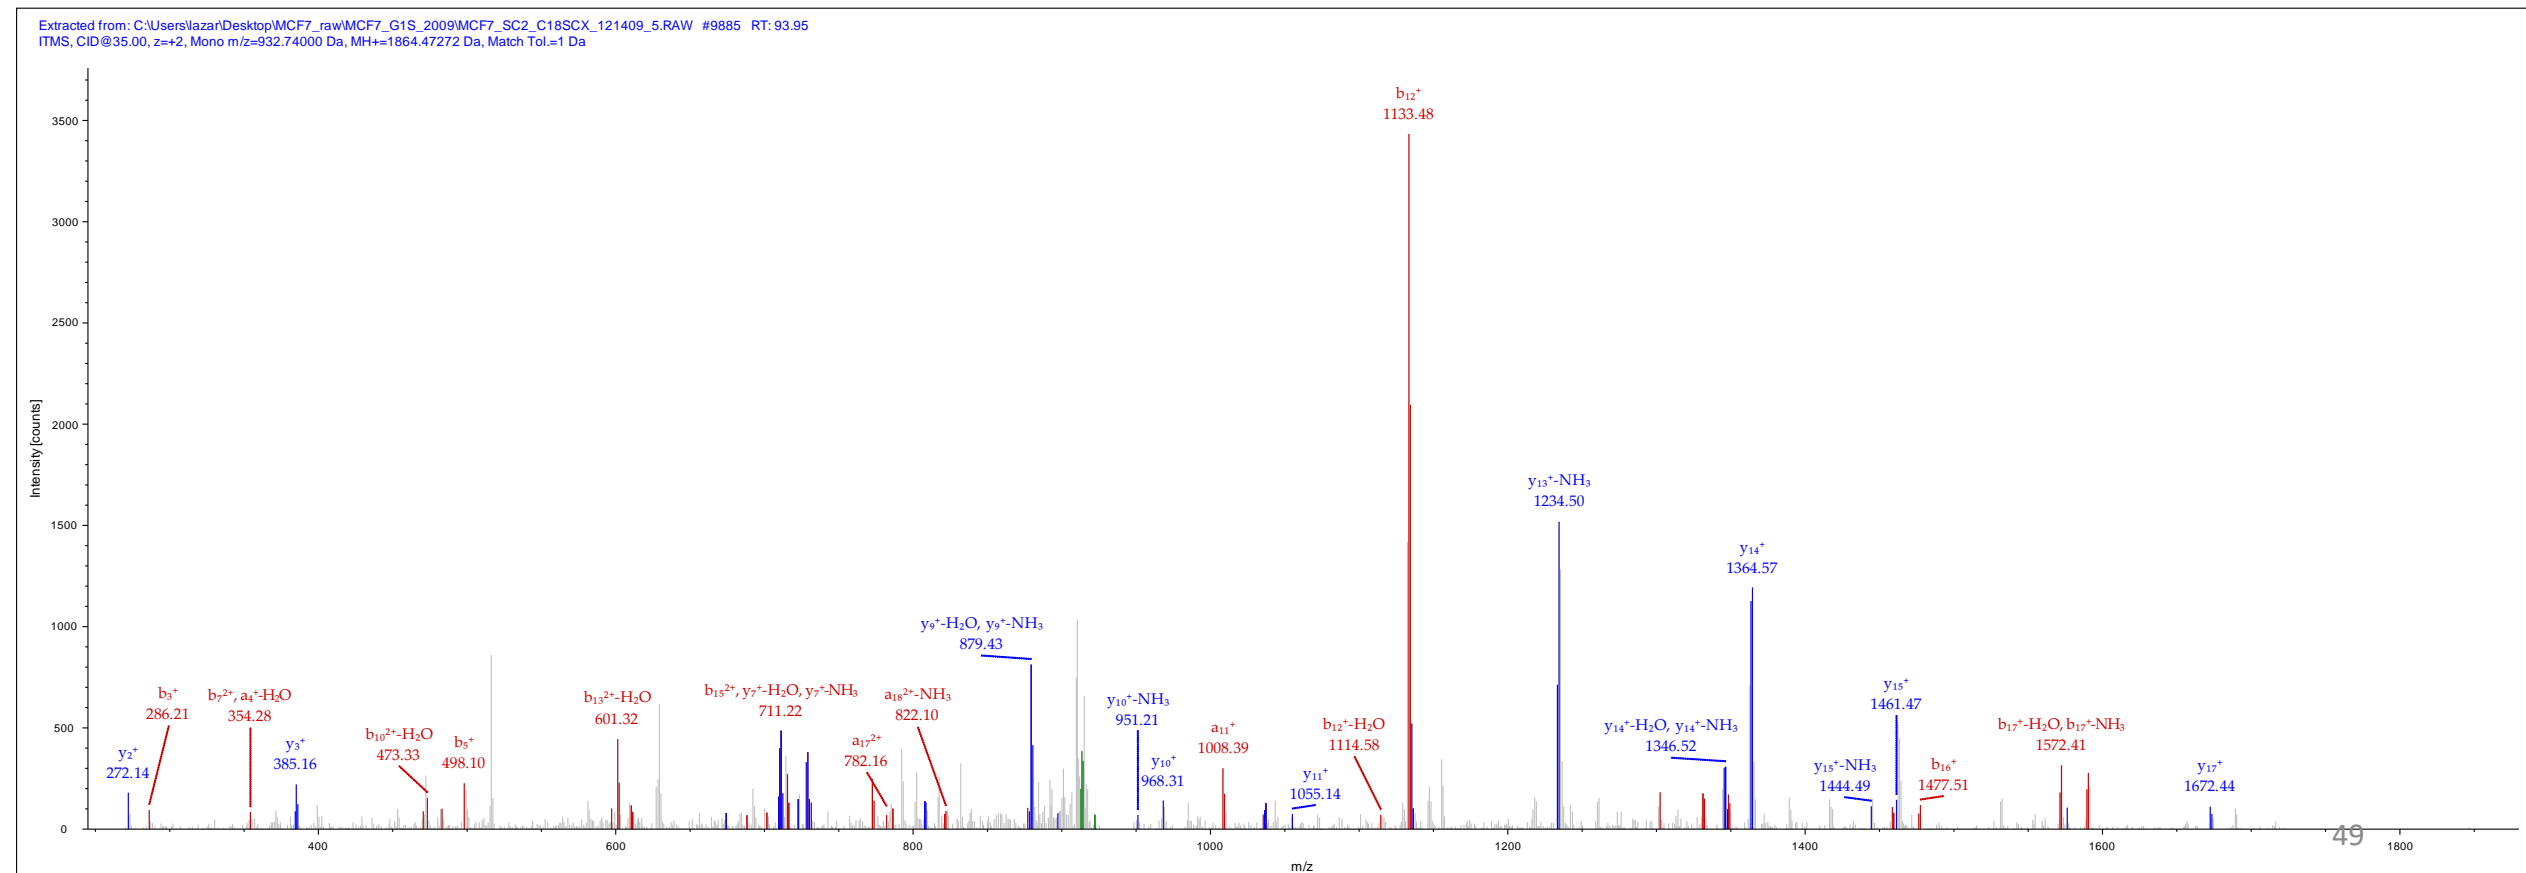

Sequence: TTGIVMDSGDGVTHTVPIYEAYALPHAILR, Charge: +3, Monoisotopic m/z: 1067.04000 Da (+492.09 mmu/+461.18 ppm), MH+: 3199.10545 Da, RT: 104.38 min

Identified with: Sequest HT (v1.3); XCorr:5.94

Fragment match tolerance used for search: 1 Da

Fragments used for search: a; a-H<sub>2</sub>O; b; b-H<sub>2</sub>O; y; y-H<sub>2</sub>O; y-NH<sub>3</sub>

Protein references (1): c.503G>C p.G168A|IYEAYAL|Missense|COSMIC|Endometrium(1) CANCER\_sp\_P63261,ACTG\_HUMAN Actin, cytoplasmic 2

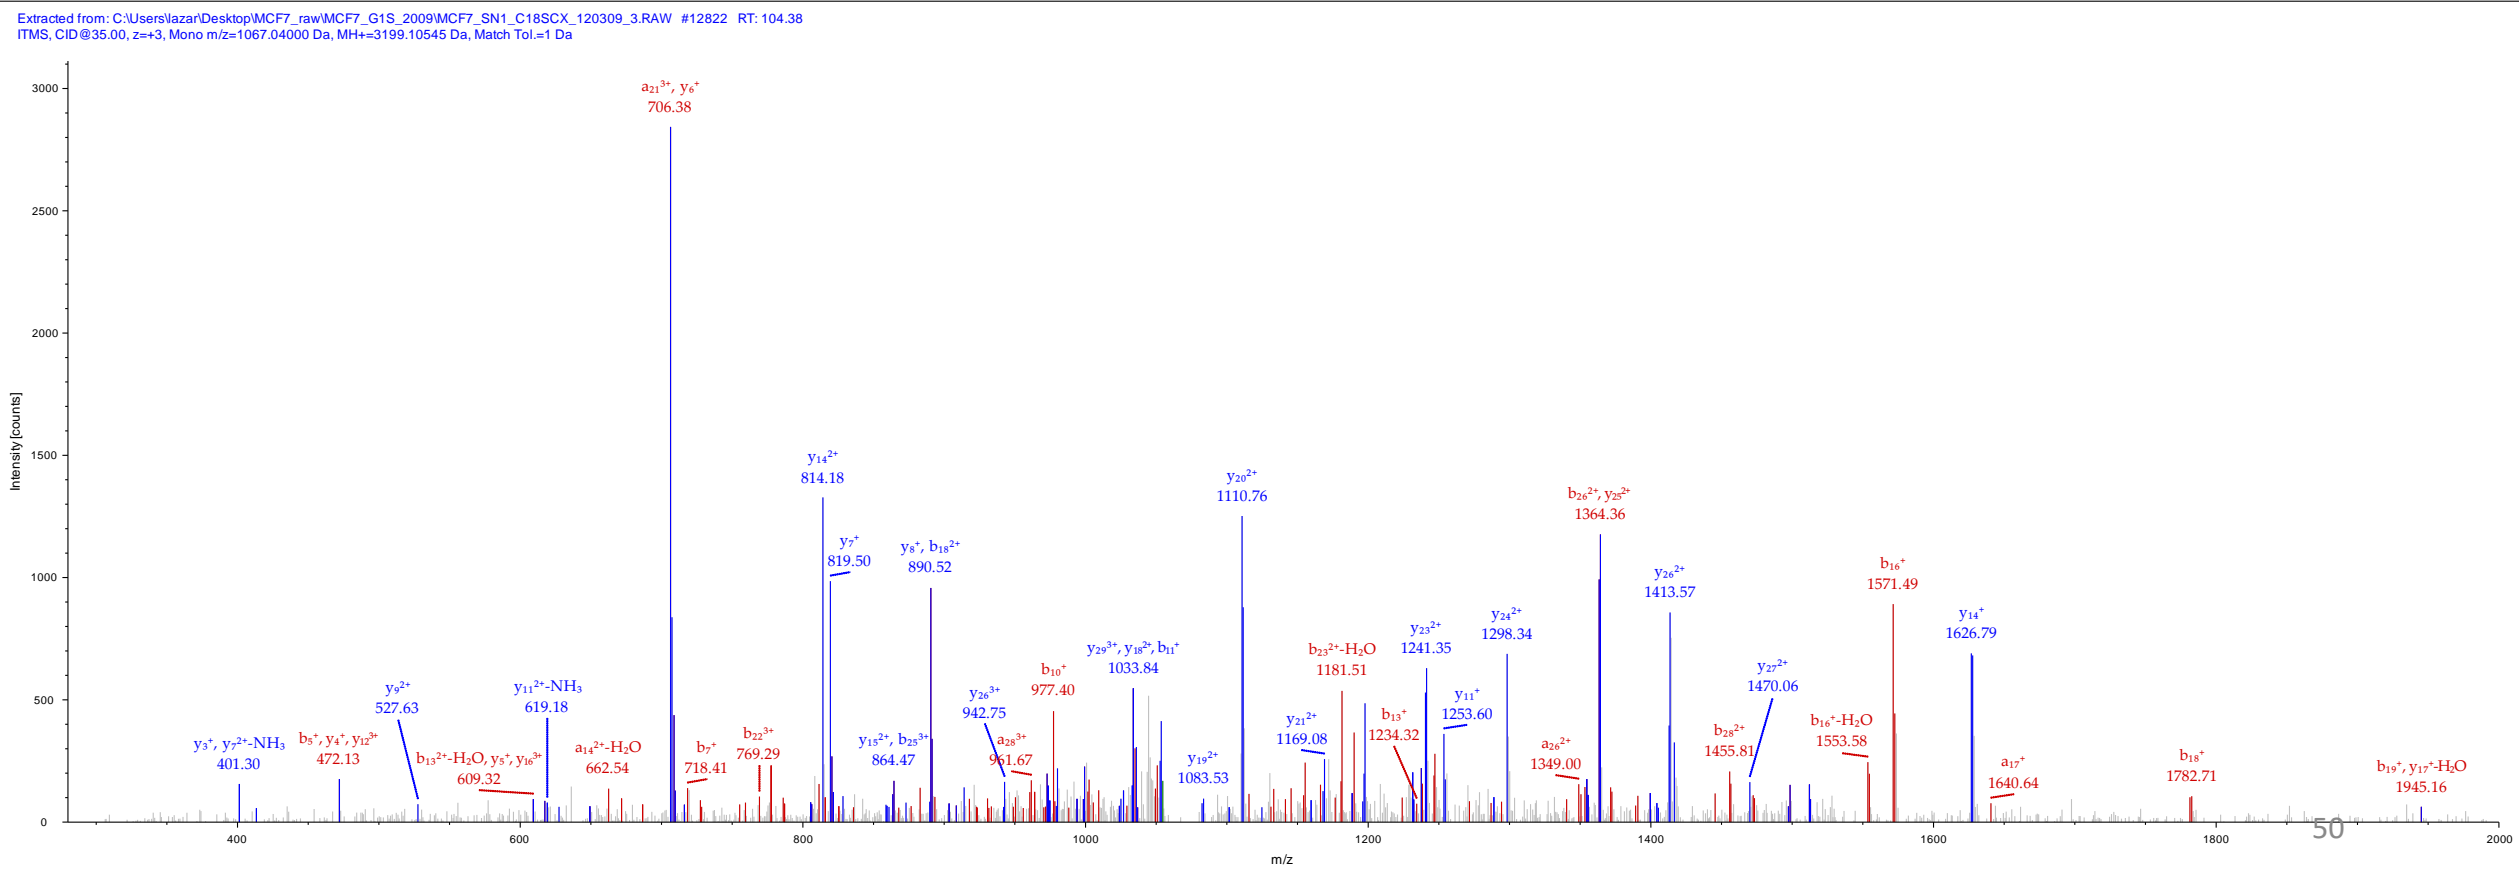

Sequence: TVSLGAGSKDELHIVEAEAMNYEGSPIK, Charge: +3, Monoisotopic m/z: 982.40000 Da (-90.32 mmu/-91.94 ppm),

MH+: 2945.18545 Da, RT: 119.62 min,

Identified with: Sequest HT (v1.3); XCorr:4.82

Fragment match tolerance used for search: 1 Da

Fragments used for search: a; a-H<sub>2</sub>O; a-NH<sub>3</sub>; b; b-H<sub>2</sub>O; b-NH<sub>3</sub>; y; y-H<sub>2</sub>O; y-NH<sub>3</sub>

**Protein references** (1): c.157G>T p.A53S|GAGSKDE|Missense|COSMIC|Lung(1) OR sp|P06748,NPM\_HUMAN

Nucleophosmin|c.157G>T|p.A53S|GAGSKDE|Missense|COSMIC|Lung(1) CANCER\_sp\_P06748-3,NPM\_HUMAN Isoform 3 of Nucleophosmin

Extracted from: C:\Users\lazar\Desktop\SKBR3\_raw\SKBR3\_G1S\SKBR3\_G1N2\_zuguL\_8uL4H\_DDA30\_LTQ\_093015\_1.RAW #15042 RT: 119.62  
ITMS, CID@30.00, z=+3, Mono m/z=982.40000 Da, MH+=2945.18545 Da, Match Tol.=1 Da

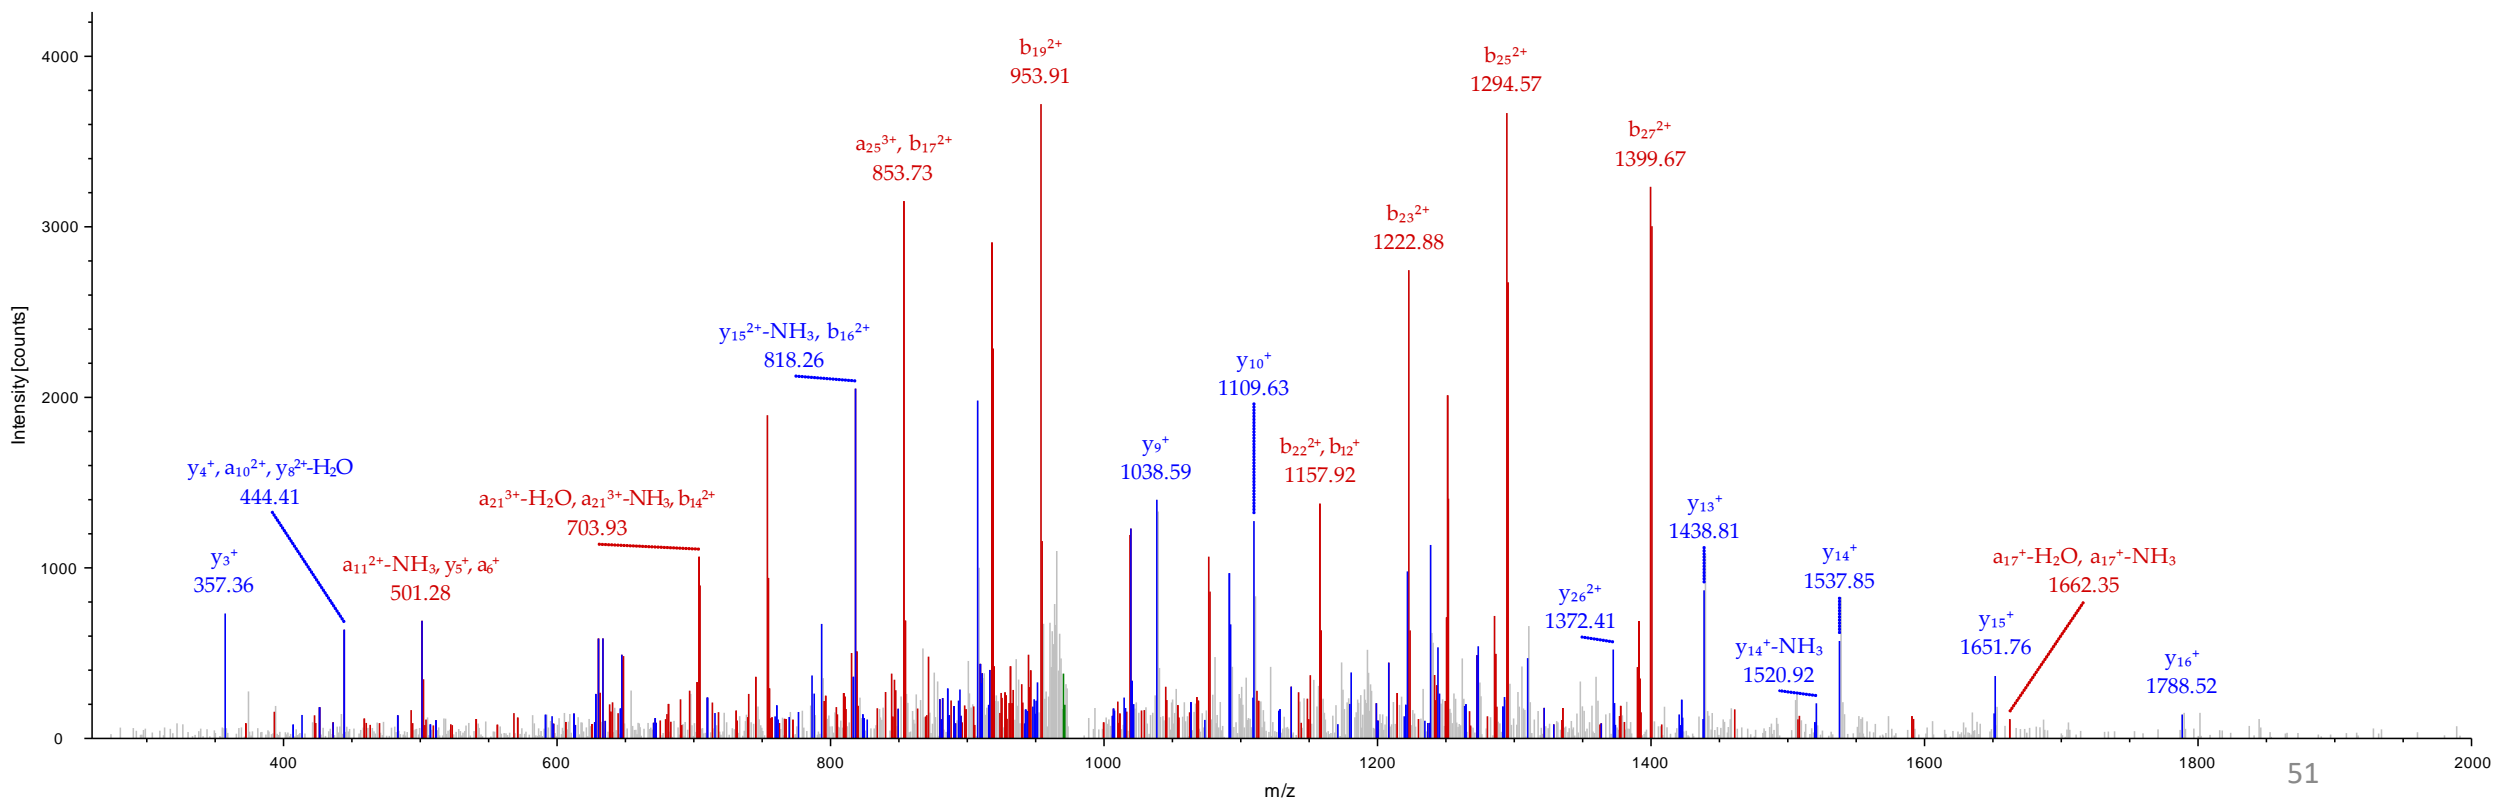

Sequence: VSELEEFINGPNNNAHIQQVGDR, Charge: +3, Monoisotopic m/z: 822.34000 Da (-398.81 mmu/-484.97 ppm), MH+: 2465.00545 Da, RT: 72.83 min

Identified with: Sequest HT (v1.3); XCorr:4.03

Fragment match tolerance used for search: 1 Da

Fragments used for search: a; a-H<sub>2</sub>O; a-NH<sub>3</sub>; b; b-H<sub>2</sub>O; b-NH<sub>3</sub>; y; y-H<sub>2</sub>O; y-NH<sub>3</sub>

**Protein references (1):** c.3564T>G p.D1188E | ELEEFIN | Missense | COSMIC | Endometrium(1) CANCER\_sp\_P53675, CLH2\_HUMAN Clathrin heavy chain 2

Extracted from: C:\Users\lazar\Desktop\MCF10\_raw\MCF10\_Raw\_2011\MCF10\_SC3\_C18SCX\_092111\_3.RAW #8037 RT: 72.83  
ITMS, CID@35.00, z=+3, Mono m/z=822.34000 Da, MH+=2465.00545 Da, Match Tol.=1 Da

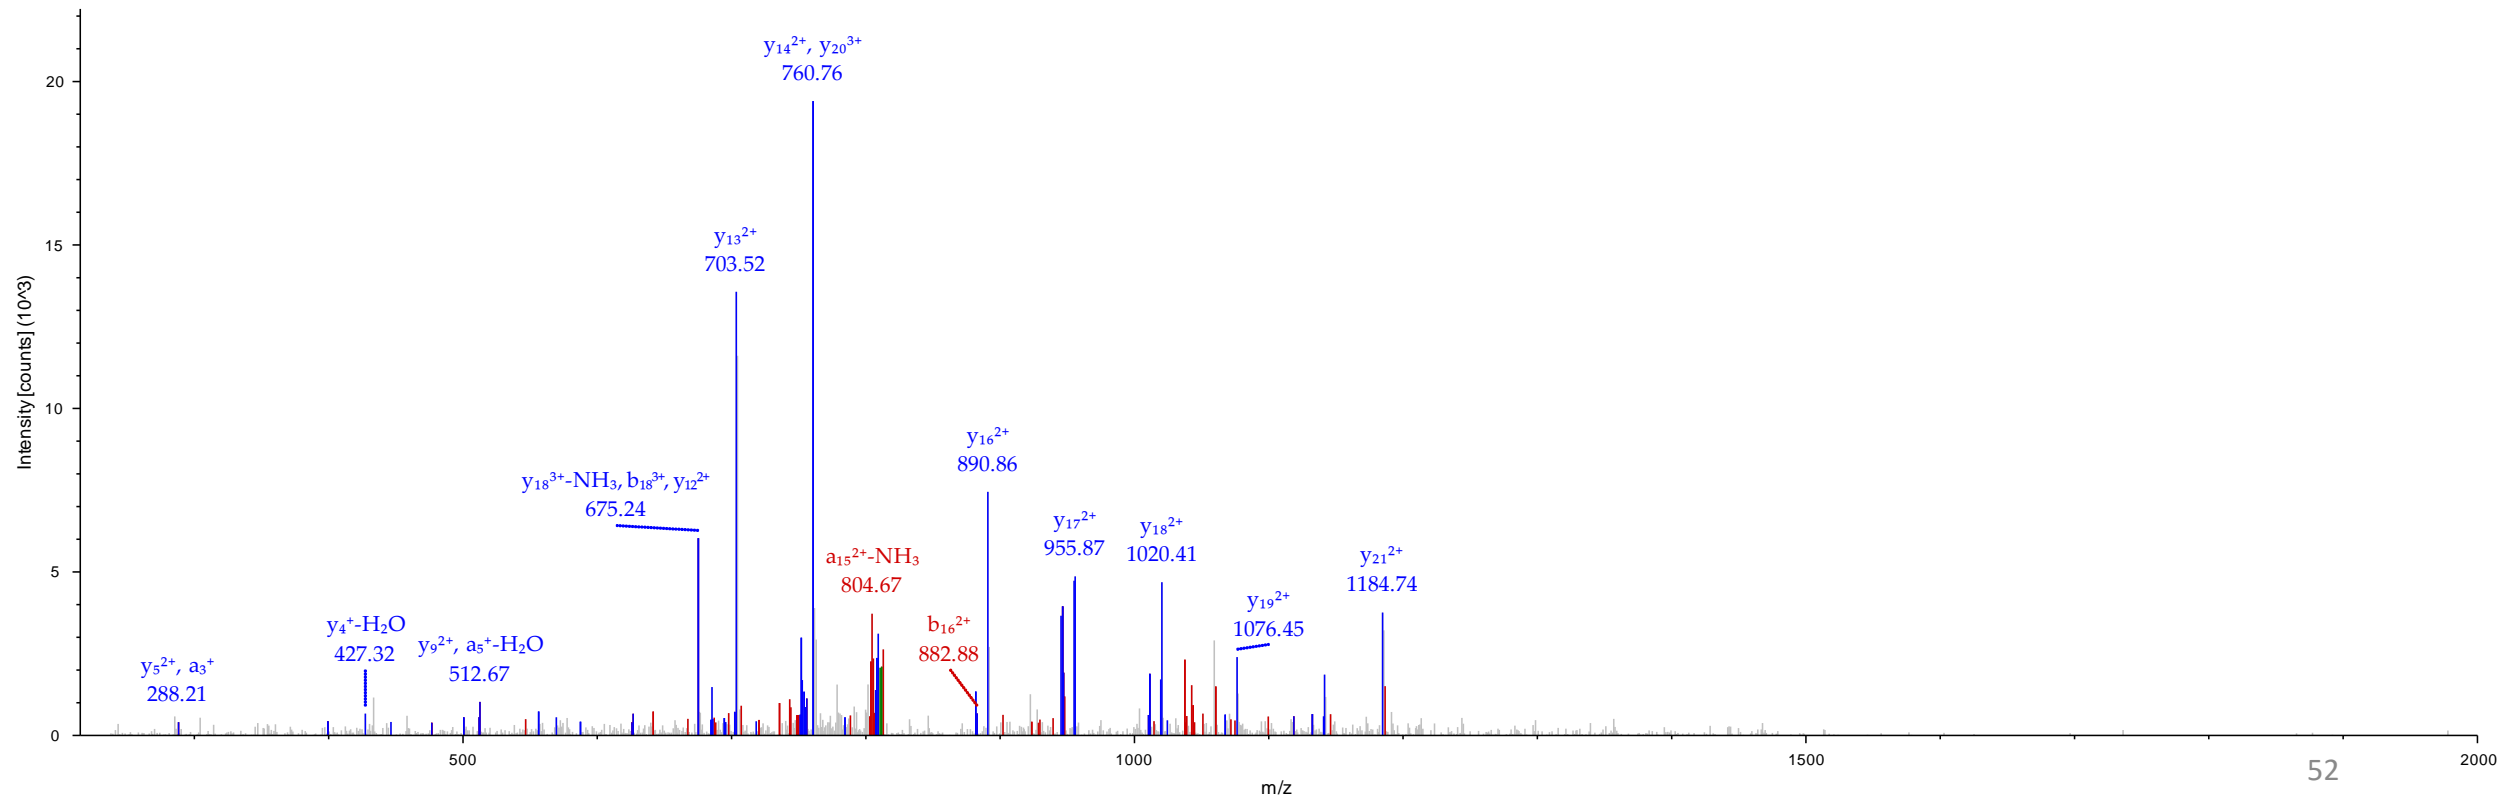

Sequence: VTNGAFTGEISLGMIK, Charge: +2, Monoisotopic m/z: 819.21472 Da (-217.46 mmu/-265.44 ppm), MH+: 1637.42217 Da, RT: 43.66 min

Identified with: Sequest HT (v1.3); XCorr:4.36

Fragment match tolerance used for search: 1 Da

Fragments used for search: a; a-H<sub>2</sub>O; a-NH<sub>3</sub>; b; b-H<sub>2</sub>O; b-NH<sub>3</sub>; y; y-H<sub>2</sub>O; y-NH<sub>3</sub>

**Protein references** (1): c.242C>T p.P81L|EISLGMI|Missense|COSMIC|Skin(1) CANCER\_sp\_P60174-1,TPIS\_HUMAN Isoform 2 of Triosephosphate isomerase

Extracted from: C:\Users\lazar\Desktop\MCF7\_raw\MCF7\_G1S\_2009\MCF7\_G1C1\_C18SCX\_120109\_3.RAW #4387 RT: 43.66  
ITMS, CID@35.00, z=+2, Mono m/z=819.21472 Da, MH+=1637.42217 Da, Match Tol.=1 Da

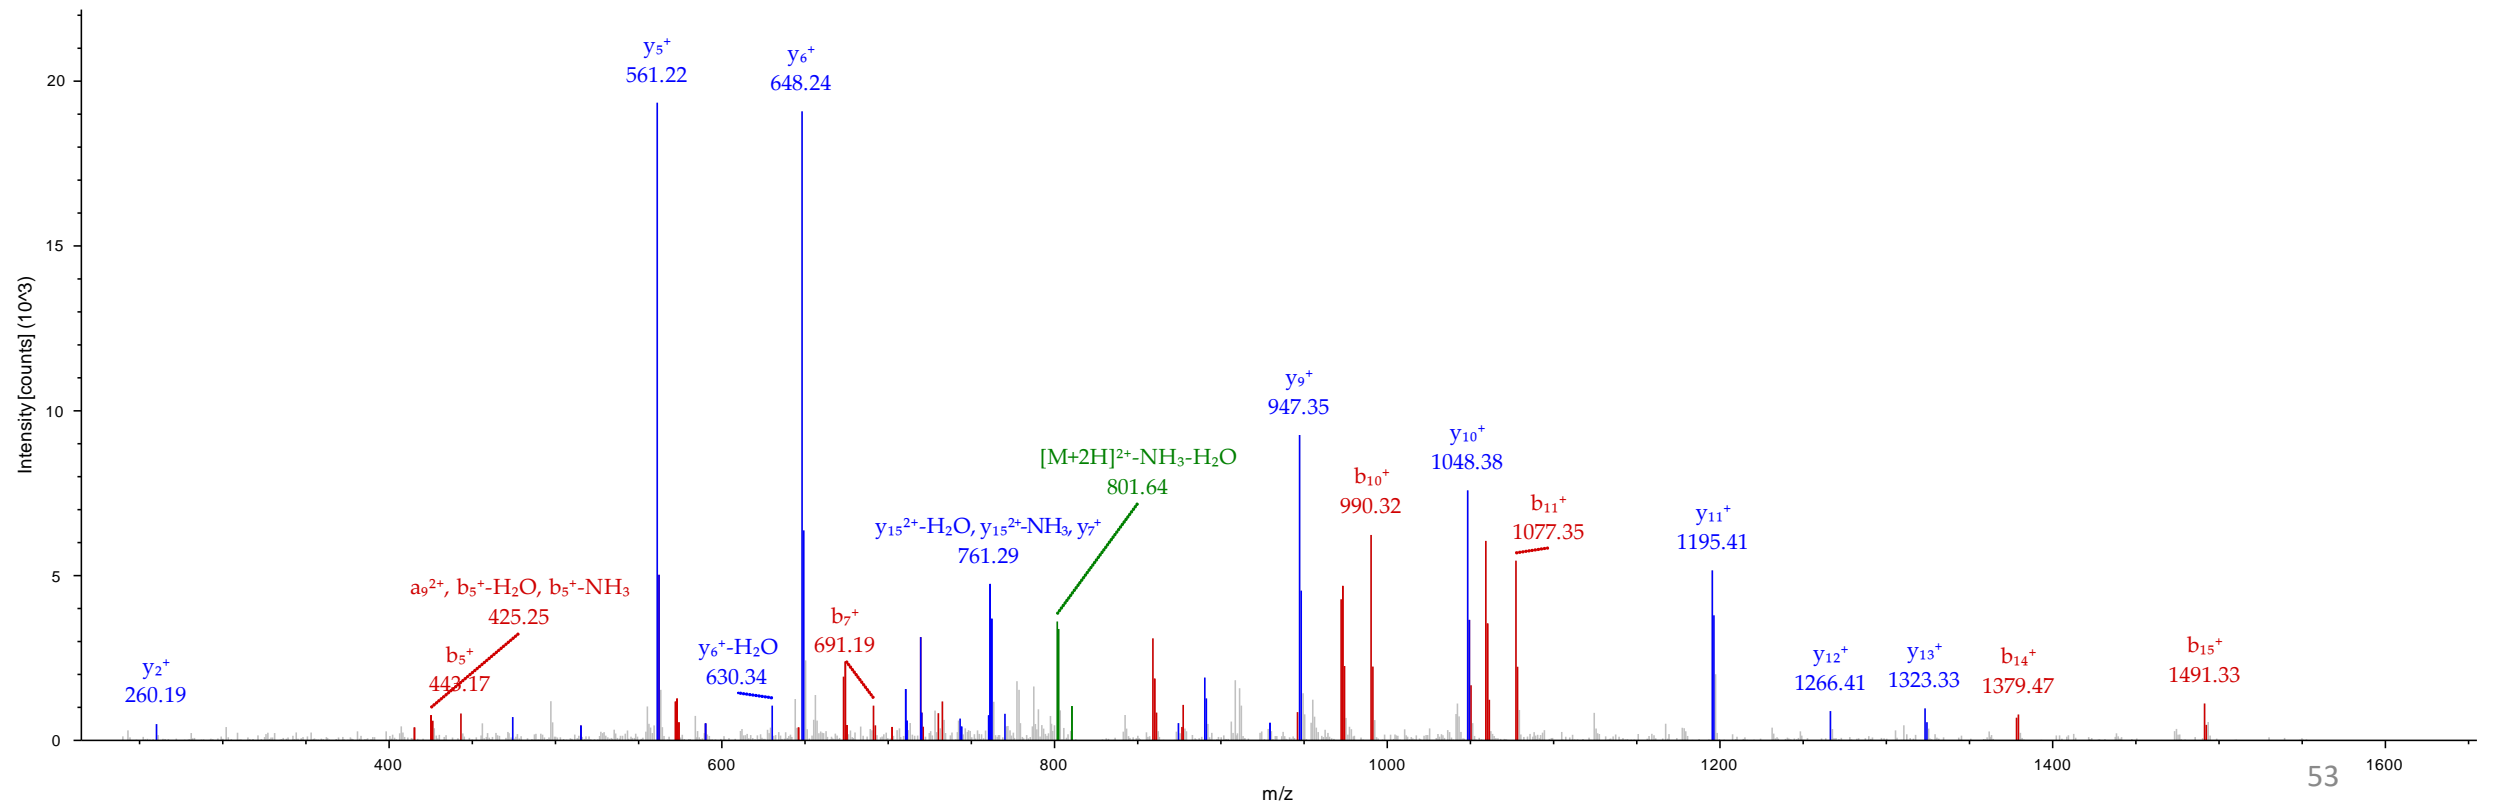

Supplement: 41598_2019_46897_MOESM2_ESM.pdf [file 41598_2019_46897_MOESM2_ESM.pdf]
