# Supplementary material for: Proteogenomic Analysis of Protein Sequence Alterations in Breast Cancer Cells
Source: PubMed Central journal article supplement (PMC6637242; doi:10.1038/s41598-019-46897-z), 2019-07-17

# **Proteogenomic Analysis of Protein Sequence Alterations in Breast Cancer Cells**

## **Supplemental Figure S1**

<sup>1,2</sup>Iulia M. Lazar,\* <sup>1</sup>Arba Karcini, <sup>1</sup>Shreya Ahuja, and <sup>3</sup>Carli Estrada-Palma

<sup>1</sup>Department of Biological Sciences, <sup>2</sup>Carilion School of Medicine, and <sup>3</sup>Department of Biochemistry, Virginia Tech  
1981 Kraft Drive, Blacksburg, VA 24061

\*Correspondence to: Iulia M. Lazar

E-mail: [malazar@vt.edu](mailto:malazar@vt.edu)

Phone: 540-231-5077

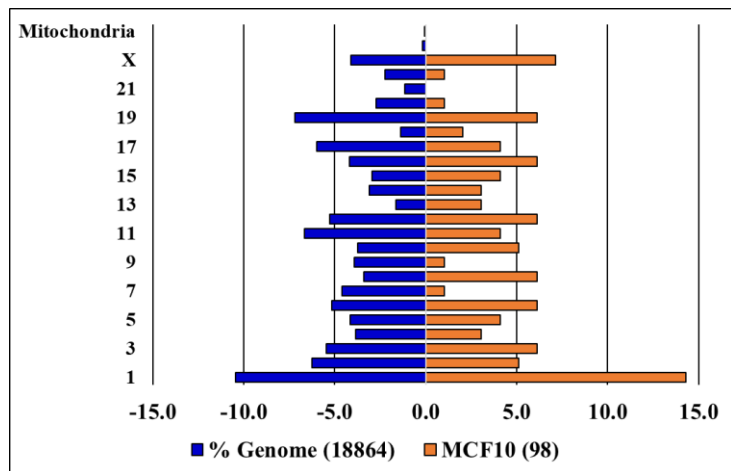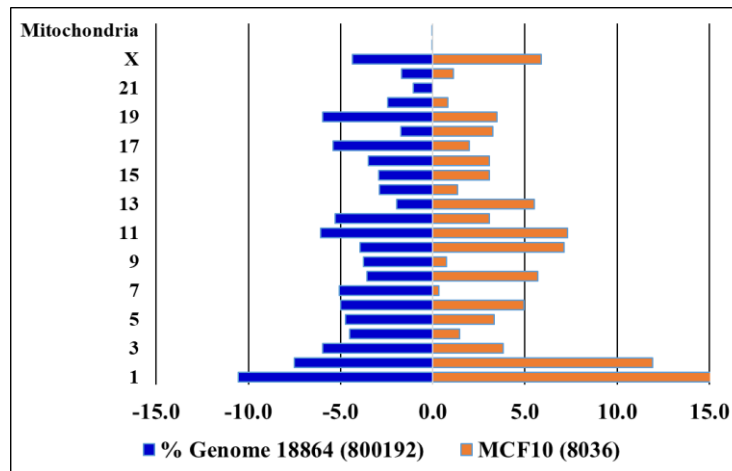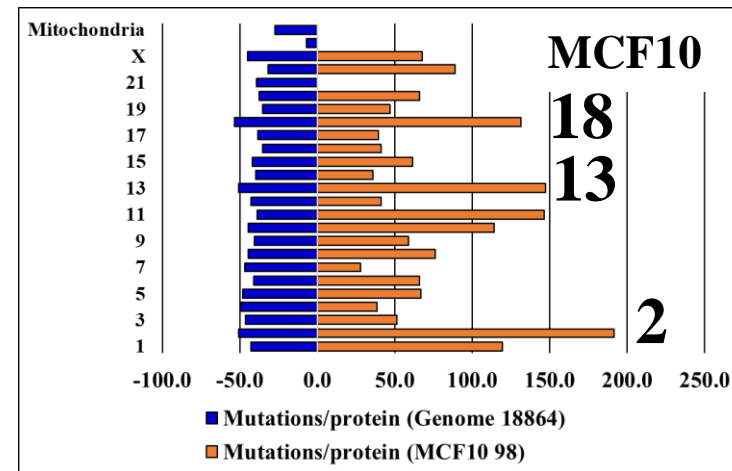

Supplement: 41598_2019_46897_MOESM1_ESM.pdf [file 41598_2019_46897_MOESM1_ESM.pdf]
